# Supplementary material for: Flow laws for ice constrained by seventy years of laboratory experiments
Source: Research Square preprint supplement (doi:10.21203/rs.3.rs-4809184/v1), 2025-02-26
Supplement: Supplementary file 1 [file e5e17c5df099ad7f9685a46a.xlsx]

## Sheet: Supplementary Table 1
Source	Sample No.	Sample type	Experiment type	Experiment kinematics	Confining pressure (MPa)	Comment on published mechanical data	Comment on extra unpublished data	Use strain-rate minimum or peak stress data?	Use tertiary creep or flow stress data?	Sample initial geometry	Sample initial diameter for compression (mm)	Sample initial length for compression (mm)	Sample length for shear (mm)	sample width for shear (mm)	sample height for shear (mm)	T	T upper bound	T lower bound	Comment on T error	Grain size unit: diameter (D) or area (A)	Initial median grain size D: (µm); A (µm^2)	Initial grain size lower bound D: (µm); A (µm^2)	Initial grain size upper bound D: (µm); A (µm^2)	Method for grain size measurement	Grain size error comment	Technique used to collect microstructural data	Resolution	Strain at minimum rate/ peak stress as published	Published strain type: Octahedral shear (O), Axial (A), Shear (S)?	True (T) or engineering (E) strain?	Stress (MPa) at minimum rate/ peak stress as published	Published stress type: Octahedral shear (O), Axial (A), Shear (S)?	Strain and stress Error Comments	Published strain rate type: Octahedral shear (O), Axial (A), Shear (S)?	If Axial, True (T) or engineering (E) strain rate?	Strain rate (/s) at minimum rate/ peak stress as published	Strain rate lower bound	Strain rate upper bound	Comment on rate error	Microstructural data at minimum rate/ peak stress	Grain size scale: diameter (D)? Area (A)	Mean grain size D: (µm); A (µm2) at minimum rate/ peak stress	Median grain size D: (µm); A (µm2) at minimum rate/ peak stress	Grain size lower bound D: (µm); A (µm2) at minimum rate/ peak stress	Grain size lower bound D: (µm); A (µm2) at minimum rate/ peak stress	Comment on measurement error of grain size	Bulk reduced Schmid factor at minimum rate/ peak stress	Comment on bulk reduced Schmid factor	Comment on sample geometry
Glen (1952)	N/A	H2O	Constant load	Uniaxial compression	0	Scattered plot (log-log) of strain rate at high strains (at teriery creep stage) as a function of stress (Fig. 4).	N/A	NO	YES	Cylindrical	25.4 or 50.8	50.8 or 101.6	N/A	N/A	N/A	-1.5	-0.8	-2.5	Temperature control: refrigerator.	D	1500	1000	2000	N/A	Mean grain diameter range provided in p113.	N/A	N/A	N/A	N/A	N/A	N/A	N/A	N/A	N/A	N/A	N/A	N/A	N/A	N/A	N/A	N/A	N/A	N/A	N/A	N/A	N/A	N/A	N/A	Sublimation discovered during some experiments. The other experiments prevented the sublimation via immersing samples in paraffin. Samples affected by sublimation are not specified. The paper suggests sublimation does not significantly affect mechanical behaviour (p113).
	N/A	H2O			0		N/A	NO	YES	Cylindrical	25.4 or 50.8	50.8 or 101.6	N/A	N/A	N/A	-1.5	-0.8	-2.5		D	1500	1000	2000	N/A		N/A	N/A	N/A	N/A	N/A	N/A	N/A	N/A	N/A	N/A	N/A	N/A	N/A	N/A	N/A	N/A	N/A	N/A	N/A	N/A	N/A	N/A	N/A
	N/A	H2O			0		N/A	NO	YES	Cylindrical	25.4 or 50.8	50.8 or 101.6	N/A	N/A	N/A	-1.5	-0.8	-2.5		D	1500	1000	2000	N/A		N/A	N/A	N/A	N/A	N/A	N/A	N/A	N/A	N/A	N/A	N/A	N/A	N/A	N/A	N/A	N/A	N/A	N/A	N/A	N/A	N/A	N/A	N/A
	N/A	H2O			0		N/A	NO	YES	Cylindrical	25.4 or 50.8	50.8 or 101.6	N/A	N/A	N/A	-1.5	-0.8	-2.5		D	1500	1000	2000	N/A		N/A	N/A	N/A	N/A	N/A	N/A	N/A	N/A	N/A	N/A	N/A	N/A	N/A	N/A	N/A	N/A	N/A	N/A	N/A	N/A	N/A	N/A	N/A
	N/A	H2O			0		N/A	NO	YES	Cylindrical	25.4 or 50.8	50.8 or 101.6	N/A	N/A	N/A	-1.5	-0.8	-2.5		D	1500	1000	2000	N/A		N/A	N/A	N/A	N/A	N/A	N/A	N/A	N/A	N/A	N/A	N/A	N/A	N/A	N/A	N/A	N/A	N/A	N/A	N/A	N/A	N/A	N/A	N/A
	N/A	H2O			0		N/A	NO	YES	Cylindrical	25.4 or 50.8	50.8 or 101.6	N/A	N/A	N/A	-1.5	-0.8	-2.5		D	1500	1000	2000	N/A		N/A	N/A	N/A	N/A	N/A	N/A	N/A	N/A	N/A	N/A	N/A	N/A	N/A	N/A	N/A	N/A	N/A	N/A	N/A	N/A	N/A	N/A	N/A
	N/A	H2O			0		N/A	NO	YES	Cylindrical	25.4 or 50.8	50.8 or 101.6	N/A	N/A	N/A	-1.5	-0.8	-2.5		D	1500	1000	2000	N/A		N/A	N/A	N/A	N/A	N/A	N/A	N/A	N/A	N/A	N/A	N/A	N/A	N/A	N/A	N/A	N/A	N/A	N/A	N/A	N/A	N/A	N/A	N/A
	N/A	H2O			0		N/A	NO	YES	Cylindrical	25.4 or 50.8	50.8 or 101.6	N/A	N/A	N/A	-1.5	-0.8	-2.5		D	1500	1000	2000	N/A		N/A	N/A	N/A	N/A	N/A	N/A	N/A	N/A	N/A	N/A	N/A	N/A	N/A	N/A	N/A	N/A	N/A	N/A	N/A	N/A	N/A	N/A	N/A
	N/A	H2O			0		N/A	NO	YES	Cylindrical	25.4 or 50.8	50.8 or 101.6	N/A	N/A	N/A	-1.5	-0.8	-2.5		D	1500	1000	2000	N/A		N/A	N/A	N/A	N/A	N/A	N/A	N/A	N/A	N/A	N/A	N/A	N/A	N/A	N/A	N/A	N/A	N/A	N/A	N/A	N/A	N/A	N/A	N/A
	N/A	H2O			0		N/A	NO	YES	Cylindrical	25.4 or 50.8	50.8 or 101.6	N/A	N/A	N/A	-1.5	-0.8	-2.5		D	1500	1000	2000	N/A		N/A	N/A	N/A	N/A	N/A	N/A	N/A	N/A	N/A	N/A	N/A	N/A	N/A	N/A	N/A	N/A	N/A	N/A	N/A	N/A	N/A	N/A	N/A
	N/A	H2O			0		N/A	NO	YES	Cylindrical	25.4 or 50.8	50.8 or 101.6	N/A	N/A	N/A	-1.5	-0.8	-2.5		D	1500	1000	2000	N/A		N/A	N/A	N/A	N/A	N/A	N/A	N/A	N/A	N/A	N/A	N/A	N/A	N/A	N/A	N/A	N/A	N/A	N/A	N/A	N/A	N/A	N/A	N/A
	N/A	H2O			0		N/A	NO	YES	Cylindrical	25.4 or 50.8	50.8 or 101.6	N/A	N/A	N/A	-1.5	-0.8	-2.5		D	1500	1000	2000	N/A		N/A	N/A	N/A	N/A	N/A	N/A	N/A	N/A	N/A	N/A	N/A	N/A	N/A	N/A	N/A	N/A	N/A	N/A	N/A	N/A	N/A	N/A	N/A
	N/A	H2O			0		N/A	NO	YES	Cylindrical	25.4 or 50.8	50.8 or 101.6	N/A	N/A	N/A	-1.5	-0.8	-2.5		D	1500	1000	2000	N/A		N/A	N/A	N/A	N/A	N/A	N/A	N/A	N/A	N/A	N/A	N/A	N/A	N/A	N/A	N/A	N/A	N/A	N/A	N/A	N/A	N/A	N/A	N/A
	N/A	H2O			0		N/A	NO	YES	Cylindrical	25.4 or 50.8	50.8 or 101.6	N/A	N/A	N/A	-1.5	-0.8	-2.5		D	1500	1000	2000	N/A		N/A	N/A	N/A	N/A	N/A	N/A	N/A	N/A	N/A	N/A	N/A	N/A	N/A	N/A	N/A	N/A	N/A	N/A	N/A	N/A	N/A	N/A	N/A
	N/A	H2O			0		N/A	NO	YES	Cylindrical	25.4 or 50.8	50.8 or 101.6	N/A	N/A	N/A	-1.5	-0.8	-2.5		D	1500	1000	2000	N/A		N/A	N/A	N/A	N/A	N/A	N/A	N/A	N/A	N/A	N/A	N/A	N/A	N/A	N/A	N/A	N/A	N/A	N/A	N/A	N/A	N/A	N/A	N/A
	N/A	H2O			0		N/A	NO	YES	Cylindrical	25.4 or 50.8	50.8 or 101.6	N/A	N/A	N/A	-1.5	-0.8	-2.5		D	1500	1000	2000	N/A		N/A	N/A	N/A	N/A	N/A	N/A	N/A	N/A	N/A	N/A	N/A	N/A	N/A	N/A	N/A	N/A	N/A	N/A	N/A	N/A	N/A	N/A	N/A
	N/A	H2O			0		N/A	NO	YES	Cylindrical	25.4 or 50.8	50.8 or 101.6	N/A	N/A	N/A	-1.5	-0.8	-2.5		D	1500	1000	2000	N/A		N/A	N/A	N/A	N/A	N/A	N/A	N/A	N/A	N/A	N/A	N/A	N/A	N/A	N/A	N/A	N/A	N/A	N/A	N/A	N/A	N/A	N/A	N/A
	N/A	H2O			0		N/A	NO	YES	Cylindrical	25.4 or 50.8	50.8 or 101.6	N/A	N/A	N/A	-1.5	-0.8	-2.5		D	1500	1000	2000	N/A		N/A	N/A	N/A	N/A	N/A	N/A	N/A	N/A	N/A	N/A	N/A	N/A	N/A	N/A	N/A	N/A	N/A	N/A	N/A	N/A	N/A	N/A	N/A
Glen (1955)	Beta	H2O	Constant load	Uniaxial compression	0	Creep curves of strain as a function of time (Figs. 3-6). Temperature, sampe name, secondary minimum strain rate, and remarks summarized in a table 2.	N/A	YES	NO	Cylindrical	25.4 or 50.8	50.8 or 101.6	N/A	N/A	N/A	0	0.03	-0.03	Samples immersed in a paraffin bath, which is immersed in a water-ice bath, the maximum variation of T in the paraffin bath is 0.03K (page 520).	D	1500	1000	2000	N/A	Estimation of initial grain size provided on page 113, Glen (1952).	N/A	N/A	N/A	A	E	0.16	A	No correction for surface area expansion. But its effect should be low at seconday minimum.	A	E	8.75E-08	N/A	N/A	N/A	N/A	N/A	N/A	N/A	N/A	N/A	N/A	N/A	N/A	N/A
	Gamma	H2O			0		N/A	YES	NO	Cylindrical	25.4 or 50.8	50.8 or 101.6	N/A	N/A	N/A	0	0.03	-0.03		D	1500	1000	2000	N/A		N/A	N/A	N/A	A	E	0.07	A		A	E	5.61E-08	N/A	N/A	N/A	N/A	N/A	N/A	N/A	N/A	N/A	N/A	N/A	N/A	N/A
	Gamma'	H2O			0		N/A	YES	NO	Cylindrical	25.4 or 50.8	50.8 or 101.6	N/A	N/A	N/A	0	0.03	-0.03		D	1500	1000	2000	N/A		N/A	N/A	N/A	A	E	0.16	A		A	E	5.90E-08	N/A	N/A	N/A	N/A	N/A	N/A	N/A	N/A	N/A	N/A	N/A	N/A	N/A
	Gamma''	H2O			0		N/A	YES	NO	Cylindrical	25.4 or 50.8	50.8 or 101.6	N/A	N/A	N/A	0	0.03	-0.03		D	1500	1000	2000	N/A		N/A	N/A	N/A	A	E	0.24	A		A	E	7.36E-08	N/A	N/A	N/A	N/A	N/A	N/A	N/A	N/A	N/A	N/A	N/A	N/A	N/A
	Delta	H2O			0		N/A	YES	NO	Cylindrical	25.4 or 50.8	50.8 or 101.6	N/A	N/A	N/A	0	0.03	-0.03		D	1500	1000	2000	N/A		N/A	N/A	N/A	A	E	0.07	A		A	E	2.06E-08	N/A	N/A	N/A	N/A	N/A	N/A	N/A	N/A	N/A	N/A	N/A	N/A	N/A
	Epsilon	H2O			0		N/A	NO	NO	Cylindrical	25.4 or 50.8	50.8 or 101.6	N/A	N/A	N/A	-0.02	-0.01	-0.03		D	1500	1000	2000	N/A		N/A	N/A	N/A	A	E	0.09	A		A	E	9.20E-09	N/A	N/A	Had not reached steady state. Data not used (Table 2).	N/A	N/A	N/A	N/A	N/A	N/A	N/A	N/A	N/A	N/A
	Theta	H2O			0		N/A	YES	NO	Cylindrical	25.4 or 50.8	50.8 or 101.6	N/A	N/A	N/A	-0.02	-0.01	-0.03		D	1500	1000	2000	N/A		N/A	N/A	N/A	A	E	0.15	A		A	E	2.16E-08	N/A	N/A	N/A	N/A	N/A	N/A	N/A	N/A	N/A	N/A	N/A	N/A	N/A
	Eta	H2O			0		N/A	YES	NO	Cylindrical	25.4 or 50.8	50.8 or 101.6	N/A	N/A	N/A	-0.02	-0.01	-0.03		D	1500	1000	2000	N/A		N/A	N/A	N/A	A	E	0.23	A		A	E	4.06E-08	N/A	N/A	N/A	N/A	N/A	N/A	N/A	N/A	N/A	N/A	N/A	N/A	N/A
	k	H2O			0		N/A	YES	NO	Cylindrical	25.4 or 50.8	50.8 or 101.6	N/A	N/A	N/A	-0.02	-0.01	-0.03		D	1500	1000	2000	N/A		N/A	N/A	N/A	A	E	0.33	A		A	E	1.33E-07	N/A	N/A	N/A	N/A	N/A	N/A	N/A	N/A	N/A	N/A	N/A	N/A	N/A
	j	H2O			0		N/A	YES	NO	Cylindrical	25.4 or 50.8	50.8 or 101.6	N/A	N/A	N/A	-0.02	-0.01	-0.03		D	1500	1000	2000	N/A		N/A	N/A	N/A	A	E	0.36	A		A	E	2.17E-07	N/A	N/A	N/A	N/A	N/A	N/A	N/A	N/A	N/A	N/A	N/A	N/A	N/A
	h	H2O			0		N/A	YES	NO	Cylindrical	25.4 or 50.8	50.8 or 101.6	N/A	N/A	N/A	-0.02	-0.01	-0.03		D	1500	1000	2000	N/A		N/A	N/A	N/A	A	E	0.61	A		A	E	1.55E-06	N/A	N/A	N/A	N/A	N/A	N/A	N/A	N/A	N/A	N/A	N/A	N/A	N/A
	i	H2O			0		N/A	YES	NO	Cylindrical	25.4 or 50.8	50.8 or 101.6	N/A	N/A	N/A	-0.02	-0.01	-0.03		D	1500	1000	2000	N/A		N/A	N/A	N/A	A	E	0.62	A		A	E	1.51E-06	N/A	N/A	N/A	N/A	N/A	N/A	N/A	N/A	N/A	N/A	N/A	N/A	N/A
	a	H2O			0		N/A	YES	NO	Cylindrical	25.4 or 50.8	50.8 or 101.6	N/A	N/A	N/A	-0.02	-0.01	-0.03		D	1500	1000	2000	N/A		N/A	N/A	N/A	A	E	0.85	A		A	E	3.87E-06	N/A	N/A	N/A	N/A	N/A	N/A	N/A	N/A	N/A	N/A	N/A	N/A	N/A
	b	H2O			0		N/A	YES	NO	Cylindrical	25.4 or 50.8	50.8 or 101.6	N/A	N/A	N/A	-0.02	-0.01	-0.03		D	1500	1000	2000	N/A		N/A	N/A	N/A	A	E	0.87	A		A	E	3.55E-06	N/A	N/A	N/A	N/A	N/A	N/A	N/A	N/A	N/A	N/A	N/A	N/A	N/A
	d	H2O			0		N/A	YES	NO	Cylindrical	25.4 or 50.8	50.8 or 101.6	N/A	N/A	N/A	-0.02	-0.01	-0.03		D	1500	1000	2000	N/A		N/A	N/A	N/A	A	E	0.87	A		A	E	9.32E-06	N/A	N/A	N/A	N/A	N/A	N/A	N/A	N/A	N/A	N/A	N/A	N/A	N/A
	f	H2O			0		N/A	YES	NO	Cylindrical	25.4 or 50.8	50.8 or 101.6	N/A	N/A	N/A	-0.02	-0.01	-0.03		D	1500	1000	2000	N/A		N/A	N/A	N/A	A	E	0.87	A		A	E	6.12E-06	N/A	N/A	N/A	N/A	N/A	N/A	N/A	N/A	N/A	N/A	N/A	N/A	N/A
	g	H2O			0		N/A	YES	NO	Cylindrical	25.4 or 50.8	50.8 or 101.6	N/A	N/A	N/A	-0.02	-0.01	-0.03		D	1500	1000	2000	N/A		N/A	N/A	N/A	A	E	0.9	A		A	E	8.31E-06	N/A	N/A	N/A	N/A	N/A	N/A	N/A	N/A	N/A	N/A	N/A	N/A	N/A
	c	H2O			0		N/A	YES	NO	Cylindrical	25.4 or 50.8	50.8 or 101.6	N/A	N/A	N/A	-0.02	-0.01	-0.03		D	1500	1000	2000	N/A		N/A	N/A	N/A	A	E	0.92	A		A	E	1.03E-05	N/A	N/A	N/A	N/A	N/A	N/A	N/A	N/A	N/A	N/A	N/A	N/A	N/A
	xii	H2O			0		N/A	YES	NO	Cylindrical	25.4 or 50.8	50.8 or 101.6	N/A	N/A	N/A	-1.5	-1	-2	Samples are immersed in a paraffin bath and placed in a cold chamber. The minimum variation of T is 0.5K (page 520).	D	1500	1000	2000	N/A		N/A	N/A	N/A	A	E	0.09	A		A	E	1.35E-09	N/A	N/A	N/A	N/A	N/A	N/A	N/A	N/A	N/A	N/A	N/A	N/A	N/A
	xi	H2O			0		N/A	YES	NO	Cylindrical	25.4 or 50.8	50.8 or 101.6	N/A	N/A	N/A	-1.7	-1.2	-2.2		D	1500	1000	2000	N/A		N/A	N/A	N/A	A	E	0.15	A		A	E	2.16E-09	N/A	N/A	N/A	N/A	N/A	N/A	N/A	N/A	N/A	N/A	N/A	N/A	N/A
	x	H2O			0		N/A	YES	NO	Cylindrical	25.4 or 50.8	50.8 or 101.6	N/A	N/A	N/A	-1.3	-0.8	-1.8		D	1500	1000	2000	N/A		N/A	N/A	N/A	A	E	0.15	A		A	E	4.63E-09	N/A	N/A	N/A	N/A	N/A	N/A	N/A	N/A	N/A	N/A	N/A	N/A	N/A
	iv	H2O			0		N/A	YES	NO	Cylindrical	25.4 or 50.8	50.8 or 101.6	N/A	N/A	N/A	-1.3	-0.8	-1.8		D	1500	1000	2000	N/A		N/A	N/A	N/A	A	E	0.17	A		A	E	2.73E-09	N/A	N/A	N/A	N/A	N/A	N/A	N/A	N/A	N/A	N/A	N/A	N/A	N/A
	vi	H2O			0		N/A	YES	NO	Cylindrical	25.4 or 50.8	50.8 or 101.6	N/A	N/A	N/A	-1.6	-1.1	-2.1		D	1500	1000	2000	N/A		N/A	N/A	N/A	A	E	0.18	A		A	E	7.01E-09	N/A	N/A	N/A	N/A	N/A	N/A	N/A	N/A	N/A	N/A	N/A	N/A	N/A
	v	H2O			0		N/A	NO	NO	Cylindrical	25.4 or 50.8	50.8 or 101.6	N/A	N/A	N/A	-1.5	-1	-2		D	1500	1000	2000	N/A		N/A	N/A	N/A	A	E	0.19	A		A	E	3.58E-09	N/A	N/A	No transient creep. Data not used.	N/A	N/A	N/A	N/A	N/A	N/A	N/A	N/A	N/A	N/A
	vii	H2O			0		N/A	YES	NO	Cylindrical	25.4 or 50.8	50.8 or 101.6	N/A	N/A	N/A	-1.1	-0.6	-1.6		D	1500	1000	2000	N/A		N/A	N/A	N/A	A	E	0.24	A		A	E	7.48E-09	N/A	N/A	N/A	N/A	N/A	N/A	N/A	N/A	N/A	N/A	N/A	N/A	N/A
	ix	H2O			0		N/A	YES	NO	Cylindrical	25.4 or 50.8	50.8 or 101.6	N/A	N/A	N/A	-1.5	-1	-2		D	1500	1000	2000	N/A		N/A	N/A	N/A	A	E	0.25	A		A	E	1.13E-08	N/A	N/A	N/A	N/A	N/A	N/A	N/A	N/A	N/A	N/A	N/A	N/A	N/A
	viii	H2O			0		N/A	YES	NO	Cylindrical	25.4 or 50.8	50.8 or 101.6	N/A	N/A	N/A	-2.1	-1.6	-2.6		D	1500	1000	2000	N/A		N/A	N/A	N/A	A	E	0.28	A		A	E	1.22E-08	N/A	N/A	N/A	N/A	N/A	N/A	N/A	N/A	N/A	N/A	N/A	N/A	N/A
	F	H2O			0		N/A	YES	NO	Cylindrical	25.4 or 50.8	50.8 or 101.6	N/A	N/A	N/A	-1.5	-1	-2		D	1500	1000	2000	N/A		N/A	N/A	N/A	A	E	0.37	A		A	E	2.47E-08	N/A	N/A	N/A	N/A	N/A	N/A	N/A	N/A	N/A	N/A	N/A	N/A	N/A
	C	H2O			0		N/A	YES	NO	Cylindrical	25.4 or 50.8	50.8 or 101.6	N/A	N/A	N/A	-1.3	-0.8	-1.8		D	1500	1000	2000	N/A		N/A	N/A	N/A	A	E	0.38	A		A	E	7.29E-08	N/A	N/A	N/A	N/A	N/A	N/A	N/A	N/A	N/A	N/A	N/A	N/A	N/A
	B	H2O			0		N/A	YES	NO	Cylindrical	25.4 or 50.8	50.8 or 101.6	N/A	N/A	N/A	-1.3	-0.8	-1.8		D	1500	1000	2000	N/A		N/A	N/A	N/A	A	E	0.41	A		A	E	7.23E-08	N/A	N/A	N/A	N/A	N/A	N/A	N/A	N/A	N/A	N/A	N/A	N/A	N/A
	A	H2O			0		N/A	YES	NO	Cylindrical	25.4 or 50.8	50.8 or 101.6	N/A	N/A	N/A	-2	-1.5	-2.5		D	1500	1000	2000	N/A		N/A	N/A	N/A	A	E	0.63	A		A	E	2.98E-07	N/A	N/A	N/A	N/A	N/A	N/A	N/A	N/A	N/A	N/A	N/A	N/A	N/A
	E	H2O			0		N/A	YES	NO	Cylindrical	25.4 or 50.8	50.8 or 101.6	N/A	N/A	N/A	-1.2	-0.7	-1.7		D	1500	1000	2000	N/A		N/A	N/A	N/A	A	E	0.64	A		A	E	2.27E-07	N/A	N/A	N/A	N/A	N/A	N/A	N/A	N/A	N/A	N/A	N/A	N/A	N/A
	D	H2O			0		N/A	YES	NO	Cylindrical	25.4 or 50.8	50.8 or 101.6	N/A	N/A	N/A	-1.4	-0.9	-1.9		D	1500	1000	2000	N/A		N/A	N/A	N/A	A	E	0.93	A		A	E	6.88E-07	N/A	N/A	N/A	N/A	N/A	N/A	N/A	N/A	N/A	N/A	N/A	N/A	N/A
	1	H2O			0		N/A	YES	NO	Cylindrical	25.4 or 50.8	50.8 or 101.6	N/A	N/A	N/A	-6.8	-6.3	-7.3		D	1500	1000	2000	N/A		N/A	N/A	N/A	A	E	0.22	A		A	E	3.27E-09	N/A	N/A	N/A	N/A	N/A	N/A	N/A	N/A	N/A	N/A	N/A	N/A	N/A
	2	H2O			0		N/A	YES	NO	Cylindrical	25.4 or 50.8	50.8 or 101.6	N/A	N/A	N/A	-6.7	-6.2	-7.2		D	1500	1000	2000	N/A		N/A	N/A	N/A	A	E	0.6	A		A	E	8.21E-08	N/A	N/A	N/A	N/A	N/A	N/A	N/A	N/A	N/A	N/A	N/A	N/A	N/A
	3	H2O			0		N/A	YES	NO	Cylindrical	25.4 or 50.8	50.8 or 101.6	N/A	N/A	N/A	-12.7	-12.2	-13.2		D	1500	1000	2000	N/A		N/A	N/A	N/A	A	E	0.59	A		A	E	1.55E-08	N/A	N/A	N/A	N/A	N/A	N/A	N/A	N/A	N/A	N/A	N/A	N/A	N/A
Duval & Gac (1980)	A1	H2O	Constant stress	Uniaxial compression	0	Minimum strain rate vs. grain size (Fig. 4). Summary data in table (Table 1).	N/A	MAYBE	NO	Cylindrical	80	119	N/A	N/A	N/A	-4.6	N/A	N/A	Temperature controlled by a cold room.	D	1800	1700	1900	N/A	page 153	Rigsby stage	N/A	N/A	A	E?	0.5	A	Secondary creep possibly not reached at the end of experiments (max strain 0.5-1%) (page 153).	A	E?	1.90E-08	N/A	N/A	Secondary creep possibly not reached (page 153).	N/A	N/A	N/A	N/A	N/A	N/A	N/A	N/A	N/A	N/A
	A2	H2O			0		N/A	MAYBE	NO	Cylindrical	80	120	N/A	N/A	N/A	-7	N/A	N/A		D	5060	4060	6060	N/A			N/A	N/A	A	E?	0.5	A		A	E?	9.00E-09	N/A	N/A		N/A	N/A	N/A	N/A	N/A	N/A	N/A	N/A	N/A	N/A
	A3	H2O			0		N/A	MAYBE	NO	Cylindrical	80	120	N/A	N/A	N/A	-7.2	N/A	N/A		D	1070	970	1170	N/A			N/A	N/A	A	E?	0.48	A		A	E?	1.00E-08	N/A	N/A		N/A	N/A	N/A	N/A	N/A	N/A	N/A	N/A	N/A	N/A
	A4	H2O			0		N/A	MAYBE	NO	Cylindrical	80	117	N/A	N/A	N/A	-7.2	N/A	N/A		D	1100	1000	1200	N/A			N/A	N/A	A	E?	0.5	A		A	E?	1.20E-08	N/A	N/A		N/A	N/A	N/A	N/A	N/A	N/A	N/A	N/A	N/A	N/A
	A5	H2O			0		N/A	MAYBE	NO	Cylindrical	80	120	N/A	N/A	N/A	-7.2	N/A	N/A		D	1400	1300	1500	N/A			N/A	N/A	A	E?	0.48	A		A	E?	8.00E-09	N/A	N/A		N/A	N/A	N/A	N/A	N/A	N/A	N/A	N/A	N/A	N/A
	A6	H2O			0		N/A	MAYBE	NO	Cylindrical	80	119	N/A	N/A	N/A	-7.2	N/A	N/A		D	7000	6000	8000	N/A			N/A	N/A	A	E?	0.49	A		A	E?	4.00E-09	N/A	N/A		N/A	N/A	N/A	N/A	N/A	N/A	N/A	N/A	N/A	N/A
	A7	H2O			0		N/A	MAYBE	NO	Cylindrical	80	118	N/A	N/A	N/A	-7.2	N/A	N/A		D	1880	1780	1980	N/A			N/A	N/A	A	E?	0.49	A		A	E?	7.00E-09	N/A	N/A		N/A	N/A	N/A	N/A	N/A	N/A	N/A	N/A	N/A	N/A
Jones & Chew (1981)	N/A	H2O	Constant stress	Uniaxial compression	0	High strain rate (5E-4/s) but without confining pressure. Sample cracking is very possible during deformation. These data are in duplicate with Jones & Chew (1983). We use the latter one for modelling as it includes more data points.	N/A	NO	NO	Cylindrical	20	60	N/A	N/A	N/A	-10.5	N/A	N/A	N/A	D	900.41	N/A	N/A	N/A	Grain size digitised from Fig. 1.	N/A	N/A	N/A	A	E?	7.8	A	Stress digitised from Fig. 1.	A	E?	5.50E-04	N/A	N/A	N/A	N/A	N/A	N/A	N/A	N/A	N/A	N/A	N/A	N/A	N/A
	N/A	H2O			0		N/A	NO	NO	Cylindrical	20	60	N/A	N/A	N/A	-10.5	N/A	N/A	N/A	D	900.63	N/A	N/A	N/A		N/A	N/A	N/A	A	E?	7.09	A		A	E?	5.50E-04	N/A	N/A	N/A	N/A	N/A	N/A	N/A	N/A	N/A	N/A	N/A	N/A	N/A
	N/A	H2O			0		N/A	NO	NO	Cylindrical	20	60	N/A	N/A	N/A	-10.5	N/A	N/A	N/A	D	999.14	N/A	N/A	N/A		N/A	N/A	N/A	A	E?	7.48	A		A	E?	5.50E-04	N/A	N/A	N/A	N/A	N/A	N/A	N/A	N/A	N/A	N/A	N/A	N/A	N/A
	N/A	H2O			0		N/A	NO	NO	Cylindrical	20	60	N/A	N/A	N/A	-10.5	N/A	N/A	N/A	D	999.17	N/A	N/A	N/A		N/A	N/A	N/A	A	E?	7.39	A		A	E?	5.50E-04	N/A	N/A	N/A	N/A	N/A	N/A	N/A	N/A	N/A	N/A	N/A	N/A	N/A
	N/A	H2O			0		N/A	NO	NO	Cylindrical	20	60	N/A	N/A	N/A	-10.5	N/A	N/A	N/A	D	1102.85	N/A	N/A	N/A		N/A	N/A	N/A	A	E?	8.76	A		A	E?	5.50E-04	N/A	N/A	N/A	N/A	N/A	N/A	N/A	N/A	N/A	N/A	N/A	N/A	N/A
	N/A	H2O			0		N/A	NO	NO	Cylindrical	20	60	N/A	N/A	N/A	-10.5	N/A	N/A	N/A	D	1103.19	N/A	N/A	N/A		N/A	N/A	N/A	A	E?	7.66	A		A	E?	5.50E-04	N/A	N/A	N/A	N/A	N/A	N/A	N/A	N/A	N/A	N/A	N/A	N/A	N/A
	N/A	H2O			0		N/A	NO	NO	Cylindrical	20	60	N/A	N/A	N/A	-10.5	N/A	N/A	N/A	D	1103.23	N/A	N/A	N/A		N/A	N/A	N/A	A	E?	7.56	A		A	E?	5.50E-04	N/A	N/A	N/A	N/A	N/A	N/A	N/A	N/A	N/A	N/A	N/A	N/A	N/A
	N/A	H2O			0		N/A	NO	NO	Cylindrical	20	60	N/A	N/A	N/A	-10.5	N/A	N/A	N/A	D	1103.27	N/A	N/A	N/A		N/A	N/A	N/A	A	E?	7.42	A		A	E?	5.50E-04	N/A	N/A	N/A	N/A	N/A	N/A	N/A	N/A	N/A	N/A	N/A	N/A	N/A
	N/A	H2O			0		N/A	NO	NO	Cylindrical	20	60	N/A	N/A	N/A	-10.5	N/A	N/A	N/A	D	1198.47	N/A	N/A	N/A		N/A	N/A	N/A	A	E?	7.88	A		A	E?	5.50E-04	N/A	N/A	N/A	N/A	N/A	N/A	N/A	N/A	N/A	N/A	N/A	N/A	N/A
	N/A	H2O			0		N/A	NO	NO	Cylindrical	20	60	N/A	N/A	N/A	-10.5	N/A	N/A	N/A	D	1197.42	N/A	N/A	N/A		N/A	N/A	N/A	A	E?	7.74	A		A	E?	5.50E-04	N/A	N/A	N/A	N/A	N/A	N/A	N/A	N/A	N/A	N/A	N/A	N/A	N/A
	N/A	H2O			0		N/A	NO	NO	Cylindrical	20	60	N/A	N/A	N/A	-10.5	N/A	N/A	N/A	D	1197.5	N/A	N/A	N/A		N/A	N/A	N/A	A	E?	7.48	A		A	E?	5.50E-04	N/A	N/A	N/A	N/A	N/A	N/A	N/A	N/A	N/A	N/A	N/A	N/A	N/A
	N/A	H2O			0		N/A	NO	NO	Cylindrical	20	60	N/A	N/A	N/A	-10.5	N/A	N/A	N/A	D	1197.62	N/A	N/A	N/A		N/A	N/A	N/A	A	E?	7.1	A		A	E?	5.50E-04	N/A	N/A	N/A	N/A	N/A	N/A	N/A	N/A	N/A	N/A	N/A	N/A	N/A
	N/A	H2O			0		N/A	NO	NO	Cylindrical	20	60	N/A	N/A	N/A	-10.5	N/A	N/A	N/A	D	1300.34	N/A	N/A	N/A		N/A	N/A	N/A	A	E?	8.02	A		A	E?	5.50E-04	N/A	N/A	N/A	N/A	N/A	N/A	N/A	N/A	N/A	N/A	N/A	N/A	N/A
	N/A	H2O			0		N/A	NO	NO	Cylindrical	20	60	N/A	N/A	N/A	-10.5	N/A	N/A	N/A	D	1300.42	N/A	N/A	N/A		N/A	N/A	N/A	A	E?	7.76	A		A	E?	5.50E-04	N/A	N/A	N/A	N/A	N/A	N/A	N/A	N/A	N/A	N/A	N/A	N/A	N/A
	N/A	H2O			0		N/A	NO	NO	Cylindrical	20	60	N/A	N/A	N/A	-10.5	N/A	N/A	N/A	D	1300.54	N/A	N/A	N/A		N/A	N/A	N/A	A	E?	7.4	A		A	E?	5.50E-04	N/A	N/A	N/A	N/A	N/A	N/A	N/A	N/A	N/A	N/A	N/A	N/A	N/A
	N/A	H2O			0		N/A	NO	NO	Cylindrical	20	60	N/A	N/A	N/A	-10.5	N/A	N/A	N/A	D	1300.65	N/A	N/A	N/A		N/A	N/A	N/A	A	E?	7.05	A		A	E?	5.50E-04	N/A	N/A	N/A	N/A	N/A	N/A	N/A	N/A	N/A	N/A	N/A	N/A	N/A
	N/A	H2O			0		N/A	NO	NO	Cylindrical	20	60	N/A	N/A	N/A	-10.5	N/A	N/A	N/A	D	1300.67	N/A	N/A	N/A		N/A	N/A	N/A	A	E?	6.97	A		A	E?	5.50E-04	N/A	N/A	N/A	N/A	N/A	N/A	N/A	N/A	N/A	N/A	N/A	N/A	N/A
	N/A	H2O			0		N/A	NO	NO	Cylindrical	20	60	N/A	N/A	N/A	-10.5	N/A	N/A	N/A	D	1300.7	N/A	N/A	N/A		N/A	N/A	N/A	A	E?	6.88	A		A	E?	5.50E-04	N/A	N/A	N/A	N/A	N/A	N/A	N/A	N/A	N/A	N/A	N/A	N/A	N/A
	N/A	H2O			0		N/A	NO	NO	Cylindrical	20	60	N/A	N/A	N/A	-10.5	N/A	N/A	N/A	D	1300.81	N/A	N/A	N/A		N/A	N/A	N/A	A	E?	6.54	A		A	E?	5.50E-04	N/A	N/A	N/A	N/A	N/A	N/A	N/A	N/A	N/A	N/A	N/A	N/A	N/A
	N/A	H2O			0		N/A	NO	NO	Cylindrical	20	60	N/A	N/A	N/A	-10.5	N/A	N/A	N/A	D	1402.1	N/A	N/A	N/A		N/A	N/A	N/A	A	E?	8.53	A		A	E?	5.50E-04	N/A	N/A	N/A	N/A	N/A	N/A	N/A	N/A	N/A	N/A	N/A	N/A	N/A
	N/A	H2O			0		N/A	NO	NO	Cylindrical	20	60	N/A	N/A	N/A	-10.5	N/A	N/A	N/A	D	1403.27	N/A	N/A	N/A		N/A	N/A	N/A	A	E?	8.3	A		A	E?	5.50E-04	N/A	N/A	N/A	N/A	N/A	N/A	N/A	N/A	N/A	N/A	N/A	N/A	N/A
	N/A	H2O			0		N/A	NO	NO	Cylindrical	20	60	N/A	N/A	N/A	-10.5	N/A	N/A	N/A	D	1500.98	N/A	N/A	N/A		N/A	N/A	N/A	A	E?	7.74	A		A	E?	5.50E-04	N/A	N/A	N/A	N/A	N/A	N/A	N/A	N/A	N/A	N/A	N/A	N/A	N/A
	N/A	H2O			0		N/A	NO	NO	Cylindrical	20	60	N/A	N/A	N/A	-10.5	N/A	N/A	N/A	D	1699.6	N/A	N/A	N/A		N/A	N/A	N/A	A	E?	6.9	A		A	E?	5.50E-04	N/A	N/A	N/A	N/A	N/A	N/A	N/A	N/A	N/A	N/A	N/A	N/A	N/A
	N/A	H2O			0		N/A	NO	NO	Cylindrical	20	60	N/A	N/A	N/A	-10.5	N/A	N/A	N/A	D	1802.35	N/A	N/A	N/A		N/A	N/A	N/A	A	E?	7.74	A		A	E?	5.50E-04	N/A	N/A	N/A	N/A	N/A	N/A	N/A	N/A	N/A	N/A	N/A	N/A	N/A
Mellor and Cole (1982)	06CL	H2O	Constant stress	Uniaxial compression	0	Full creep curves (Figs. 4-6). Summary data in a table (Table 2).	N/A	NO	NO	Cylindrical	50.8	127	N/A	N/A	N/A	-5	-4.9	-5.1	Page 205	D	1200	N/A	N/A	N/A	N/A	N/A	N/A	0.0085	A	E?	3.11	A	N/A	A	E?	6.33E-06	N/A	N/A	N/A	N/A	N/A	N/A	N/A	N/A	N/A	N/A	N/A	N/A	N/A
	08CL	H2O			0		N/A	NO	NO	Cylindrical	50.8	127	N/A	N/A	N/A	-5	-4.9	-5.1		D	1200	N/A	N/A	N/A	N/A	N/A	N/A	0.0069	A	E?	3.06	A	N/A	A	E?	6.02E-06	N/A	N/A	N/A	N/A	N/A	N/A	N/A	N/A	N/A	N/A	N/A	N/A	N/A
	09CL	H2O			0		N/A	NO	NO	Cylindrical	50.8	127	N/A	N/A	N/A	-5	-4.9	-5.1		D	1200	N/A	N/A	N/A	N/A	N/A	N/A	0.0095	A	E?	3.07	A	N/A	A	E?	6.57E-06	N/A	N/A	N/A	N/A	N/A	N/A	N/A	N/A	N/A	N/A	N/A	N/A	N/A
	11CL	H2O			0		N/A	NO	NO	Cylindrical	50.8	127	N/A	N/A	N/A	-5	-4.9	-5.1		D	1200	N/A	N/A	N/A	N/A	N/A	N/A	0.0096	A	E?	2.34	A	N/A	A	E?	2.60E-06	N/A	N/A	N/A	N/A	N/A	N/A	N/A	N/A	N/A	N/A	N/A	N/A	N/A
	17CL	H2O			0		N/A	NO	NO	Cylindrical	50.8	127	N/A	N/A	N/A	-5	-4.9	-5.1		D	1200	N/A	N/A	N/A	N/A	N/A	N/A	0.0083	A	E?	3.65	A	N/A	A	E?	1.27E-05	N/A	N/A	N/A	N/A	N/A	N/A	N/A	N/A	N/A	N/A	N/A	N/A	N/A
	28CL	H2O			0		N/A	NO	NO	Cylindrical	50.8	127	N/A	N/A	N/A	-5	-4.9	-5.1		D	1200	N/A	N/A	N/A	N/A	N/A	N/A	0.011	A	E?	1.86	A	N/A	A	E?	1.63E-06	N/A	N/A	N/A	N/A	N/A	N/A	N/A	N/A	N/A	N/A	N/A	N/A	N/A
	32CL	H2O			0		N/A	NO	NO	Cylindrical	50.8	127	N/A	N/A	N/A	-5	-4.9	-5.1		D	1200	N/A	N/A	N/A	N/A	N/A	N/A	0.0101	A	E?	3.76	A	N/A	A	E?	2.17E-05	N/A	N/A	N/A	N/A	N/A	N/A	N/A	N/A	N/A	N/A	N/A	N/A	N/A
	36CL	H2O			0		N/A	NO	NO	Cylindrical	50.8	127	N/A	N/A	N/A	-5	-4.9	-5.1		D	1200	N/A	N/A	N/A	N/A	N/A	N/A	0.0094	A	E?	2.11	A	N/A	A	E?	3.45E-06	N/A	N/A	N/A	N/A	N/A	N/A	N/A	N/A	N/A	N/A	N/A	N/A	N/A
	38CL	H2O			0		N/A	NO	NO	Cylindrical	50.8	127	N/A	N/A	N/A	-5	-4.9	-5.1		D	1200	N/A	N/A	N/A	N/A	N/A	N/A	0.0083	A	E?	3.26	A	N/A	A	E?	1.65E-05	N/A	N/A	N/A	N/A	N/A	N/A	N/A	N/A	N/A	N/A	N/A	N/A	N/A
	42CL	H2O			0		N/A	NO	NO	Cylindrical	50.8	127	N/A	N/A	N/A	-5	-4.9	-5.1		D	1200	N/A	N/A	N/A	N/A	N/A	N/A	0.0095	A	E?	2.63	A	N/A	A	E?	8.34E-06	N/A	N/A	N/A	N/A	N/A	N/A	N/A	N/A	N/A	N/A	N/A	N/A	N/A
	45CL	H2O			0		N/A	NO	NO	Cylindrical	50.8	127	N/A	N/A	N/A	-5	-4.9	-5.1		D	1200	N/A	N/A	N/A	N/A	N/A	N/A	0.0084	A	E?	3.67	A	N/A	A	E?	2.64E-05	N/A	N/A	N/A	N/A	N/A	N/A	N/A	N/A	N/A	N/A	N/A	N/A	N/A
	70CL	H2O			0		N/A	NO	NO	Cylindrical	50.8	127	N/A	N/A	N/A	-5	-4.9	-5.1		D	1200	N/A	N/A	N/A	N/A	N/A	N/A	0.0098	A	E?	3.67	A	N/A	A	E?	2.47E-05	N/A	N/A	N/A	N/A	N/A	N/A	N/A	N/A	N/A	N/A	N/A	N/A	N/A
	71CL	H2O			0		N/A	NO	NO	Cylindrical	50.8	127	N/A	N/A	N/A	-5	-4.9	-5.1		D	1200	N/A	N/A	N/A	N/A	N/A	N/A	0.008	A	E?	3.68	A	N/A	A	E?	2.44E-05	N/A	N/A	N/A	N/A	N/A	N/A	N/A	N/A	N/A	N/A	N/A	N/A	N/A
	95CL	H2O			0		N/A	NO	NO	Cylindrical	50.8	127	N/A	N/A	N/A	-5	-4.9	-5.1		D	1200	N/A	N/A	N/A	N/A	N/A	N/A	0.0108	A	E?	1.25	A	N/A	A	E?	5.83E-07	N/A	N/A	N/A	N/A	N/A	N/A	N/A	N/A	N/A	N/A	N/A	N/A	N/A
	96CL	H2O			0		N/A	YES	NO	Cylindrical	50.8	127	N/A	N/A	N/A	-5	-4.9	-5.1		D	1200	N/A	N/A	N/A	N/A	N/A	N/A	0.0101	A	E?	0.8	A	N/A	A	E?	1.02E-07	N/A	N/A	N/A	N/A	N/A	N/A	N/A	N/A	N/A	N/A	N/A	N/A	N/A
	97CL	H2O			0		N/A	NO	NO	Cylindrical	50.8	127	N/A	N/A	N/A	-5	-4.9	-5.1		D	1200	N/A	N/A	N/A	N/A	N/A	N/A	0.0064	A	E?	2.35	A	N/A	A	E?	2.51E-06	N/A	N/A	N/A	N/A	N/A	N/A	N/A	N/A	N/A	N/A	N/A	N/A	N/A
	98CL	H2O			0		N/A	NO	NO	Cylindrical	50.8	127	N/A	N/A	N/A	-5	-4.9	-5.1		D	1200	N/A	N/A	N/A	N/A	N/A	N/A	0.0072	A	E?	1.54	A	N/A	A	E?	5.29E-07	N/A	N/A	N/A	N/A	N/A	N/A	N/A	N/A	N/A	N/A	N/A	N/A	N/A
	99CL	H2O			0		N/A	NO	NO	Cylindrical	50.8	127	N/A	N/A	N/A	-5	-4.9	-5.1		D	1200	N/A	N/A	N/A	N/A	N/A	N/A	0.0094	A	E?	1.54	A	N/A	A	E?	7.80E-07	N/A	N/A	N/A	N/A	N/A	N/A	N/A	N/A	N/A	N/A	N/A	N/A	N/A
	100CL	H2O			0		N/A	NO	NO	Cylindrical	50.8	127	N/A	N/A	N/A	-5	-4.9	-5.1		D	1200	N/A	N/A	N/A	N/A	N/A	N/A	0.0066	A	E?	1.84	A	N/A	A	E?	1.16E-06	N/A	N/A	N/A	N/A	N/A	N/A	N/A	N/A	N/A	N/A	N/A	N/A	N/A
	101CL	H2O			0		N/A	NO	NO	Cylindrical	50.8	127	N/A	N/A	N/A	-5	-4.9	-5.1		D	1200	N/A	N/A	N/A	N/A	N/A	N/A	0.0071	A	E?	2	A	N/A	A	E?	1.67E-06	N/A	N/A	N/A	N/A	N/A	N/A	N/A	N/A	N/A	N/A	N/A	N/A	N/A
	115CL	H2O			0		N/A	NO	NO	Cylindrical	50.8	127	N/A	N/A	N/A	-5	-4.9	-5.1		D	1200	N/A	N/A	N/A	N/A	N/A	N/A	0.0084	A	E?	2	A	N/A	A	E?	1.80E-06	N/A	N/A	N/A	N/A	N/A	N/A	N/A	N/A	N/A	N/A	N/A	N/A	N/A
	116CL	H2O			0		N/A	YES	NO	Cylindrical	50.8	127	N/A	N/A	N/A	-5	-4.9	-5.1		D	1200	N/A	N/A	N/A	N/A	N/A	N/A	0.0095	A	E?	1	A	N/A	A	E?	2.27E-07	N/A	N/A	N/A	N/A	N/A	N/A	N/A	N/A	N/A	N/A	N/A	N/A	N/A
	117CL	H2O			0		N/A	YES	NO	Cylindrical	50.8	127	N/A	N/A	N/A	-5	-4.9	-5.1		D	1200	N/A	N/A	N/A	N/A	N/A	N/A	0.0102	A	E?	0.8	A	N/A	A	E?	1.03E-07	N/A	N/A	N/A	N/A	N/A	N/A	N/A	N/A	N/A	N/A	N/A	N/A	N/A
	94CL	H2O			0		N/A	YES	NO	Cylindrical	50.8	127	N/A	N/A	N/A	-5	-4.9	-5.1		D	1200	N/A	N/A	N/A	N/A	N/A	N/A	0.0084	A	E?	1	A	N/A	A	E?	2.25E-07	N/A	N/A	N/A	N/A	N/A	N/A	N/A	N/A	N/A	N/A	N/A	N/A	N/A
	01CD	H2O	Constant displacement rate		0	Full creep curves (Figs. 7, 8). Summary data in a table (Table 3).	N/A	NO	NO	Cylindrical	50.8	127	N/A	N/A	N/A	-5	-4.9	-5.1		D	1200	N/A	N/A	N/A	N/A	N/A	N/A	0.0141	A	E?	2.74	A	N/A	A	E?	6.90E-06	N/A	N/A	N/A	N/A	N/A	N/A	N/A	N/A	N/A	N/A	N/A	N/A	N/A
	02CD	H2O			0		N/A	NO	NO	Cylindrical	50.8	127	N/A	N/A	N/A	-5	-4.9	-5.1		D	1200	N/A	N/A	N/A	N/A	N/A	N/A	0.0156	A	E?	2.59	A	N/A	A	E?	6.11E-06	N/A	N/A	N/A	N/A	N/A	N/A	N/A	N/A	N/A	N/A	N/A	N/A	N/A
	04CD	H2O			0		N/A	NO	NO	Cylindrical	50.8	127	N/A	N/A	N/A	-5	-4.9	-5.1		D	1200	N/A	N/A	N/A	N/A	N/A	N/A	0.0124	A	E?	3.03	A	N/A	A	E?	6.20E-06	N/A	N/A	N/A	N/A	N/A	N/A	N/A	N/A	N/A	N/A	N/A	N/A	N/A
	05CD	H2O			0		N/A	NO	NO	Cylindrical	50.8	127	N/A	N/A	N/A	-5	-4.9	-5.1		D	1200	N/A	N/A	N/A	N/A	N/A	N/A	0.0115	A	E?	3.04	A	N/A	A	E?	5.91E-06	N/A	N/A	N/A	N/A	N/A	N/A	N/A	N/A	N/A	N/A	N/A	N/A	N/A
	10CD	H2O			0		N/A	NO	NO	Cylindrical	50.8	127	N/A	N/A	N/A	-5	-4.9	-5.1		D	1200	N/A	N/A	N/A	N/A	N/A	N/A	0.0106	A	E?	2.32	A	N/A	A	E?	2.65E-06	N/A	N/A	N/A	N/A	N/A	N/A	N/A	N/A	N/A	N/A	N/A	N/A	N/A
	12CD	H2O			0		N/A	NO	NO	Cylindrical	50.8	127	N/A	N/A	N/A	-5	-4.9	-5.1		D	1200	N/A	N/A	N/A	N/A	N/A	N/A	0.0111	A	E?	3.37	A	N/A	A	E?	8.35E-06	N/A	N/A	N/A	N/A	N/A	N/A	N/A	N/A	N/A	N/A	N/A	N/A	N/A
	13CD	H2O			0		N/A	NO	NO	Cylindrical	50.8	127	N/A	N/A	N/A	-5	-4.9	-5.1		D	1200	N/A	N/A	N/A	N/A	N/A	N/A	0.012	A	E?	3.47	A	N/A	A	E?	1.13E-05	N/A	N/A	N/A	N/A	N/A	N/A	N/A	N/A	N/A	N/A	N/A	N/A	N/A
	14CD	H2O			0		N/A	NO	NO	Cylindrical	50.8	127	N/A	N/A	N/A	-5	-4.9	-5.1		D	1200	N/A	N/A	N/A	N/A	N/A	N/A	0.0093	A	E?	3.63	A	N/A	A	E?	2.20E-05	N/A	N/A	N/A	N/A	N/A	N/A	N/A	N/A	N/A	N/A	N/A	N/A	N/A
	16CD	H2O			0		N/A	NO	NO	Cylindrical	50.8	127	N/A	N/A	N/A	-5	-4.9	-5.1		D	1200	N/A	N/A	N/A	N/A	N/A	N/A	0.0023	A	E?	5.5	A	N/A	A	E?	8.32E-05	N/A	N/A	N/A	N/A	N/A	N/A	N/A	N/A	N/A	N/A	N/A	N/A	N/A
	22CD	H2O			0		N/A	NO	NO	Cylindrical	50.8	127	N/A	N/A	N/A	-5	-4.9	-5.1		D	1200	N/A	N/A	N/A	N/A	N/A	N/A	0.0025	A	E?	7.48	A	N/A	A	E?	7.95E-04	N/A	N/A	N/A	N/A	N/A	N/A	N/A	N/A	N/A	N/A	N/A	N/A	N/A
	23CD	H2O			0		N/A	NO	NO	Cylindrical	50.8	127	N/A	N/A	N/A	-5	-4.9	-5.1		D	1200	N/A	N/A	N/A	N/A	N/A	N/A	0.0038	A	E?	10.02	A	N/A	A	E?	1.14E-03	N/A	N/A	N/A	N/A	N/A	N/A	N/A	N/A	N/A	N/A	N/A	N/A	N/A
	24CD	H2O			0		N/A	NO	NO	Cylindrical	50.8	127	N/A	N/A	N/A	-5	-4.9	-5.1		D	1200	N/A	N/A	N/A	N/A	N/A	N/A	0.0039	A	E?	5.14	A	N/A	A	E?	1.03E-04	N/A	N/A	N/A	N/A	N/A	N/A	N/A	N/A	N/A	N/A	N/A	N/A	N/A
	31CD	H2O			0		N/A	NO	NO	Cylindrical	50.8	127	N/A	N/A	N/A	-5	-4.9	-5.1		D	1200	N/A	N/A	N/A	N/A	N/A	N/A	0.0093	A	E?	4.08	A	N/A	A	E?	5.14E-05	N/A	N/A	N/A	N/A	N/A	N/A	N/A	N/A	N/A	N/A	N/A	N/A	N/A
	35CD	H2O			0		N/A	NO	NO	Cylindrical	50.8	127	N/A	N/A	N/A	-5	-4.9	-5.1		D	1200	N/A	N/A	N/A	N/A	N/A	N/A	0.0126	A	E?	2.06	A	N/A	A	E?	2.30E-06	N/A	N/A	N/A	N/A	N/A	N/A	N/A	N/A	N/A	N/A	N/A	N/A	N/A
	39CD	H2O			0		N/A	NO	NO	Cylindrical	50.8	127	N/A	N/A	N/A	-5	-4.9	-5.1		D	1200	N/A	N/A	N/A	N/A	N/A	N/A	0.0112	A	E?	3.23	A	N/A	A	E?	1.23E-05	N/A	N/A	N/A	N/A	N/A	N/A	N/A	N/A	N/A	N/A	N/A	N/A	N/A
	40CD	H2O			0		N/A	NO	NO	Cylindrical	50.8	127	N/A	N/A	N/A	-5	-4.9	-5.1		D	1200	N/A	N/A	N/A	N/A	N/A	N/A	0.0101	A	E?	3.18	A	N/A	A	E?	1.34E-05	N/A	N/A	N/A	N/A	N/A	N/A	N/A	N/A	N/A	N/A	N/A	N/A	N/A
	43CD	H2O			0		N/A	NO	NO	Cylindrical	50.8	127	N/A	N/A	N/A	-5	-4.9	-5.1		D	1200	N/A	N/A	N/A	N/A	N/A	N/A	0.0109	A	E?	3.21	A	N/A	A	E?	1.15E-05	N/A	N/A	N/A	N/A	N/A	N/A	N/A	N/A	N/A	N/A	N/A	N/A	N/A
	46CD	H2O			0		N/A	NO	NO	Cylindrical	50.8	127	N/A	N/A	N/A	-5	-4.9	-5.1		D	1200	N/A	N/A	N/A	N/A	N/A	N/A	0.0088	A	E?	3.2	A	N/A	A	E?	1.32E-05	N/A	N/A	N/A	N/A	N/A	N/A	N/A	N/A	N/A	N/A	N/A	N/A	N/A
	52CD	H2O			0		N/A	NO	NO	Cylindrical	50.8	127	N/A	N/A	N/A	-5	-4.9	-5.1		D	1200	N/A	N/A	N/A	N/A	N/A	N/A	0.0124	A	E?	1.67	A	N/A	A	E?	1.63E-06	N/A	N/A	N/A	N/A	N/A	N/A	N/A	N/A	N/A	N/A	N/A	N/A	N/A
	54CD	H2O			0		N/A	NO	NO	Cylindrical	50.8	127	N/A	N/A	N/A	-5	-4.9	-5.1		D	1200	N/A	N/A	N/A	N/A	N/A	N/A	0.0117	A	E?	1.62	A	N/A	A	E?	1.64E-06	N/A	N/A	N/A	N/A	N/A	N/A	N/A	N/A	N/A	N/A	N/A	N/A	N/A
	117CD	H2O			0		N/A	NO	NO	Cylindrical	50.8	127	N/A	N/A	N/A	-5	-4.9	-5.1		D	1200	N/A	N/A	N/A	N/A	N/A	N/A	0.008	A	E?	0.69	A	N/A	A	E?	1.00E-07	N/A	N/A	N/A	N/A	N/A	N/A	N/A	N/A	N/A	N/A	N/A	N/A	N/A
	119CD	H2O			0		N/A	YES	NO	Cylindrical	50.8	127	N/A	N/A	N/A	-5	-4.9	-5.1		D	1200	N/A	N/A	N/A	N/A	N/A	N/A	0.0127	A	E?	1.45	A	N/A	A	E?	1.15E-06	N/A	N/A	N/A	N/A	N/A	N/A	N/A	N/A	N/A	N/A	N/A	N/A	N/A
	121CD	H2O			0		N/A	YES	NO	Cylindrical	50.8	127	N/A	N/A	N/A	-5	-4.9	-5.1		D	1200	N/A	N/A	N/A	N/A	N/A	N/A	0.0124	A	E?	1.24	A	N/A	A	E?	7.80E-07	N/A	N/A	N/A	N/A	N/A	N/A	N/A	N/A	N/A	N/A	N/A	N/A	N/A
	122CD	H2O			0		N/A	YES	NO	Cylindrical	50.8	127	N/A	N/A	N/A	-5	-4.9	-5.1		D	1200	N/A	N/A	N/A	N/A	N/A	N/A	0.012	A	E?	1.15	A	N/A	A	E?	5.30E-07	N/A	N/A	N/A	N/A	N/A	N/A	N/A	N/A	N/A	N/A	N/A	N/A	N/A
	123CD	H2O			0		N/A	NO	NO	Cylindrical	50.8	127	N/A	N/A	N/A	-5	-4.9	-5.1		D	1200	N/A	N/A	N/A	N/A	N/A	N/A	0.01	A	E?	2	A	N/A	A	E?	2.25E-06	N/A	N/A	N/A	N/A	N/A	N/A	N/A	N/A	N/A	N/A	N/A	N/A	N/A
	125CD	H2O			0		N/A	YES	NO	Cylindrical	50.8	127	N/A	N/A	N/A	-5	-4.9	-5.1		D	1200	N/A	N/A	N/A	N/A	N/A	N/A	0.0104	A	E?	1.34	A	N/A	A	E?	7.80E-07	N/A	N/A	N/A	N/A	N/A	N/A	N/A	N/A	N/A	N/A	N/A	N/A	N/A
Jones & Chew (1983)	2	H2O	Constant displacement rate	Uniaxial compression	0	Example creep curves (Fig. 1). Summary data in a table (Table 1).	N/A	NO	NO	Cylindrical	20	60	N/A	N/A	N/A	-10	-9.5	-10.5	Page 130	D	1130	N/A	N/A	N/A	N/A	N/A	N/A	0.0123	A	E	7.64	A	Stress is not corrected to sample surface expansion (page 130).	A	E	5.50E-04	N/A	N/A	N/A	Figures of samples geometry show cracks (Figs, 2, 3; page 130).	N/A	N/A	N/A	N/A	N/A	N/A	N/A	N/A	N/A
	3	H2O			0		N/A	NO	NO	Cylindrical	20	60	N/A	N/A	N/A	-10	-9.5	-10.5		D	1300	N/A	N/A	N/A	N/A	N/A	N/A	0.0079	A	E	7.06	A		A	E	5.50E-04	N/A	N/A	N/A		N/A	N/A	N/A	N/A	N/A	N/A	N/A	N/A	N/A
	4	H2O			0		N/A	NO	NO	Cylindrical	20	60	N/A	N/A	N/A	-10	-9.5	-10.5		D	1300	N/A	N/A	N/A	N/A	N/A	N/A	0.0079	A	E	7	A		A	E	5.50E-04	N/A	N/A	N/A		N/A	N/A	N/A	N/A	N/A	N/A	N/A	N/A	N/A
	5	H2O			0		N/A	NO	NO	Cylindrical	20	60	N/A	N/A	N/A	-10	-9.5	-10.5		D	1300	N/A	N/A	N/A	N/A	N/A	N/A	0.0079	A	E	6.98	A		A	E	5.50E-04	N/A	N/A	N/A		N/A	N/A	N/A	N/A	N/A	N/A	N/A	N/A	N/A
	10	H2O			0		N/A	NO	NO	Cylindrical	20	60	N/A	N/A	N/A	-10	-9.5	-10.5		D	1300	N/A	N/A	N/A	N/A	N/A	N/A	0.015	A	E	6.88	A		A	E	5.50E-04	N/A	N/A	N/A		N/A	N/A	N/A	N/A	N/A	N/A	N/A	N/A	N/A
	12	H2O			0		N/A	NO	NO	Cylindrical	20	60	N/A	N/A	N/A	-10	-9.5	-10.5		D	1300	N/A	N/A	N/A	N/A	N/A	N/A	0.0119	A	E	6.56	A		A	E	5.50E-04	N/A	N/A	N/A		N/A	N/A	N/A	N/A	N/A	N/A	N/A	N/A	N/A
	13	H2O			0		N/A	NO	NO	Cylindrical	20	60	N/A	N/A	N/A	-10	-9.5	-10.5		D	1300	N/A	N/A	N/A	N/A	N/A	N/A	0.0096	A	E	6.94	A		A	E	5.50E-04	N/A	N/A	N/A		N/A	N/A	N/A	N/A	N/A	N/A	N/A	N/A	N/A
	15	H2O			0		N/A	NO	NO	Cylindrical	20	60	N/A	N/A	N/A	-10	-9.5	-10.5		D	1100	N/A	N/A	N/A	N/A	N/A	N/A	0.0062	A	E	8.76	A		A	E	5.50E-04	N/A	N/A	N/A		N/A	N/A	N/A	N/A	N/A	N/A	N/A	N/A	N/A
	18	H2O			0		N/A	NO	NO	Cylindrical	20	60	N/A	N/A	N/A	-10	-9.5	-10.5		D	1200	N/A	N/A	N/A	N/A	N/A	N/A	0.0039	A	E	7.46	A		A	E	5.50E-04	N/A	N/A	N/A		N/A	N/A	N/A	N/A	N/A	N/A	N/A	N/A	N/A
	25	H2O			0		N/A	NO	NO	Cylindrical	20	60	N/A	N/A	N/A	-10	-9.5	-10.5		D	900	N/A	N/A	N/A	N/A	N/A	N/A	0.0099	A	E	7.11	A		A	E	5.50E-04	N/A	N/A	N/A		N/A	N/A	N/A	N/A	N/A	N/A	N/A	N/A	N/A
	26	H2O			0		N/A	NO	NO	Cylindrical	20	60	N/A	N/A	N/A	-10	-9.5	-10.5		D	1000	N/A	N/A	N/A	N/A	N/A	N/A	0.0059	A	E	7.49	A		A	E	5.50E-04	N/A	N/A	N/A		N/A	N/A	N/A	N/A	N/A	N/A	N/A	N/A	N/A
	27	H2O			0		N/A	NO	NO	Cylindrical	20	60	N/A	N/A	N/A	-10	-9.5	-10.5		D	900	N/A	N/A	N/A	N/A	N/A	N/A	0.0056	A	E	7.79	A		A	E	5.50E-04	N/A	N/A	N/A		N/A	N/A	N/A	N/A	N/A	N/A	N/A	N/A	N/A
	28	H2O			0		N/A	NO	NO	Cylindrical	20	60	N/A	N/A	N/A	-10	-9.5	-10.5		D	1000	N/A	N/A	N/A	N/A	N/A	N/A	0.0069	A	E	7.47	A		A	E	5.50E-04	N/A	N/A	N/A		N/A	N/A	N/A	N/A	N/A	N/A	N/A	N/A	N/A
	29	H2O			0		N/A	NO	NO	Cylindrical	20	60	N/A	N/A	N/A	-10	-9.5	-10.5		D	1200	N/A	N/A	N/A	N/A	N/A	N/A	0.0056	A	E	7.88	A		A	E	5.50E-04	N/A	N/A	N/A		N/A	N/A	N/A	N/A	N/A	N/A	N/A	N/A	N/A
	30	H2O			0		N/A	NO	NO	Cylindrical	20	60	N/A	N/A	N/A	-10	-9.5	-10.5		D	1200	N/A	N/A	N/A	N/A	N/A	N/A	0.0069	A	E	7.66	A		A	E	5.50E-04	N/A	N/A	N/A		N/A	N/A	N/A	N/A	N/A	N/A	N/A	N/A	N/A
	31	H2O			0		N/A	NO	NO	Cylindrical	20	60	N/A	N/A	N/A	-10	-9.5	-10.5		D	1300	N/A	N/A	N/A	N/A	N/A	N/A	0.0066	A	E	7.57	A		A	E	5.50E-04	N/A	N/A	N/A		N/A	N/A	N/A	N/A	N/A	N/A	N/A	N/A	N/A
	32	H2O			0		N/A	NO	NO	Cylindrical	20	60	N/A	N/A	N/A	-10	-9.5	-10.5		D	1300	N/A	N/A	N/A	N/A	N/A	N/A	0.0069	A	E	8.03	A		A	E	5.50E-04	N/A	N/A	N/A		N/A	N/A	N/A	N/A	N/A	N/A	N/A	N/A	N/A
	33	H2O			0		N/A	NO	NO	Cylindrical	20	60	N/A	N/A	N/A	-10	-9.5	-10.5		D	1500	N/A	N/A	N/A	N/A	N/A	N/A	0.0059	A	E	7.75	A		A	E	5.50E-04	N/A	N/A	N/A		N/A	N/A	N/A	N/A	N/A	N/A	N/A	N/A	N/A
	34	H2O			0		N/A	NO	NO	Cylindrical	20	60	N/A	N/A	N/A	-10	-9.5	-10.5		D	1400	N/A	N/A	N/A	N/A	N/A	N/A	0.0066	A	E	8.53	A		A	E	5.50E-04	N/A	N/A	N/A		N/A	N/A	N/A	N/A	N/A	N/A	N/A	N/A	N/A
	35	H2O			0		N/A	NO	NO	Cylindrical	20	60	N/A	N/A	N/A	-10	-9.5	-10.5		D	1700	N/A	N/A	N/A	N/A	N/A	N/A	0.0066	A	E	6.91	A		A	E	5.50E-04	N/A	N/A	N/A		N/A	N/A	N/A	N/A	N/A	N/A	N/A	N/A	N/A
	36	H2O			0		N/A	NO	NO	Cylindrical	20	60	N/A	N/A	N/A	-10	-9.5	-10.5		D	1300	N/A	N/A	N/A	N/A	N/A	N/A	0.0079	A	E	6.59	A		A	E	5.50E-04	N/A	N/A	N/A		N/A	N/A	N/A	N/A	N/A	N/A	N/A	N/A	N/A
	37	H2O			0		N/A	NO	NO	Cylindrical	20	60	N/A	N/A	N/A	-10	-9.5	-10.5		D	1200	N/A	N/A	N/A	N/A	N/A	N/A	0.0059	A	E	7.11	A		A	E	5.50E-04	N/A	N/A	N/A		N/A	N/A	N/A	N/A	N/A	N/A	N/A	N/A	N/A
	38	H2O			0		N/A	NO	NO	Cylindrical	20	60	N/A	N/A	N/A	-10	-9.5	-10.5		D	1300	N/A	N/A	N/A	N/A	N/A	N/A	0.0056	A	E	7.02	A		A	E	5.50E-04	N/A	N/A	N/A		N/A	N/A	N/A	N/A	N/A	N/A	N/A	N/A	N/A
	39	H2O			0		N/A	NO	NO	Cylindrical	20	60	N/A	N/A	N/A	-10	-9.5	-10.5		D	1300	N/A	N/A	N/A	N/A	N/A	N/A	0.0049	A	E	7.79	A		A	E	5.50E-04	N/A	N/A	N/A		N/A	N/A	N/A	N/A	N/A	N/A	N/A	N/A	N/A
	40	H2O			0		N/A	NO	NO	Cylindrical	20	60	N/A	N/A	N/A	-10	-9.5	-10.5		D	1400	N/A	N/A	N/A	N/A	N/A	N/A	0.0056	A	E	8.32	A		A	E	5.50E-04	N/A	N/A	N/A		N/A	N/A	N/A	N/A	N/A	N/A	N/A	N/A	N/A
	41	H2O			0		N/A	NO	NO	Cylindrical	20	60	N/A	N/A	N/A	-10	-9.5	-10.5		D	1800	N/A	N/A	N/A	N/A	N/A	N/A	0.0059	A	E	7.75	A		A	E	5.50E-04	N/A	N/A	N/A		N/A	N/A	N/A	N/A	N/A	N/A	N/A	N/A	N/A
	42	H2O			0		N/A	NO	NO	Cylindrical	20	60	N/A	N/A	N/A	-10	-9.5	-10.5		D	1100	N/A	N/A	N/A	N/A	N/A	N/A	0.0069	A	E	7.6	A		A	E	5.50E-04	N/A	N/A	N/A		N/A	N/A	N/A	N/A	N/A	N/A	N/A	N/A	N/A
	43	H2O			0		N/A	NO	NO	Cylindrical	20	60	N/A	N/A	N/A	-10	-9.5	-10.5		D	1000	N/A	N/A	N/A	N/A	N/A	N/A	0.0049	A	E	7.43	A		A	E	5.50E-04	N/A	N/A	N/A		N/A	N/A	N/A	N/A	N/A	N/A	N/A	N/A	N/A
	44	H2O			0		N/A	NO	NO	Cylindrical	20	60	N/A	N/A	N/A	-10	-9.5	-10.5		D	1000	N/A	N/A	N/A	N/A	N/A	N/A	0.0061	A	E	7.71	A		A	E	5.50E-04	N/A	N/A	N/A		N/A	N/A	N/A	N/A	N/A	N/A	N/A	N/A	N/A
	45	H2O			0		N/A	NO	NO	Cylindrical	20	60	N/A	N/A	N/A	-10	-9.5	-10.5		D	1000	N/A	N/A	N/A	N/A	N/A	N/A	0.0061	A	E	7.78	A		A	E	5.50E-04	N/A	N/A	N/A		N/A	N/A	N/A	N/A	N/A	N/A	N/A	N/A	N/A
	46	H2O			0		N/A	NO	NO	Cylindrical	20	60	N/A	N/A	N/A	-10	-9.5	-10.5		D	950	N/A	N/A	N/A	N/A	N/A	N/A	0.0054	A	E	8.43	A		A	E	5.50E-04	N/A	N/A	N/A		N/A	N/A	N/A	N/A	N/A	N/A	N/A	N/A	N/A
	47	H2O			0		N/A	NO	NO	Cylindrical	20	60	N/A	N/A	N/A	-10	-9.5	-10.5		D	1400	N/A	N/A	N/A	N/A	N/A	N/A	0.0054	A	E	8.58	A		A	E	5.50E-04	N/A	N/A	N/A		N/A	N/A	N/A	N/A	N/A	N/A	N/A	N/A	N/A
	48	H2O			0		N/A	NO	NO	Cylindrical	20	60	N/A	N/A	N/A	-10	-9.5	-10.5		D	1400	N/A	N/A	N/A	N/A	N/A	N/A	0.0054	A	E	7.75	A		A	E	5.50E-04	N/A	N/A	N/A		N/A	N/A	N/A	N/A	N/A	N/A	N/A	N/A	N/A
	49	H2O			0		N/A	NO	NO	Cylindrical	20	60	N/A	N/A	N/A	-10	-9.5	-10.5		D	890	N/A	N/A	N/A	N/A	N/A	N/A	0.0071	A	E	8.82	A		A	E	5.50E-04	N/A	N/A	N/A		N/A	N/A	N/A	N/A	N/A	N/A	N/A	N/A	N/A
	50	H2O			0		N/A	NO	NO	Cylindrical	20	60	N/A	N/A	N/A	-10	-9.5	-10.5		D	800	N/A	N/A	N/A	N/A	N/A	N/A	0.0088	A	E	7.24	A		A	E	5.50E-04	N/A	N/A	N/A		N/A	N/A	N/A	N/A	N/A	N/A	N/A	N/A	N/A
	51	H2O			0		N/A	NO	NO	Cylindrical	20	60	N/A	N/A	N/A	-10	-9.5	-10.5		D	800	N/A	N/A	N/A	N/A	N/A	N/A	0.0061	A	E	7.25	A		A	E	5.50E-04	N/A	N/A	N/A		N/A	N/A	N/A	N/A	N/A	N/A	N/A	N/A	N/A
	52	H2O			0		N/A	NO	NO	Cylindrical	20	60	N/A	N/A	N/A	-10	-9.5	-10.5		D	800	N/A	N/A	N/A	N/A	N/A	N/A	0.0066	A	E	8.56	A		A	E	5.50E-04	N/A	N/A	N/A		N/A	N/A	N/A	N/A	N/A	N/A	N/A	N/A	N/A
	53	H2O			0		N/A	NO	NO	Cylindrical	20	60	N/A	N/A	N/A	-10	-9.5	-10.5		D	800	N/A	N/A	N/A	N/A	N/A	N/A	0.0061	A	E	7.7	A		A	E	5.50E-04	N/A	N/A	N/A		N/A	N/A	N/A	N/A	N/A	N/A	N/A	N/A	N/A
	54	H2O			0		N/A	NO	NO	Cylindrical	20	60	N/A	N/A	N/A	-10	-9.5	-10.5		D	1100	N/A	N/A	N/A	N/A	N/A	N/A	0.0054	A	E	8.02	A		A	E	5.50E-04	N/A	N/A	N/A		N/A	N/A	N/A	N/A	N/A	N/A	N/A	N/A	N/A
	55	H2O			0		N/A	NO	NO	Cylindrical	20	60	N/A	N/A	N/A	-10	-9.5	-10.5		D	1100	N/A	N/A	N/A	N/A	N/A	N/A	0.0054	A	E	8.38	A		A	E	5.50E-04	N/A	N/A	N/A		N/A	N/A	N/A	N/A	N/A	N/A	N/A	N/A	N/A
	56	H2O			0		N/A	NO	NO	Cylindrical	20	60	N/A	N/A	N/A	-10	-9.5	-10.5		D	930	N/A	N/A	N/A	N/A	N/A	N/A	0.0054	A	E	7.94	A		A	E	5.50E-04	N/A	N/A	N/A		N/A	N/A	N/A	N/A	N/A	N/A	N/A	N/A	N/A
	57	H2O			0		N/A	NO	NO	Cylindrical	20	60	N/A	N/A	N/A	-10	-9.5	-10.5		D	930	N/A	N/A	N/A	N/A	N/A	N/A	0.0061	A	E	7.59	A		A	E	5.50E-04	N/A	N/A	N/A		N/A	N/A	N/A	N/A	N/A	N/A	N/A	N/A	N/A
	58	H2O			0		N/A	NO	NO	Cylindrical	20	60	N/A	N/A	N/A	-10	-9.5	-10.5		D	930	N/A	N/A	N/A	N/A	N/A	N/A	0.0104	A	E	6.45	A		A	E	5.50E-04	N/A	N/A	N/A		N/A	N/A	N/A	N/A	N/A	N/A	N/A	N/A	N/A
	59	H2O			0		N/A	NO	NO	Cylindrical	34	102	N/A	N/A	N/A	-10	-9.5	-10.5		D	9720	N/A	N/A	N/A	N/A	N/A	N/A	0.0086	A	E	7.26	A		A	E	5.50E-04	N/A	N/A	N/A		N/A	N/A	N/A	N/A	N/A	N/A	N/A	N/A	N/A
	60	H2O			0		N/A	NO	NO	Cylindrical	20	60	N/A	N/A	N/A	-10	-9.5	-10.5		D	710	N/A	N/A	N/A	N/A	N/A	N/A	0.0066	A	E	7.15	A		A	E	5.50E-04	N/A	N/A	N/A		N/A	N/A	N/A	N/A	N/A	N/A	N/A	N/A	N/A
	61	H2O			0		N/A	NO	NO	Cylindrical	20	60	N/A	N/A	N/A	-10	-9.5	-10.5		D	710	N/A	N/A	N/A	N/A	N/A	N/A	0.0087	A	E	6.91	A		A	E	5.50E-04	N/A	N/A	N/A		N/A	N/A	N/A	N/A	N/A	N/A	N/A	N/A	N/A
	62	H2O			0		N/A	NO	NO	Cylindrical	20	60	N/A	N/A	N/A	-10	-9.5	-10.5		D	800	N/A	N/A	N/A	N/A	N/A	N/A	0.0054	A	E	7.29	A		A	E	5.50E-04	N/A	N/A	N/A		N/A	N/A	N/A	N/A	N/A	N/A	N/A	N/A	N/A
	63	H2O			0		N/A	NO	NO	Cylindrical	34	102	N/A	N/A	N/A	-10	-9.5	-10.5		D	1940	N/A	N/A	N/A	N/A	N/A	N/A	0.006	A	E	6.52	A		A	E	5.50E-04	N/A	N/A	N/A		N/A	N/A	N/A	N/A	N/A	N/A	N/A	N/A	N/A
	64	H2O			0		N/A	NO	NO	Cylindrical	34	102	N/A	N/A	N/A	-10	-9.5	-10.5		D	1630	N/A	N/A	N/A	N/A	N/A	N/A	0.0062	A	E	7.08	A		A	E	5.50E-04	N/A	N/A	N/A		N/A	N/A	N/A	N/A	N/A	N/A	N/A	N/A	N/A
	65	H2O			0		N/A	NO	NO	Cylindrical	20	60	N/A	N/A	N/A	-10	-9.5	-10.5		D	670	N/A	N/A	N/A	N/A	N/A	N/A	0.0088	A	E	7.28	A		A	E	5.50E-04	N/A	N/A	N/A		N/A	N/A	N/A	N/A	N/A	N/A	N/A	N/A	N/A
	67	H2O			0		N/A	NO	NO	Cylindrical	34	102	N/A	N/A	N/A	-10	-9.5	-10.5		D	1880	N/A	N/A	N/A	N/A	N/A	N/A	0.0106	A	E	7.06	A		A	E	5.50E-04	N/A	N/A	N/A		N/A	N/A	N/A	N/A	N/A	N/A	N/A	N/A	N/A
	68	H2O			0		N/A	NO	NO	Cylindrical	34	102	N/A	N/A	N/A	-10	-9.5	-10.5		D	1630	N/A	N/A	N/A	N/A	N/A	N/A	0.0062	A	E	7.15	A		A	E	5.50E-04	N/A	N/A	N/A		N/A	N/A	N/A	N/A	N/A	N/A	N/A	N/A	N/A
	69	H2O			0		N/A	NO	NO	Cylindrical	20	60	N/A	N/A	N/A	-10	-9.5	-10.5		D	1450	N/A	N/A	N/A	N/A	N/A	N/A	0.0053	A	E	8.07	A		A	E	5.50E-04	N/A	N/A	N/A		N/A	N/A	N/A	N/A	N/A	N/A	N/A	N/A	N/A
	70	H2O			0		N/A	NO	NO	Cylindrical	34	102	N/A	N/A	N/A	-10	-9.5	-10.5		D	1940	N/A	N/A	N/A	N/A	N/A	N/A	0.0104	A	E	7.28	A		A	E	5.50E-04	N/A	N/A	N/A		N/A	N/A	N/A	N/A	N/A	N/A	N/A	N/A	N/A
	71	H2O			0		N/A	NO	NO	Cylindrical	20	60	N/A	N/A	N/A	-10	-9.5	-10.5		D	1560	N/A	N/A	N/A	N/A	N/A	N/A	0.0098	A	E	7.29	A		A	E	5.50E-04	N/A	N/A	N/A		N/A	N/A	N/A	N/A	N/A	N/A	N/A	N/A	N/A
	72	H2O			0		N/A	NO	NO	Cylindrical	34	102	N/A	N/A	N/A	-10	-9.5	-10.5		D	1660	N/A	N/A	N/A	N/A	N/A	N/A	0.0065	A	E	8.15	A		A	E	5.50E-04	N/A	N/A	N/A		N/A	N/A	N/A	N/A	N/A	N/A	N/A	N/A	N/A
	73	H2O			0		N/A	NO	NO	Cylindrical	20	60	N/A	N/A	N/A	-10	-9.5	-10.5		D	690	N/A	N/A	N/A	N/A	N/A	N/A	0.0088	A	E	6.92	A		A	E	5.50E-04	N/A	N/A	N/A		N/A	N/A	N/A	N/A	N/A	N/A	N/A	N/A	N/A
	74	H2O			0		N/A	NO	NO	Cylindrical	20	60	N/A	N/A	N/A	-10	-9.5	-10.5		D	690	N/A	N/A	N/A	N/A	N/A	N/A	0.0099	A	E	7.2	A		A	E	5.50E-04	N/A	N/A	N/A		N/A	N/A	N/A	N/A	N/A	N/A	N/A	N/A	N/A
	75	H2O			0		N/A	NO	NO	Cylindrical	20	60	N/A	N/A	N/A	-10	-9.5	-10.5		D	690	N/A	N/A	N/A	N/A	N/A	N/A	0.0074	A	E	7.58	A		A	E	5.50E-04	N/A	N/A	N/A		N/A	N/A	N/A	N/A	N/A	N/A	N/A	N/A	N/A
	76	H2O			0		N/A	NO	NO	Cylindrical	20	60	N/A	N/A	N/A	-10	-9.5	-10.5		D	660	N/A	N/A	N/A	N/A	N/A	N/A	0.0066	A	E	7.36	A		A	E	5.50E-04	N/A	N/A	N/A		N/A	N/A	N/A	N/A	N/A	N/A	N/A	N/A	N/A
	79	H2O			0		N/A	NO	NO	Cylindrical	20	60	N/A	N/A	N/A	-10	-9.5	-10.5		D	560	N/A	N/A	N/A	N/A	N/A	N/A	0.0099	A	E	7.3	A		A	E	5.50E-04	N/A	N/A	N/A		N/A	N/A	N/A	N/A	N/A	N/A	N/A	N/A	N/A
	80	H2O			0		N/A	NO	NO	Cylindrical	20	60	N/A	N/A	N/A	-10	-9.5	-10.5		D	600	N/A	N/A	N/A	N/A	N/A	N/A	0.0055	A	E	8.65	A		A	E	5.50E-04	N/A	N/A	N/A		N/A	N/A	N/A	N/A	N/A	N/A	N/A	N/A	N/A
Durham et al. (1983)	11	H2O	Constant displacement rate	Uniaxial compression	100	Summary data in a table (Table 2).	N/A	NO	NO	Cylindrical	25.4	63.5	N/A	N/A	N/A	-78	-77.5	-78.5	T is piston temperature. T variation in the sample should be much lower (page B378).	D	1500	1000	2000	N/A	No	Light polarized photo	N/A	N/A	N/A	N/A	25	A	N/A	A	T	3.50E-06	N/A	N/A	N/A	N/A	N/A	N/A	N/A	N/A	N/A	N/A	N/A	N/A	N/A
	12	H2O			5		N/A	NO	NO	Cylindrical	25.4	63.5	N/A	N/A	N/A	-78	-77.5	-78.5		D	1500	1000	2000	N/A	No		N/A	N/A	N/A	N/A	22.9	A	N/A	A	T	3.50E-06	N/A	N/A	N/A	N/A	N/A	N/A	N/A	N/A	N/A	N/A	N/A	N/A	N/A
	14	H2O			50		N/A	NO	NO	Cylindrical	25.4	63.5	N/A	N/A	N/A	-78	-77.5	-78.5		D	1500	1000	2000	N/A	No		N/A	N/A	N/A	N/A	24.4	A	N/A	A	T	3.50E-06	N/A	N/A	N/A	N/A	N/A	N/A	N/A	N/A	N/A	N/A	N/A	N/A	N/A
	23	H2O			180		N/A	NO	NO	Cylindrical	25.4	63.5	N/A	N/A	N/A	-115	-114.5	-115.5		D	1500	1000	2000	N/A	No		N/A	N/A	N/A	N/A	67.1	A	N/A	A	T	3.50E-06	N/A	N/A	N/A	N/A	N/A	N/A	N/A	N/A	N/A	N/A	N/A	N/A	N/A
	24	H2O			120		N/A	NO	NO	Cylindrical	25.4	63.5	N/A	N/A	N/A	-115	-114.5	-115.5		D	1500	1000	2000	N/A	No		N/A	N/A	N/A	N/A	87.2	A	N/A	A	T	3.50E-06	N/A	N/A	N/A	N/A	N/A	N/A	N/A	N/A	N/A	N/A	N/A	N/A	N/A
	25	H2O			90		N/A	NO	NO	Cylindrical	25.4	63.5	N/A	N/A	N/A	-115	-114.5	-115.5		D	1500	1000	2000	N/A	No		N/A	N/A	N/A	N/A	93.9	A	N/A	A	T	3.50E-06	N/A	N/A	N/A	N/A	N/A	N/A	N/A	N/A	N/A	N/A	N/A	N/A	N/A
	29	H2O			60		N/A	NO	NO	Cylindrical	25.4	63.5	N/A	N/A	N/A	-115	-114.5	-115.5		D	1500	1000	2000	N/A	No		N/A	N/A	N/A	N/A	99.4	A	N/A	A	T	3.50E-06	N/A	N/A	N/A	N/A	N/A	N/A	N/A	N/A	N/A	N/A	N/A	N/A	N/A
	30	H2O			200		N/A	NO	NO	Cylindrical	25.4	63.5	N/A	N/A	N/A	-78	-77.5	-78.5		D	1500	1000	2000	N/A	No		N/A	N/A	N/A	N/A	51.2	A	N/A	A	T	3.50E-04	N/A	N/A	N/A	N/A	N/A	N/A	N/A	N/A	N/A	N/A	N/A	N/A	N/A
	31	H2O			200		N/A	NO	NO	Cylindrical	25.4	63.5	N/A	N/A	N/A	-78	-77.5	-78.5		D	1500	1000	2000	N/A	No		N/A	N/A	N/A	N/A	10.7	A	N/A	A	T	3.50E-06	N/A	N/A	N/A	N/A	N/A	N/A	N/A	N/A	N/A	N/A	N/A	N/A	N/A
	37	H2O			100		N/A	NO	NO	Cylindrical	25.4	63.5	N/A	N/A	N/A	-78	-77.5	-78.5		D	1500	1000	2000	N/A	No		N/A	N/A	N/A	N/A	65.5	A	N/A	A	T	3.50E-04	N/A	N/A	N/A	N/A	N/A	N/A	N/A	N/A	N/A	N/A	N/A	N/A	N/A
	38	H2O			50		N/A	NO	NO	Cylindrical	25.4	63.5	N/A	N/A	N/A	-78	-77.5	-78.5		D	1500	1000	2000	N/A	No		N/A	N/A	N/A	N/A	63.7	A	N/A	A	T	3.50E-04	N/A	N/A	N/A	N/A	N/A	N/A	N/A	N/A	N/A	N/A	N/A	N/A	N/A
	39	H2O			150		N/A	NO	NO	Cylindrical	25.4	63.5	N/A	N/A	N/A	-78	-77.5	-78.5		D	1500	1000	2000	N/A	No		N/A	N/A	N/A	N/A	58.6	A	N/A	A	T	3.50E-04	N/A	N/A	N/A	N/A	N/A	N/A	N/A	N/A	N/A	N/A	N/A	N/A	N/A
	40	H2O			200		N/A	NO	NO	Cylindrical	25.4	63.5	N/A	N/A	N/A	-78	-77.5	-78.5		D	1500	1000	2000	N/A	No		N/A	N/A	N/A	N/A	48.8	A	N/A	A	T	3.50E-04	N/A	N/A	N/A	N/A	N/A	N/A	N/A	N/A	N/A	N/A	N/A	N/A	N/A
	41	H2O			225		N/A	NO	NO	Cylindrical	25.4	63.5	N/A	N/A	N/A	-78	-77.5	-78.5		D	1500	1000	2000	N/A	No		N/A	N/A	N/A	N/A	25.6	A	N/A	A	T	3.50E-04	N/A	N/A	N/A	N/A	N/A	N/A	N/A	N/A	N/A	N/A	N/A	N/A	N/A
	42	H2O			200		N/A	NO	NO	Cylindrical	25.4	63.5	N/A	N/A	N/A	-78	-77.5	-78.5		D	1500	1000	2000	N/A	No		N/A	N/A	N/A	N/A	45.1	A	N/A	A	T	3.50E-04	N/A	N/A	N/A	N/A	N/A	N/A	N/A	N/A	N/A	N/A	N/A	N/A	N/A
	43	H2O			200		N/A	NO	NO	Cylindrical	25.4	63.5	N/A	N/A	N/A	-78	-77.5	-78.5		D	1500	1000	2000	N/A	No		N/A	N/A	N/A	N/A	51.8	A	N/A	A	T	3.50E-04	N/A	N/A	N/A	N/A	N/A	N/A	N/A	N/A	N/A	N/A	N/A	N/A	N/A
	44-1	H2O			100		N/A	NO	NO	Cylindrical	25.4	63.5	N/A	N/A	N/A	-78	-77.5	-78.5		D	1500	1000	2000	N/A	No		N/A	N/A	N/A	N/A	75.6	A	N/A	A	T	3.50E-04	N/A	N/A	N/A	N/A	N/A	N/A	N/A	N/A	N/A	N/A	N/A	N/A	N/A
	44-2	H2O			100		N/A	NO	NO	Cylindrical	25.4	63.5	N/A	N/A	N/A	-78	-77.5	-78.5		D	1500	1000	2000	N/A	No		N/A	N/A	N/A	N/A	N/A	A	N/A	A	T	3.50E-06	N/A	N/A	N/A	N/A	N/A	N/A	N/A	N/A	N/A	N/A	N/A	N/A	N/A
	44-3	H2O			100		N/A	NO	NO	Cylindrical	25.4	63.5	N/A	N/A	N/A	-78	-77.5	-78.5		D	1500	1000	2000	N/A	No		N/A	N/A	N/A	N/A	N/A	A	N/A	A	T	3.50E-04	N/A	N/A	N/A	N/A	N/A	N/A	N/A	N/A	N/A	N/A	N/A	N/A	N/A
	44-4	H2O			100		N/A	NO	NO	Cylindrical	25.4	63.5	N/A	N/A	N/A	-78	-77.5	-78.5		D	1500	1000	2000	N/A	No		N/A	N/A	N/A	N/A	N/A	A	N/A	A	T	3.50E-06	N/A	N/A	N/A	N/A	N/A	N/A	N/A	N/A	N/A	N/A	N/A	N/A	N/A
	44-5	H2O			100		N/A	NO	NO	Cylindrical	25.4	63.5	N/A	N/A	N/A	-78	-77.5	-78.5		D	1500	1000	2000	N/A	No		N/A	N/A	N/A	N/A	N/A	A	N/A	A	T	3.50E-04	N/A	N/A	N/A	N/A	N/A	N/A	N/A	N/A	N/A	N/A	N/A	N/A	N/A
	55-1	H2O			38.8		N/A	NO	NO	Cylindrical	25.4	63.5	N/A	N/A	N/A	-115	-114.5	-115.5		D	1500	1000	2000	N/A	No		N/A	N/A	N/A	N/A	104.9	A	N/A	A	T	3.50E-06	N/A	N/A	N/A	N/A	N/A	N/A	N/A	N/A	N/A	N/A	N/A	N/A	N/A
	62-1	H2O			80		N/A	NO	NO	Cylindrical	25.4	63.5	N/A	N/A	N/A	-80	-79.5	-80.5		D	1500	1000	2000	N/A	No		N/A	N/A	N/A	N/A	65.9	A	N/A	A	T	3.50E-05	N/A	N/A	N/A	N/A	N/A	N/A	N/A	N/A	N/A	N/A	N/A	N/A	N/A
	62-2	H2O			80		N/A	NO	NO	Cylindrical	25.4	63.5	N/A	N/A	N/A	-80	-79.5	-80.5		D	1500	1000	2000	N/A	No		N/A	N/A	N/A	N/A	N/A	A	N/A	A	T	3.50E-06	N/A	N/A	N/A	N/A	N/A	N/A	N/A	N/A	N/A	N/A	N/A	N/A	N/A
	62-3	H2O			80		N/A	NO	NO	Cylindrical	25.4	63.5	N/A	N/A	N/A	-79	-78.5	-79.5		D	1500	1000	2000	N/A	No		N/A	N/A	N/A	N/A	N/A	A	N/A	A	T	3.50E-05	N/A	N/A	N/A	N/A	N/A	N/A	N/A	N/A	N/A	N/A	N/A	N/A	N/A
	62-4	H2O			80		N/A	NO	NO	Cylindrical	25.4	63.5	N/A	N/A	N/A	-78	-77.5	-78.5		D	1500	1000	2000	N/A	No		N/A	N/A	N/A	N/A	N/A	A	N/A	A	T	3.50E-04	N/A	N/A	N/A	N/A	N/A	N/A	N/A	N/A	N/A	N/A	N/A	N/A	N/A
	62-5	H2O			80		N/A	NO	NO	Cylindrical	25.4	63.5	N/A	N/A	N/A	-78	-77.5	-78.5		D	1500	1000	2000	N/A	No		N/A	N/A	N/A	N/A	N/A	A	N/A	A	T	3.50E-05	N/A	N/A	N/A	N/A	N/A	N/A	N/A	N/A	N/A	N/A	N/A	N/A	N/A
	63-1	H2O			125		N/A	NO	NO	Cylindrical	25.4	63.5	N/A	N/A	N/A	-78	-77.5	-78.5		D	1500	1000	2000	N/A	No		N/A	N/A	N/A	N/A	55.9	A	N/A	A	T	3.50E-05	N/A	N/A	N/A	N/A	N/A	N/A	N/A	N/A	N/A	N/A	N/A	N/A	N/A
	63-2	H2O			125		N/A	NO	NO	Cylindrical	25.4	63.5	N/A	N/A	N/A	-77	-76.5	-77.5		D	1500	1000	2000	N/A	No		N/A	N/A	N/A	N/A	N/A	A	N/A	A	T	3.50E-06	N/A	N/A	N/A	N/A	N/A	N/A	N/A	N/A	N/A	N/A	N/A	N/A	N/A
	63-3	H2O			125		N/A	NO	NO	Cylindrical	25.4	63.5	N/A	N/A	N/A	-79	-78.5	-79.5		D	1500	1000	2000	N/A	No		N/A	N/A	N/A	N/A	N/A	A	N/A	A	T	3.50E-05	N/A	N/A	N/A	N/A	N/A	N/A	N/A	N/A	N/A	N/A	N/A	N/A	N/A
	63-4	H2O			125		N/A	NO	NO	Cylindrical	25.4	63.5	N/A	N/A	N/A	-79	-78.5	-79.5		D	1500	1000	2000	N/A	No		N/A	N/A	N/A	N/A	N/A	A	N/A	A	T	3.50E-04	N/A	N/A	N/A	N/A	N/A	N/A	N/A	N/A	N/A	N/A	N/A	N/A	N/A
	63-5	H2O			125		N/A	NO	NO	Cylindrical	25.4	63.5	N/A	N/A	N/A	-78	-77.5	-78.5		D	1500	1000	2000	N/A	No		N/A	N/A	N/A	N/A	N/A	A	N/A	A	T	3.50E-06	N/A	N/A	N/A	N/A	N/A	N/A	N/A	N/A	N/A	N/A	N/A	N/A	N/A
	63-6	H2O			125		N/A	NO	NO	Cylindrical	25.4	63.5	N/A	N/A	N/A	-76	-75.5	-76.5		D	1500	1000	2000	N/A	No		N/A	N/A	N/A	N/A	N/A	A	N/A	A	T	3.50E-05	N/A	N/A	N/A	N/A	N/A	N/A	N/A	N/A	N/A	N/A	N/A	N/A	N/A
	63-7	H2O			125		N/A	NO	NO	Cylindrical	25.4	63.5	N/A	N/A	N/A	-76	-75.5	-76.5		D	1500	1000	2000	N/A	No		N/A	N/A	N/A	N/A	N/A	A	N/A	A	T	3.50E-04	N/A	N/A	N/A	N/A	N/A	N/A	N/A	N/A	N/A	N/A	N/A	N/A	N/A
	64-1	H2O			50		N/A	NO	NO	Cylindrical	25.4	63.5	N/A	N/A	N/A	-81	-80.5	-81.5		D	1500	1000	2000	N/A	No		N/A	N/A	N/A	N/A	67.5	A	N/A	A	T	3.50E-05	N/A	N/A	N/A	N/A	N/A	N/A	N/A	N/A	N/A	N/A	N/A	N/A	N/A
	64-2	H2O			125		N/A	NO	NO	Cylindrical	25.4	63.5	N/A	N/A	N/A	-80	-79.5	-80.5		D	1500	1000	2000	N/A	No		N/A	N/A	N/A	N/A	N/A	A	N/A	A	T	3.50E-05	N/A	N/A	N/A	N/A	N/A	N/A	N/A	N/A	N/A	N/A	N/A	N/A	N/A
	64-3	H2O			100		N/A	NO	NO	Cylindrical	25.4	63.5	N/A	N/A	N/A	-79	-78.5	-79.5		D	1500	1000	2000	N/A	No		N/A	N/A	N/A	N/A	N/A	A	N/A	A	T	3.50E-05	N/A	N/A	N/A	N/A	N/A	N/A	N/A	N/A	N/A	N/A	N/A	N/A	N/A
	64-4	H2O			24.8		N/A	NO	NO	Cylindrical	25.4	63.5	N/A	N/A	N/A	-78	-77.5	-78.5		D	1500	1000	2000	N/A	No		N/A	N/A	N/A	N/A	N/A	A	N/A	A	T	3.50E-05	N/A	N/A	N/A	N/A	N/A	N/A	N/A	N/A	N/A	N/A	N/A	N/A	N/A
	64-5	H2O			25		N/A	NO	NO	Cylindrical	25.4	63.5	N/A	N/A	N/A	-77	-76.5	-77.5		D	1500	1000	2000	N/A	No		N/A	N/A	N/A	N/A	N/A	A	N/A	A	T	3.50E-05	N/A	N/A	N/A	N/A	N/A	N/A	N/A	N/A	N/A	N/A	N/A	N/A	N/A
	64-6	H2O			50		N/A	NO	NO	Cylindrical	25.4	63.5	N/A	N/A	N/A	-78	-77.5	-78.5		D	1500	1000	2000	N/A	No		N/A	N/A	N/A	N/A	N/A	A	N/A	A	T	3.50E-05	N/A	N/A	N/A	N/A	N/A	N/A	N/A	N/A	N/A	N/A	N/A	N/A	N/A
	64-7	H2O			75		N/A	NO	NO	Cylindrical	25.4	63.5	N/A	N/A	N/A	-76	-75.5	-76.5		D	1500	1000	2000	N/A	No		N/A	N/A	N/A	N/A	N/A	A	N/A	A	T	3.50E-05	N/A	N/A	N/A	N/A	N/A	N/A	N/A	N/A	N/A	N/A	N/A	N/A	N/A
	64-8	H2O			100		N/A	NO	NO	Cylindrical	25.4	63.5	N/A	N/A	N/A	-77	-76.5	-77.5		D	1500	1000	2000	N/A	No		N/A	N/A	N/A	N/A	N/A	A	N/A	A	T	3.50E-05	N/A	N/A	N/A	N/A	N/A	N/A	N/A	N/A	N/A	N/A	N/A	N/A	N/A
	64-9	H2O			150		N/A	NO	NO	Cylindrical	25.4	63.5	N/A	N/A	N/A	-78	-77.5	-78.5		D	1500	1000	2000	N/A	No		N/A	N/A	N/A	N/A	N/A	A	N/A	A	T	3.50E-05	N/A	N/A	N/A	N/A	N/A	N/A	N/A	N/A	N/A	N/A	N/A	N/A	N/A
	64-10	H2O			175		N/A	NO	NO	Cylindrical	25.4	63.5	N/A	N/A	N/A	-78	-77.5	-78.5		D	1500	1000	2000	N/A	No		N/A	N/A	N/A	N/A	N/A	A	N/A	A	T	3.50E-05	N/A	N/A	N/A	N/A	N/A	N/A	N/A	N/A	N/A	N/A	N/A	N/A	N/A
	65-1	H2O			100		N/A	NO	NO	Cylindrical	25.4	63.5	N/A	N/A	N/A	-40	-39.5	-40.5		D	1500	1000	2000	N/A	No		N/A	N/A	N/A	N/A	27.3	A	N/A	A	T	3.50E-04	N/A	N/A	N/A	N/A	N/A	N/A	N/A	N/A	N/A	N/A	N/A	N/A	N/A
	65-2	H2O			100		N/A	NO	NO	Cylindrical	25.4	63.5	N/A	N/A	N/A	-40	-39.5	-40.5		D	1500	1000	2000	N/A	No		N/A	N/A	N/A	N/A	N/A	A	N/A	A	T	3.50E-04	N/A	N/A	N/A	N/A	N/A	N/A	N/A	N/A	N/A	N/A	N/A	N/A	N/A
	65-3	H2O			50.1		N/A	NO	NO	Cylindrical	25.4	63.5	N/A	N/A	N/A	-40	-39.5	-40.5		D	1500	1000	2000	N/A	No		N/A	N/A	N/A	N/A	N/A	A	N/A	A	T	3.50E-04	N/A	N/A	N/A	N/A	N/A	N/A	N/A	N/A	N/A	N/A	N/A	N/A	N/A
	65-4	H2O			25.1		N/A	NO	NO	Cylindrical	25.4	63.5	N/A	N/A	N/A	-40	-39.5	-40.5		D	1500	1000	2000	N/A	No		N/A	N/A	N/A	N/A	N/A	A	N/A	A	T	3.50E-04	N/A	N/A	N/A	N/A	N/A	N/A	N/A	N/A	N/A	N/A	N/A	N/A	N/A
	65-5	H2O			99.5		N/A	NO	NO	Cylindrical	25.4	63.5	N/A	N/A	N/A	-40	-39.5	-40.5		D	1500	1000	2000	N/A	No		N/A	N/A	N/A	N/A	N/A	A	N/A	A	T	3.50E-04	N/A	N/A	N/A	N/A	N/A	N/A	N/A	N/A	N/A	N/A	N/A	N/A	N/A
	65-6	H2O			50		N/A	NO	NO	Cylindrical	25.4	63.5	N/A	N/A	N/A	-40	-39.5	-40.5		D	1500	1000	2000	N/A	No		N/A	N/A	N/A	N/A	N/A	A	N/A	A	T	3.50E-04	N/A	N/A	N/A	N/A	N/A	N/A	N/A	N/A	N/A	N/A	N/A	N/A	N/A
	65-7	H2O			50		N/A	NO	NO	Cylindrical	25.4	63.5	N/A	N/A	N/A	-40	-39.5	-40.5		D	1500	1000	2000	N/A	No		N/A	N/A	N/A	N/A	N/A	A	N/A	A	T	3.50E-04	N/A	N/A	N/A	N/A	N/A	N/A	N/A	N/A	N/A	N/A	N/A	N/A	N/A
	66-1	H2O			10		N/A	NO	NO	Cylindrical	25.4	63.5	N/A	N/A	N/A	-41	-40.5	-41.5		D	1500	1000	2000	N/A	No		N/A	N/A	N/A	N/A	16.5	A	N/A	A	T	3.50E-05	N/A	N/A	N/A	N/A	N/A	N/A	N/A	N/A	N/A	N/A	N/A	N/A	N/A
	66-2	H2O			10		N/A	NO	NO	Cylindrical	25.4	63.5	N/A	N/A	N/A	-40	-39.5	-40.5		D	1500	1000	2000	N/A	No		N/A	N/A	N/A	N/A	N/A	A	N/A	A	T	3.50E-05	N/A	N/A	N/A	N/A	N/A	N/A	N/A	N/A	N/A	N/A	N/A	N/A	N/A
	66-3	H2O			50		N/A	NO	NO	Cylindrical	25.4	63.5	N/A	N/A	N/A	-41	-40.5	-41.5		D	1500	1000	2000	N/A	No		N/A	N/A	N/A	N/A	N/A	A	N/A	A	T	3.50E-05	N/A	N/A	N/A	N/A	N/A	N/A	N/A	N/A	N/A	N/A	N/A	N/A	N/A
	66-4	H2O			49.4		N/A	NO	NO	Cylindrical	25.4	63.5	N/A	N/A	N/A	-41	-40.5	-41.5		D	1500	1000	2000	N/A	No		N/A	N/A	N/A	N/A	N/A	A	N/A	A	T	3.50E-04	N/A	N/A	N/A	N/A	N/A	N/A	N/A	N/A	N/A	N/A	N/A	N/A	N/A
	67-1	H2O			50.4		N/A	YES	YES	Cylindrical	25.4	63.5	N/A	N/A	N/A	-30	-29.5	-30.5		D	1500	1000	2000	N/A	No		N/A	N/A	N/A	N/A	23.2	A	N/A	A	T	3.50E-04	N/A	N/A	N/A	N/A	N/A	N/A	N/A	N/A	N/A	N/A	N/A	N/A	N/A
	67-2	H2O			99.5		N/A	NO	YES	Cylindrical	25.4	63.5	N/A	N/A	N/A	-30	-29.5	-30.5		D	1500	1000	2000	N/A	No		N/A	N/A	N/A	N/A	N/A	A	N/A	A	T	3.50E-04	N/A	N/A	N/A	N/A	N/A	N/A	N/A	N/A	N/A	N/A	N/A	N/A	N/A
	67-3	H2O			50		N/A	NO	YES	Cylindrical	25.4	63.5	N/A	N/A	N/A	-29	-28.5	-29.5		D	1500	1000	2000	N/A	No		N/A	N/A	N/A	N/A	N/A	A	N/A	A	T	3.50E-06	N/A	N/A	N/A	N/A	N/A	N/A	N/A	N/A	N/A	N/A	N/A	N/A	N/A
	67-4	H2O			50.5		N/A	NO	YES	Cylindrical	25.4	63.5	N/A	N/A	N/A	-29	-28.5	-29.5		D	1500	1000	2000	N/A	No		N/A	N/A	N/A	N/A	N/A	A	N/A	A	T	3.50E-04	N/A	N/A	N/A	N/A	N/A	N/A	N/A	N/A	N/A	N/A	N/A	N/A	N/A
	67-5	H2O			50		N/A	NO	YES	Cylindrical	25.4	63.5	N/A	N/A	N/A	-29	-28.5	-29.5		D	1500	1000	2000	N/A	No		N/A	N/A	N/A	N/A	N/A	A	N/A	A	T	3.50E-05	N/A	N/A	N/A	N/A	N/A	N/A	N/A	N/A	N/A	N/A	N/A	N/A	N/A
	67-6	H2O			50		N/A	NO	YES	Cylindrical	25.4	63.5	N/A	N/A	N/A	-29	-28.5	-29.5		D	1500	1000	2000	N/A	No		N/A	N/A	N/A	N/A	N/A	A	N/A	A	T	3.50E-05	N/A	N/A	N/A	N/A	N/A	N/A	N/A	N/A	N/A	N/A	N/A	N/A	N/A
	68-1	H2O			100		N/A	NO	NO	Cylindrical	25.4	63.5	N/A	N/A	N/A	-49	-48.5	-49.5		D	1500	1000	2000	N/A	No		N/A	N/A	N/A	N/A	35.4	A	N/A	A	T	3.50E-04	N/A	N/A	N/A	N/A	N/A	N/A	N/A	N/A	N/A	N/A	N/A	N/A	N/A
	68-2	H2O			99.8		N/A	NO	NO	Cylindrical	25.4	63.5	N/A	N/A	N/A	-50	-49.5	-50.5		D	1500	1000	2000	N/A	No		N/A	N/A	N/A	N/A	N/A	A	N/A	A	T	3.50E-04	N/A	N/A	N/A	N/A	N/A	N/A	N/A	N/A	N/A	N/A	N/A	N/A	N/A
	68-3	H2O			50.1		N/A	NO	NO	Cylindrical	25.4	63.5	N/A	N/A	N/A	-50	-49.5	-50.5		D	1500	1000	2000	N/A	No		N/A	N/A	N/A	N/A	N/A	A	N/A	A	T	3.50E-04	N/A	N/A	N/A	N/A	N/A	N/A	N/A	N/A	N/A	N/A	N/A	N/A	N/A
	69-1	H2O			49.7		N/A	NO	NO	Cylindrical	25.4	63.5	N/A	N/A	N/A	-61	-60.5	-61.5		D	1500	1000	2000	N/A	No		N/A	N/A	N/A	N/A	59.9	A	N/A	A	T	3.50E-04	N/A	N/A	N/A	N/A	N/A	N/A	N/A	N/A	N/A	N/A	N/A	N/A	N/A
	69-2	H2O			49.5		N/A	NO	NO	Cylindrical	25.4	63.5	N/A	N/A	N/A	-61	-60.5	-61.5		D	1500	1000	2000	N/A	No		N/A	N/A	N/A	N/A	N/A	A	N/A	A	T	3.50E-05	N/A	N/A	N/A	N/A	N/A	N/A	N/A	N/A	N/A	N/A	N/A	N/A	N/A
	69-3	H2O			50.4		N/A	NO	NO	Cylindrical	25.4	63.5	N/A	N/A	N/A	-61	-60.5	-61.5		D	1500	1000	2000	N/A	No		N/A	N/A	N/A	N/A	N/A	A	N/A	A	T	3.50E-06	N/A	N/A	N/A	N/A	N/A	N/A	N/A	N/A	N/A	N/A	N/A	N/A	N/A
	69-4	H2O			50.5		N/A	NO	NO	Cylindrical	25.4	63.5	N/A	N/A	N/A	-60	-59.5	-60.5		D	1500	1000	2000	N/A	No		N/A	N/A	N/A	N/A	N/A	A	N/A	A	T	3.50E-04	N/A	N/A	N/A	N/A	N/A	N/A	N/A	N/A	N/A	N/A	N/A	N/A	N/A
	69-5	H2O			50.4		N/A	NO	NO	Cylindrical	25.4	63.5	N/A	N/A	N/A	-60	-59.5	-60.5		D	1500	1000	2000	N/A	No		N/A	N/A	N/A	N/A	N/A	A	N/A	A	T	3.50E-04	N/A	N/A	N/A	N/A	N/A	N/A	N/A	N/A	N/A	N/A	N/A	N/A	N/A
	69-6	H2O			51		N/A	NO	NO	Cylindrical	25.4	63.5	N/A	N/A	N/A	-60	-59.5	-60.5		D	1500	1000	2000	N/A	No		N/A	N/A	N/A	N/A	N/A	A	N/A	A	T	3.50E-05	N/A	N/A	N/A	N/A	N/A	N/A	N/A	N/A	N/A	N/A	N/A	N/A	N/A
	69-7	H2O			51		N/A	NO	NO	Cylindrical	25.4	63.5	N/A	N/A	N/A	-60	-59.5	-60.5		D	1500	1000	2000	N/A	No		N/A	N/A	N/A	N/A	N/A	A	N/A	A	T	3.50E-04	N/A	N/A	N/A	N/A	N/A	N/A	N/A	N/A	N/A	N/A	N/A	N/A	N/A
	70-1	H2O			49.6		N/A	YES	YES	Cylindrical	25.4	63.5	N/A	N/A	N/A	-15	-14.5	-15.5		D	1500	1000	2000	N/A	No		N/A	N/A	N/A	N/A	14.4	A	N/A	A	T	3.50E-04	N/A	N/A	N/A	N/A	N/A	N/A	N/A	N/A	N/A	N/A	N/A	N/A	N/A
	70-2	H2O			49.6		N/A	NO	YES	Cylindrical	25.4	63.5	N/A	N/A	N/A	-15	-14.5	-15.5		D	1500	1000	2000	N/A	No		N/A	N/A	N/A	N/A	N/A	A	N/A	A	T	3.50E-04	N/A	N/A	N/A	N/A	N/A	N/A	N/A	N/A	N/A	N/A	N/A	N/A	N/A
	70-3	H2O			50.2		N/A	NO	YES	Cylindrical	25.4	63.5	N/A	N/A	N/A	-15	-14.5	-15.5		D	1500	1000	2000	N/A	No		N/A	N/A	N/A	N/A	N/A	A	N/A	A	T	3.50E-05	N/A	N/A	N/A	N/A	N/A	N/A	N/A	N/A	N/A	N/A	N/A	N/A	N/A
	70-4	H2O			50.1		N/A	NO	YES	Cylindrical	25.4	63.5	N/A	N/A	N/A	-15	-14.5	-15.5		D	1500	1000	2000	N/A	No		N/A	N/A	N/A	N/A	N/A	A	N/A	A	T	3.50E-04	N/A	N/A	N/A	N/A	N/A	N/A	N/A	N/A	N/A	N/A	N/A	N/A	N/A
	70-5	H2O			50		N/A	NO	YES	Cylindrical	25.4	63.5	N/A	N/A	N/A	-15	-14.5	-15.5		D	1500	1000	2000	N/A	No		N/A	N/A	N/A	N/A	N/A	A	N/A	A	T	3.50E-04	N/A	N/A	N/A	N/A	N/A	N/A	N/A	N/A	N/A	N/A	N/A	N/A	N/A
Jacka (1984a)	N/A	H2O	Constant stress	Uniaxial compression	0	Full creep curves 9Fig. 2). Summary data in a table (Table 2).	N/A	NO	NO	Cylindrical	25.4±0.2	63.2±4	N/A	N/A	N/A	-5	-4.7	-5.3	Table 1	D	1700	1500	1900	Lineat intercept method.	N/A	Page 261	N/A	N/A	O	E	0.05	O	Stress maintained constant by adding load over time?	O	E	N/A	N/A	N/A	N/A	N/A	N/A	N/A	N/A	N/A	N/A	N/A	N/A	N/A	N/A
	N/A	H2O			0		N/A	NO	NO	Cylindrical	25.4±0.2	63.2±4	N/A	N/A	N/A	-5	-4.7	-5.3		D	1700	1500	1900		N/A		N/A	N/A	O	E	0.07	O		O	E	N/A	N/A	N/A	N/A	N/A	N/A	N/A	N/A	N/A	N/A	N/A	N/A	N/A	N/A
	N/A	H2O			0		N/A	YES	NO	Cylindrical	25.4±0.2	63.2±4	N/A	N/A	N/A	-5	-4.7	-5.3		D	1700	1500	1900		N/A		N/A	0.009	O	E	0.1	O		O	E	9.30E-10	N/A	N/A	N/A	N/A	N/A	N/A	N/A	N/A	N/A	N/A	N/A	N/A	N/A
	N/A	H2O			0		N/A	YES	NO	Cylindrical	25.4±0.2	63.2±4	N/A	N/A	N/A	-5	-4.7	-5.3		D	1700	1500	1900		N/A		N/A	0.0075	O	E	0.13	O		O	E	2.00E-09	N/A	N/A	N/A	N/A	N/A	N/A	N/A	N/A	N/A	N/A	N/A	N/A	N/A
	N/A	H2O			0		N/A	YES	NO	Cylindrical	25.4±0.2	63.2±4	N/A	N/A	N/A	-5	-4.7	-5.3		D	1700	1500	1900		N/A		N/A	0.0055	O	E	0.2	O		O	E	8.70E-09	N/A	N/A	N/A	N/A	N/A	N/A	N/A	N/A	N/A	N/A	N/A	N/A	N/A
	N/A	H2O			0		N/A	YES	NO	Cylindrical	25.4±0.2	63.2±4	N/A	N/A	N/A	-5	-4.7	-5.3		D	1700	1500	1900		N/A		N/A	0.0048	O	E	0.3	O		O	E	3.90E-08	N/A	N/A	N/A	N/A	N/A	N/A	N/A	N/A	N/A	N/A	N/A	N/A	N/A
	N/A	H2O			0		N/A	YES	NO	Cylindrical	25.4±0.2	63.2±4	N/A	N/A	N/A	-5	-4.7	-5.3		D	1700	1500	1900		N/A		N/A	0.0049	O	E	0.6	O		O	E	1.90E-07	N/A	N/A	N/A	N/A	N/A	N/A	N/A	N/A	N/A	N/A	N/A	N/A	N/A
	N/A	H2O			0		N/A	YES	NO	Cylindrical	25.4±0.2	63.2±4	N/A	N/A	N/A	-5	-4.7	-5.3		D	1700	1500	1900		N/A		N/A	0.004	O	E	0.8	O		O	E	7.00E-07	N/A	N/A	N/A	N/A	N/A	N/A	N/A	N/A	N/A	N/A	N/A	N/A	N/A
	N/A	H2O			0		N/A	NO	NO	Cylindrical	25.4±0.2	63.2±4	N/A	N/A	N/A	-10.6	-10.4	-11		D	1700	1500	1900		N/A		N/A	N/A	O	E	0.05	O		O	E	N/A	N/A	N/A	N/A	N/A	N/A	N/A	N/A	N/A	N/A	N/A	N/A	N/A	N/A
	N/A	H2O			0		N/A	NO	NO	Cylindrical	25.4±0.2	63.2±4	N/A	N/A	N/A	-10.6	-10.4	-11		D	1700	1500	1900		N/A		N/A	N/A	O	E	0.1	O		O	E	N/A	N/A	N/A	N/A	N/A	N/A	N/A	N/A	N/A	N/A	N/A	N/A	N/A	N/A
	N/A	H2O			0		N/A	YES	NO	Cylindrical	25.4±0.2	63.2±4	N/A	N/A	N/A	-10.6	-10.4	-11		D	1700	1500	1900		N/A		N/A	0.0062	O	E	0.2	O		O	E	3.50E-09	N/A	N/A	N/A	N/A	N/A	N/A	N/A	N/A	N/A	N/A	N/A	N/A	N/A
	N/A	H2O			0		N/A	YES	NO	Cylindrical	25.4±0.2	63.2±4	N/A	N/A	N/A	-10.6	-10.4	-11		D	1700	1500	1900		N/A		N/A	0.0058	O	E	0.3	O		O	E	1.20E-08	N/A	N/A	N/A	N/A	N/A	N/A	N/A	N/A	N/A	N/A	N/A	N/A	N/A
	N/A	H2O			0		N/A	YES	NO	Cylindrical	25.4±0.2	63.2±4	N/A	N/A	N/A	-10.6	-10.4	-11		D	1700	1500	1900		N/A		N/A	0.0067	O	E	0.4	O		O	E	2.90E-08	N/A	N/A	N/A	N/A	N/A	N/A	N/A	N/A	N/A	N/A	N/A	N/A	N/A
	N/A	H2O			0		N/A	YES	NO	Cylindrical	25.4±0.2	63.2±4	N/A	N/A	N/A	-10.6	-10.4	-11		D	1700	1500	1900		N/A		N/A	0.0063	O	E	0.6	O		O	E	1.00E-07	N/A	N/A	N/A	N/A	N/A	N/A	N/A	N/A	N/A	N/A	N/A	N/A	N/A
	N/A	H2O			0		N/A	YES	NO	Cylindrical	25.4±0.2	63.2±4	N/A	N/A	N/A	-10.6	-10.4	-11		D	1700	1500	1900		N/A		N/A	0.0066	O	E	0.8	O		O	E	2.60E-07	N/A	N/A	N/A	N/A	N/A	N/A	N/A	N/A	N/A	N/A	N/A	N/A	N/A
	N/A	H2O			0		N/A	YES	NO	Cylindrical	25.4±0.2	63.2±4	N/A	N/A	N/A	-10.6	-10.4	-11		D	1700	1500	1900		N/A		N/A	0.0075	O	E	1	O		O	E	4.00E-07	N/A	N/A	N/A	N/A	N/A	N/A	N/A	N/A	N/A	N/A	N/A	N/A	N/A
	N/A	H2O			0		N/A	YES	NO	Cylindrical	25.4±0.2	63.2±4	N/A	N/A	N/A	-17.8	-16.8	-18.8		D	1700	1500	1900		N/A		N/A	0.0055	O	E	0.13	O		O	E	3.30E-10	N/A	N/A	N/A	N/A	N/A	N/A	N/A	N/A	N/A	N/A	N/A	N/A	N/A
	N/A	H2O			0		N/A	YES	NO	Cylindrical	25.4±0.2	63.2±4	N/A	N/A	N/A	-17.8	-16.8	-18.8		D	1700	1500	1900		N/A		N/A	0.0062	O	E	0.3	O		O	E	3.30E-09	N/A	N/A	N/A	N/A	N/A	N/A	N/A	N/A	N/A	N/A	N/A	N/A	N/A
	N/A	H2O			0		N/A	YES	NO	Cylindrical	25.4±0.2	63.2±4	N/A	N/A	N/A	-17.8	-16.8	-18.8		D	1700	1500	1900		N/A		N/A	0.006	O	E	0.4	O		O	E	7.20E-09	N/A	N/A	N/A	N/A	N/A	N/A	N/A	N/A	N/A	N/A	N/A	N/A	N/A
	N/A	H2O			0		N/A	YES	NO	Cylindrical	25.4±0.2	63.2±4	N/A	N/A	N/A	-17.8	-16.8	-18.8		D	1700	1500	1900		N/A		N/A	0.008	O	E	0.6	O		O	E	2.60E-08	N/A	N/A	N/A	N/A	N/A	N/A	N/A	N/A	N/A	N/A	N/A	N/A	N/A
	N/A	H2O			0		N/A	YES	NO	Cylindrical	25.4±0.2	63.2±4	N/A	N/A	N/A	-17.8	-16.8	-18.8		D	1700	1500	1900		N/A		N/A	0.0068	O	E	0.8	O		O	E	5.80E-08	N/A	N/A	N/A	N/A	N/A	N/A	N/A	N/A	N/A	N/A	N/A	N/A	N/A
	N/A	H2O			0		N/A	YES	NO	Cylindrical	25.4±0.2	63.2±4	N/A	N/A	N/A	-17.8	-16.8	-18.8		D	1700	1500	1900		N/A		N/A	0.0076	O	E	1.2	O		O	E	2.10E-07	N/A	N/A	N/A	N/A	N/A	N/A	N/A	N/A	N/A	N/A	N/A	N/A	N/A
	N/A	H2O			0		N/A	YES	NO	Cylindrical	25.4±0.2	63.2±4	N/A	N/A	N/A	-32.5	-30.9	-33.9		D	1700	1500	1900		N/A		N/A	0.0058	O	E	0.07	O		O	E	5.00E-11	N/A	N/A	N/A	N/A	N/A	N/A	N/A	N/A	N/A	N/A	N/A	N/A	N/A
	N/A	H2O			0		N/A	YES	NO	Cylindrical	25.4±0.2	63.2±4	N/A	N/A	N/A	-32.5	-30.9	-33.9		D	1700	1500	1900		N/A		N/A	0.006	O	E	0.1	O		O	E	1.10E-10	N/A	N/A	N/A	N/A	N/A	N/A	N/A	N/A	N/A	N/A	N/A	N/A	N/A
	N/A	H2O			0		N/A	YES	NO	Cylindrical	25.4±0.2	63.2±4	N/A	N/A	N/A	-32.5	-30.9	-33.9		D	1700	1500	1900		N/A		N/A	0.006	O	E	0.13	O		O	E	1.50E-10	N/A	N/A	N/A	N/A	N/A	N/A	N/A	N/A	N/A	N/A	N/A	N/A	N/A
	N/A	H2O			0		N/A	YES	NO	Cylindrical	25.4±0.2	63.2±4	N/A	N/A	N/A	-32.5	-30.9	-33.9		D	1700	1500	1900		N/A		N/A	0.0071	O	E	0.2	O		O	E	3.20E-10	N/A	N/A	N/A	N/A	N/A	N/A	N/A	N/A	N/A	N/A	N/A	N/A	N/A
	N/A	H2O			0		N/A	YES	NO	Cylindrical	25.4±0.2	63.2±4	N/A	N/A	N/A	-32.5	-30.9	-33.9		D	1700	1500	1900		N/A		N/A	0.0059	O	E	0.36	O		O	E	1.30E-09	N/A	N/A	N/A	N/A	N/A	N/A	N/A	N/A	N/A	N/A	N/A	N/A	N/A
	N/A	H2O			0		N/A	YES	NO	Cylindrical	25.4±0.2	63.2±4	N/A	N/A	N/A	-32.5	-30.9	-33.9		D	1700	1500	1900		N/A		N/A	0.0051	O	E	0.5	O		O	E	3.30E-09	N/A	N/A	N/A	N/A	N/A	N/A	N/A	N/A	N/A	N/A	N/A	N/A	N/A
	N/A	H2O			0		N/A	YES	NO	Cylindrical	25.4±0.2	63.2±4	N/A	N/A	N/A	-32.5	-30.9	-33.9		D	1700	1500	1900		N/A		N/A	0.005	O	E	0.6	O		O	E	5.50E-09	N/A	N/A	N/A	N/A	N/A	N/A	N/A	N/A	N/A	N/A	N/A	N/A	N/A
	N/A	H2O			0		N/A	YES	NO	Cylindrical	25.4±0.2	63.2±4	N/A	N/A	N/A	-32.5	-30.9	-33.9		D	1700	1500	1900		N/A		N/A	0.007	O	E	0.8	O		O	E	1.00E-08	N/A	N/A	N/A	N/A	N/A	N/A	N/A	N/A	N/A	N/A	N/A	N/A	N/A
	N/A	H2O			0		N/A	YES	NO	Cylindrical	25.4±0.2	63.2±4	N/A	N/A	N/A	-32.5	-30.9	-33.9		D	1700	1500	1900		N/A		N/A	0.0078	O	E	1	O		O	E	2.10E-08	N/A	N/A	N/A	N/A	N/A	N/A	N/A	N/A	N/A	N/A	N/A	N/A	N/A
Jacka (1984b)	N/A	H2O	Constant load	Uniaxial compression	0	Full creep curves (Fig. 3). Summary data in a table (Table 2).	N/A	YES	YES	Cylindrical	25.4	73.2	N/A	N/A	N/A	-7	-6.9	-7.1	Short time (10s) of 0.01K. Long time <0.1K. (Morgan, 1979; Jacka, 1984b)	D	4500	N/A	N/A	Lineat intercept method.	N/A	Crossed polaroids?	N/A	0.012	O	E	0.3	O	N/A	O	E	3.40E-08	N/A	N/A	N/A	N/A	N/A	N/A	N/A	N/A	N/A	N/A	N/A	N/A	N/A
	N/A	H2O			0		N/A	YES	YES	Cylindrical	25.4	72	N/A	N/A	N/A	-7	-6.9	-7.1		D	4000	N/A	N/A		N/A		N/A	0.008	O	E	0.3	O	N/A	O	E	3.20E-08	N/A	N/A	N/A	N/A	N/A	N/A	N/A	N/A	N/A	N/A	N/A	N/A	N/A
	N/A	H2O			0		N/A	YES	YES	Cylindrical	25.4	72	N/A	N/A	N/A	-7	-6.9	-7.1		D	2500	N/A	N/A		N/A		N/A	0.008	O	E	0.3	O	N/A	O	E	5.00E-08	N/A	N/A	N/A	N/A	N/A	N/A	N/A	N/A	N/A	N/A	N/A	N/A	N/A
	N/A	H2O			0		N/A	YES	YES	Cylindrical	25.4	71.5	N/A	N/A	N/A	-7	-6.9	-7.1		D	2200	N/A	N/A		N/A		N/A	0.01	O	E	0.3	O	N/A	O	E	3.20E-08	N/A	N/A	N/A	N/A	N/A	N/A	N/A	N/A	N/A	N/A	N/A	N/A	N/A
	N/A	H2O			0		N/A	YES	YES	Cylindrical	25.4	72	N/A	N/A	N/A	-7	-6.9	-7.1		D	1500	N/A	N/A		N/A		N/A	0.009	O	E	0.3	O	N/A	O	E	2.50E-08	N/A	N/A	N/A	N/A	N/A	N/A	N/A	N/A	N/A	N/A	N/A	N/A	N/A
	N/A	H2O			0		N/A	YES	NO	Cylindrical	25.4	63	N/A	N/A	N/A	-10	-9.9	-10.1		D	4500	N/A	N/A		N/A		N/A	0.008	O	E	0.26	O	N/A	O	E	1.20E-08	N/A	N/A	N/A	N/A	N/A	N/A	N/A	N/A	N/A	N/A	N/A	N/A	N/A
	N/A	H2O			0		N/A	YES	YES	Cylindrical	25.4	76	N/A	N/A	N/A	-10	-9.9	-10.1		D	4500	N/A	N/A		N/A		N/A	0.008	O	E	0.26	O	N/A	O	E	1.10E-08	N/A	N/A	N/A	N/A	N/A	N/A	N/A	N/A	N/A	N/A	N/A	N/A	N/A
	N/A	H2O			0		N/A	YES	YES	Cylindrical	25.4	77	N/A	N/A	N/A	-10	-9.9	-10.1		D	4000	N/A	N/A		N/A		N/A	0.018	O	E	0.26	O	N/A	O	E	1.20E-08	N/A	N/A	N/A	N/A	N/A	N/A	N/A	N/A	N/A	N/A	N/A	N/A	N/A
	N/A	H2O			0		N/A	YES	NO	Cylindrical	25.4	76	N/A	N/A	N/A	-10	-9.9	-10.1		D	2500	N/A	N/A		N/A		N/A	0.02	O	E	0.26	O	N/A	O	E	1.10E-08	N/A	N/A	N/A	N/A	N/A	N/A	N/A	N/A	N/A	N/A	N/A	N/A	N/A
	N/A	H2O			0		N/A	YES	YES	Cylindrical	25.4	75	N/A	N/A	N/A	-10	-9.9	-10.1		D	2200	N/A	N/A		N/A		N/A	0.02	O	E	0.26	O	N/A	O	E	1.00E-08	N/A	N/A	N/A	N/A	N/A	N/A	N/A	N/A	N/A	N/A	N/A	N/A	N/A
	N/A	H2O			0		N/A	YES	YES	Cylindrical	25.4	74	N/A	N/A	N/A	-10	-9.9	-10.1		D	1500	N/A	N/A		N/A		N/A	0.02	O	E	0.26	O	N/A	O	E	9.30E-09	N/A	N/A	N/A	N/A	N/A	N/A	N/A	N/A	N/A	N/A	N/A	N/A	N/A
	N/A	H2O			0		N/A	YES	YES	Cylindrical	25.4	80.2	N/A	N/A	N/A	-9	-8.9	-9.1		D	4500	N/A	N/A		N/A		N/A	0.011	O	E	0.5	O	N/A	O	E	1.30E-07	N/A	N/A	N/A	N/A	N/A	N/A	N/A	N/A	N/A	N/A	N/A	N/A	N/A
	N/A	H2O			0		N/A	YES	YES	Cylindrical	25.4	80.8	N/A	N/A	N/A	-9	-8.9	-9.1		D	2500	N/A	N/A		N/A		N/A	0.011	O	E	0.5	O	N/A	O	E	9.00E-08	N/A	N/A	N/A	N/A	N/A	N/A	N/A	N/A	N/A	N/A	N/A	N/A	N/A
	N/A	H2O			0		N/A	YES	YES	Cylindrical	25.4	81.2	N/A	N/A	N/A	-9	-8.9	-9.1		D	2200	N/A	N/A		N/A		N/A	0.008	O	E	0.5	O	N/A	O	E	8.10E-08	N/A	N/A	N/A	N/A	N/A	N/A	N/A	N/A	N/A	N/A	N/A	N/A	N/A
	N/A	H2O			0		N/A	YES	YES	Cylindrical	25.4	67.3	N/A	N/A	N/A	-9	-8.9	-9.1		D	1500	N/A	N/A		N/A		N/A	0.007	O	E	0.5	O	N/A	O	E	1.30E-07	N/A	N/A	N/A	N/A	N/A	N/A	N/A	N/A	N/A	N/A	N/A	N/A	N/A
Jacka & Maccagnan (1984)	A1	H2O	Constant stress	Uniaxial compression	0	Mean creep curve, i.e., an envelope of creep curve that summarises A1-A7 (Fig. 2). Summary data in figures (Fig. 3).	N/A	YES	NO	Cylindrical	25.4	60	N/A	N/A	N/A	-3	-2.9	-3.1	Short time (10s) of 0.01K. Long time <0.1K. (Morgan, 1979; Jacka, 1984b)	D	2200	N/A	N/A	Mean linear intercept	N/A	Crossed polaroids	N/A	0.008	O	E	0.2	O	N/A	O	E	2.00E-08	1.52E-08	3.23E-08	N/A	N/A	N/A	N/A	N/A	N/A	N/A	N/A	0.275913	Fan et al. (2021a)	N/A
	A2	H2O			0		N/A	NO	NO	Cylindrical	25.4	60	N/A	N/A	N/A	-3	-2.9	-3.1		D	2200	N/A	N/A		N/A		N/A	0.008	O	E	0.2	O	N/A	O	E	2.00E-08	1.52E-08	3.23E-08	N/A	N/A	N/A	N/A	N/A	N/A	N/A	N/A	N/A	N/A	N/A
	A3	H2O			0		N/A	NO	NO	Cylindrical	25.4	60	N/A	N/A	N/A	-3	-2.9	-3.1		D	2200	N/A	N/A		N/A		N/A	0.008	O	E	0.2	O	N/A	O	E	2.00E-08	1.52E-08	3.23E-08	N/A	N/A	N/A	N/A	N/A	N/A	N/A	N/A	N/A	N/A	N/A
	A4	H2O			0		N/A	NO	NO	Cylindrical	25.4	60	N/A	N/A	N/A	-3	-2.9	-3.1		D	2200	N/A	N/A		N/A		N/A	0.008	O	E	0.2	O	N/A	O	E	2.00E-08	1.52E-08	3.23E-08	N/A	N/A	N/A	N/A	N/A	N/A	N/A	N/A	N/A	N/A	N/A
	A5	H2O			0		N/A	NO	NO	Cylindrical	25.4	60	N/A	N/A	N/A	-3	-2.9	-3.1		D	2200	N/A	N/A		N/A		N/A	0.008	O	E	0.2	O	N/A	O	E	2.00E-08	1.52E-08	3.23E-08	N/A	N/A	N/A	N/A	N/A	N/A	N/A	N/A	N/A	N/A	N/A
	A6	H2O			0		N/A	NO	NO	Cylindrical	25.4	60	N/A	N/A	N/A	-3	-2.9	-3.1		D	2200	N/A	N/A		N/A		N/A	0.008	O	E	0.2	O	N/A	O	E	2.00E-08	1.52E-08	3.23E-08	N/A	N/A	N/A	N/A	N/A	N/A	N/A	N/A	N/A	N/A	N/A
	A7	H2O			0		N/A	NO	YES	Cylindrical	25.4	60	N/A	N/A	N/A	-3	-2.9	-3.1		D	2200	N/A	N/A		N/A		N/A	0.008	O	E	0.2	O	N/A	O	E	2.00E-08	1.52E-08	3.23E-08	N/A	N/A	N/A	N/A	N/A	N/A	N/A	N/A	N/A	N/A	N/A
	N/A	H2O		Extension	0	Creep curve (Fig. 7)	N/A	YES	NO	Cylindrical	25.4	60	N/A	N/A	N/A	-3	-2.9	-3.1		D	2200	N/A	N/A		N/A		N/A	0.012	O	E	0.2	O	N/A	O	E	1.94E-08	N/A	N/A	N/A	N/A	N/A	N/A	N/A	N/A	N/A	N/A	N/A	N/A	N/A
Gao & Jacka (1987)	L	H2O	Constant stress	uniaxial compression	0	Full creep curves.	N/A	YES	YES	Cylindrical	25.4	65	N/A	N/A	N/A	-3.3	-3.2	-3.4	Short time (10s) of 0.01K. Long time <0.1K. (Morgan, 1979; Jacka, 1984b)	D	700	N/A	N/A	Mean grain size calculated from total grain area and number of grains.	N/A	CPO: Rigsby stage?	N/A	0.007	O	E	0.2	O	Stress maintained constant by adding load over time?	O	E	1.58E-08	N/A	N/A	Creep curved digitized from Fig. 2.	N/A	N/A	N/A	N/A	N/A	N/A	N/A	N/A	N/A	N/A
Jacka (1994)	N/A	H2O	Constant stress	Uniaxial compression	0	No creep curve, Summary data in a table (Table 1). No detailed strain data.	N/A	YES	NO	Cylindrical	25.6	39.3 to 58.7	N/A	N/A	N/A	-3.3	-3.2	-3.4	Short time (10s) of 0.01K. Long time <0.1K. (Morgan, 1979; Jacka, 1984b)	D	1700	1500	1900	Number of grain per unit area (page 151)	N/A	Jacka & Lile (1984) (page 147)	N/A	0.0071	O	E	0.2	O	N/A	O	E	1.10E-08	N/A	N/A	N/A	N/A	N/A	N/A	N/A	N/A	N/A	N/A	N/A	N/A	N/A
	N/A	H20			0		N/A	YES	NO	Cylindrical	25.6	39.3 to 58.7	N/A	N/A	N/A	-3.3	-3.2	-3.4		D	1700	1500	1900		N/A		N/A	0.0072	O	E	0.2	O	N/A	O	E	1.40E-08	N/A	N/A	N/A	N/A	N/A	N/A	N/A	N/A	N/A	N/A	N/A	N/A	N/A
	N/A	H2O			0		N/A	YES	NO	Cylindrical	25.6	39.3 to 58.7	N/A	N/A	N/A	-3.3	-3.2	-3.4		D	1700	1500	1900		N/A		N/A	0.0093	O	E	0.2	O	N/A	O	E	2.00E-08	N/A	N/A	N/A	N/A	N/A	N/A	N/A	N/A	N/A	N/A	N/A	N/A	N/A
	N/A	H2O			0		N/A	YES	NO	Cylindrical	25.6	39.3 to 58.7	N/A	N/A	N/A	-3.3	-3.2	-3.4		D	1700	1500	1900		N/A		N/A	0.0068	O	E	0.2	O	N/A	O	E	1.10E-08	N/A	N/A	N/A	N/A	N/A	N/A	N/A	N/A	N/A	N/A	N/A	N/A	N/A
	N/A	H2O			0	No creep curve, Summary data in a table (Table 2). No detailed strain data.	N/A	YES	NO	Cylindrical	64.9	68.1	N/A	N/A	N/A	-5	-4.9	-5.1		D	1400	N/A	N/A		N/A	Page 151	N/A	N/A	O	E	0.25	O	N/A	O	E	1.45E-08	N/A	N/A	N/A	N/A	N/A	N/A	N/A	N/A	N/A	N/A	N/A	N/A	N/A
	N/A	H2O			0		N/A	YES	NO	Cylindrical	53.3	66	N/A	N/A	N/A	-5	-4.9	-5.1		D	1400	N/A	N/A		N/A		N/A	N/A	O	E	0.25	O	N/A	O	E	1.55E-08	N/A	N/A	N/A	N/A	N/A	N/A	N/A	N/A	N/A	N/A	N/A	N/A	N/A
	N/A	H2O			0		N/A	YES	NO	Cylindrical	40.8	62	N/A	N/A	N/A	-5	-4.9	-5.1		D	1400	N/A	N/A		N/A		N/A	N/A	O	E	0.25	O	N/A	O	E	1.70E-08	N/A	N/A	N/A	N/A	N/A	N/A	N/A	N/A	N/A	N/A	N/A	N/A	N/A
	N/A	H2O			0		N/A	YES	NO	Cylindrical	25.4	64.1	N/A	N/A	N/A	-5	-4.9	-5.1		D	1400	N/A	N/A		N/A		N/A	N/A	O	E	0.25	O	N/A	O	E	2.95E-08	N/A	N/A	N/A	N/A	N/A	N/A	N/A	N/A	N/A	N/A	N/A	N/A	N/A
	N/A	H2O			0		N/A	YES	NO	Cylindrical	17	70	N/A	N/A	N/A	-5	-4.9	-5.1		D	1400	N/A	N/A		N/A		N/A	N/A	O	E	0.25	O	N/A	O	E	3.40E-08	N/A	N/A	N/A	N/A	N/A	N/A	N/A	N/A	N/A	N/A	N/A	N/A	N/A
	N/A	H2O			0		N/A	YES	NO	Cylindrical	64.6	67.7	N/A	N/A	N/A	-5	-4.9	-5.1		D	2900	N/A	N/A		N/A		N/A	N/A	O	E	0.25	O	N/A	O	E	1.30E-08	N/A	N/A	N/A	N/A	N/A	N/A	N/A	N/A	N/A	N/A	N/A	N/A	N/A
	N/A	H2O			0		N/A	YES	NO	Cylindrical	52.5	66.3	N/A	N/A	N/A	-5	-4.9	-5.1		D	2900	N/A	N/A		N/A		N/A	N/A	O	E	0.25	O	N/A	O	E	1.50E-08	N/A	N/A	N/A	N/A	N/A	N/A	N/A	N/A	N/A	N/A	N/A	N/A	N/A
	N/A	H2O			0		N/A	YES	NO	Cylindrical	41.1	67.6	N/A	N/A	N/A	-5	-4.9	-5.1		D	2900	N/A	N/A		N/A		N/A	N/A	O	E	0.25	O	N/A	O	E	1.40E-08	N/A	N/A	N/A	N/A	N/A	N/A	N/A	N/A	N/A	N/A	N/A	N/A	N/A
	N/A	H2O			0		N/A	YES	NO	Cylindrical	24.8	60.4	N/A	N/A	N/A	-5	-4.9	-5.1		D	2900	N/A	N/A		N/A		N/A	N/A	O	E	0.25	O	N/A	O	E	3.30E-08	N/A	N/A	N/A	N/A	N/A	N/A	N/A	N/A	N/A	N/A	N/A	N/A	N/A
	N/A	H2O			0		N/A	YES	NO	Cylindrical	16.2	62.3	N/A	N/A	N/A	-5	-4.9	-5.1		D	2900	N/A	N/A		N/A		N/A	N/A	O	E	0.25	O	N/A	O	E	4.15E-08	N/A	N/A	N/A	N/A	N/A	N/A	N/A	N/A	N/A	N/A	N/A	N/A	N/A
	N/A	H2O			0		N/A	YES	NO	Cylindrical	53.2	65.8	N/A	N/A	N/A	-5	-4.9	-5.1		D	1400	N/A	N/A		N/A		N/A	N/A	O	E	0.25	O	N/A	O	E	1.70E-08	N/A	N/A	N/A	N/A	N/A	N/A	N/A	N/A	N/A	N/A	N/A	N/A	N/A
	N/A	H2O			0		N/A	YES	NO	Cylindrical	41.3	65.4	N/A	N/A	N/A	-5	-4.9	-5.1		D	1400	N/A	N/A		N/A		N/A	N/A	O	E	0.25	O	N/A	O	E	1.75E-08	N/A	N/A	N/A	N/A	N/A	N/A	N/A	N/A	N/A	N/A	N/A	N/A	N/A
	N/A	H2O			0		N/A	YES	NO	Cylindrical	33.8	65.2	N/A	N/A	N/A	-5	-4.9	-5.1		D	1400	N/A	N/A		N/A		N/A	N/A	O	E	0.25	O	N/A	O	E	2.55E-08	N/A	N/A	N/A	N/A	N/A	N/A	N/A	N/A	N/A	N/A	N/A	N/A	N/A
	N/A	H2O			0		N/A	YES	NO	Cylindrical	25.4	63.5	N/A	N/A	N/A	-5	-4.9	-5.1		D	1400	N/A	N/A		N/A		N/A	N/A	O	E	0.25	O	N/A	O	E	2.35E-08	N/A	N/A	N/A	N/A	N/A	N/A	N/A	N/A	N/A	N/A	N/A	N/A	N/A
	N/A	H2O			0		N/A	YES	NO	Cylindrical	16.3	61.5	N/A	N/A	N/A	-5	-4.9	-5.1		D	1400	N/A	N/A		N/A		N/A	N/A	O	E	0.25	O	N/A	O	E	2.70E-08	N/A	N/A	N/A	N/A	N/A	N/A	N/A	N/A	N/A	N/A	N/A	N/A	N/A
	N/A	H2O			0		N/A	YES	NO	Cylindrical	25.4	17.4	N/A	N/A	N/A	-5	-4.9	-5.1		D	1400	N/A	N/A		N/A		N/A	N/A	O	E	0.25	O	N/A	O	E	2.30E-08	N/A	N/A	N/A	N/A	N/A	N/A	N/A	N/A	N/A	N/A	N/A	N/A	N/A
	N/A	H2O			0		N/A	YES	NO	Cylindrical	25.4	28.7	N/A	N/A	N/A	-5	-4.9	-5.1		D	1400	N/A	N/A		N/A		N/A	N/A	O	E	0.25	O	N/A	O	E	2.70E-08	N/A	N/A	N/A	N/A	N/A	N/A	N/A	N/A	N/A	N/A	N/A	N/A	N/A
	N/A	H2O			0		N/A	YES	NO	Cylindrical	25.4	28.7	N/A	N/A	N/A	-5	-4.9	-5.1		D	1400	N/A	N/A		N/A		N/A	N/A	O	E	0.25	O	N/A	O	E	2.70E-08	N/A	N/A	N/A	N/A	N/A	N/A	N/A	N/A	N/A	N/A	N/A	N/A	N/A
	N/A	H2O			0		N/A	YES	NO	Cylindrical	25.4	96.5	N/A	N/A	N/A	-5	-4.9	-5.1		D	1400	N/A	N/A		N/A		N/A	N/A	O	E	0.25	O	N/A	O	E	1.95E-08	N/A	N/A	N/A	N/A	N/A	N/A	N/A	N/A	N/A	N/A	N/A	N/A	N/A
	N/A	H2O			0		N/A	YES	NO	Cylindrical	25.4	132.3	N/A	N/A	N/A	-5	-4.9	-5.1		D	1400	N/A	N/A		N/A		N/A	N/A	O	E	0.25	O	N/A	O	E	2.25E-08	N/A	N/A	N/A	N/A	N/A	N/A	N/A	N/A	N/A	N/A	N/A	N/A	N/A
	N/A	H2O			0		N/A	YES	NO	Cylindrical	25.4	22.1	N/A	N/A	N/A	-5	-4.9	-5.1		D	1400	N/A	N/A		N/A		N/A	N/A	O	E	0.25	O	N/A	O	E	2.55E-08	N/A	N/A	N/A	N/A	N/A	N/A	N/A	N/A	N/A	N/A	N/A	N/A	N/A
	N/A	H2O			0		N/A	YES	NO	Cylindrical	25.4	36.9	N/A	N/A	N/A	-5	-4.9	-5.1		D	1400	N/A	N/A		N/A		N/A	N/A	O	E	0.25	O	N/A	O	E	2.20E-08	N/A	N/A	N/A	N/A	N/A	N/A	N/A	N/A	N/A	N/A	N/A	N/A	N/A
	N/A	H2O			0		N/A	YES	NO	Cylindrical	25.4	50.1	N/A	N/A	N/A	-5	-4.9	-5.1		D	1400	N/A	N/A		N/A		N/A	N/A	O	E	0.25	O	N/A	O	E	2.15E-08	N/A	N/A	N/A	N/A	N/A	N/A	N/A	N/A	N/A	N/A	N/A	N/A	N/A
	N/A	H2O			0		N/A	YES	NO	Cylindrical	25.4	78.2	N/A	N/A	N/A	-5	-4.9	-5.1		D	1400	N/A	N/A		N/A		N/A	N/A	O	E	0.25	O	N/A	O	E	2.10E-08	N/A	N/A	N/A	N/A	N/A	N/A	N/A	N/A	N/A	N/A	N/A	N/A	N/A
	N/A	H2O			0		N/A	YES	NO	Cylindrical	25.4	115.8	N/A	N/A	N/A	-5	-4.9	-5.1		D	1400	N/A	N/A		N/A		N/A	N/A	O	E	0.25	O	N/A	O	E	2.30E-08	N/A	N/A	N/A	N/A	N/A	N/A	N/A	N/A	N/A	N/A	N/A	N/A	N/A
	N/A	H2O			0		N/A	YES	NO	Cylindrical	90	80	N/A	N/A	N/A	-5	-4.9	-5.1		D	1400	N/A	N/A		N/A		N/A	N/A	O	E	0.25	O	N/A	O	E	1.10E-08	N/A	N/A	N/A	N/A	N/A	N/A	N/A	N/A	N/A	N/A	N/A	N/A	N/A
	N/A	H2O			0		N/A	YES	NO	Cylindrical	90	65	N/A	N/A	N/A	-5	-4.9	-5.1		D	1400	N/A	N/A		N/A		N/A	N/A	O	E	0.25	O	N/A	O	E	1.05E-08	N/A	N/A	N/A	N/A	N/A	N/A	N/A	N/A	N/A	N/A	N/A	N/A	N/A
	N/A	H2O			0		N/A	YES	NO	Cylindrical	90	20	N/A	N/A	N/A	-5	-4.9	-5.1		D	1400	N/A	N/A		N/A		N/A	N/A	O	E	0.25	O	N/A	O	E	1.00E-08	N/A	N/A	N/A	N/A	N/A	N/A	N/A	N/A	N/A	N/A	N/A	N/A	N/A
	N/A	H2O		Simple shear	0	No creep curve, Summary data in a table (Table 3). No detailed strain data.	N/A	YES	NO	Rectangular prism	N/A	N/A	42.5	10.04	19.94	-2	-1.9	-2.1		D	1700	1500	1900		N/A	Jacka & Lile (1984) (page 151)	N/A	N/A	O	E	0.2	O	N/A	O	E	2.30E-07	N/A	N/A	N/A	N/A	N/A	N/A	N/A	N/A	N/A	N/A	N/A	N/A	N/A
	N/A	H2O			0		N/A	YES	NO	Rectangular prism	N/A	N/A	63.6	9.42	15.98	-2	-1.9	-2.1		D	1700	1500	1900		N/A		N/A	N/A	O	E	0.2	O	N/A	O	E	2.00E-07	N/A	N/A	N/A	N/A	N/A	N/A	N/A	N/A	N/A	N/A	N/A	N/A	N/A
	N/A	H2O			0		N/A	YES	NO	Rectangular prism	N/A	N/A	81.25	9.48	20.52	-2	-1.9	-2.1		D	1700	1500	1900		N/A		N/A	N/A	O	E	0.2	O	N/A	O	E	1.30E-07	N/A	N/A	N/A	N/A	N/A	N/A	N/A	N/A	N/A	N/A	N/A	N/A	N/A
	N/A	H2O			0		N/A	YES	NO	Rectangular prism	N/A	N/A	98.7	10.1	21.55	-2	-1.9	-2.1		D	1700	1500	1900		N/A		N/A	N/A	O	E	0.2	O	N/A	O	E	2.50E-07	N/A	N/A	N/A	N/A	N/A	N/A	N/A	N/A	N/A	N/A	N/A	N/A	N/A
	N/A	H2O			0		N/A	YES	NO	Rectangular prism	N/A	N/A	123.18	9.21	20.87	-2	-1.9	-2.1		D	1700	1500	1900		N/A		N/A	N/A	O	E	0.2	O	N/A	O	E	1.40E-07	N/A	N/A	N/A	N/A	N/A	N/A	N/A	N/A	N/A	N/A	N/A	N/A	N/A
	N/A	H2O			0		N/A	YES	NO	Rectangular prism	N/A	N/A	136.76	7.44	20.3	-2	-1.9	-2.1		D	1700	1500	1900		N/A		N/A	N/A	O	E	0.2	O	N/A	O	E	1.10E-07	N/A	N/A	N/A	N/A	N/A	N/A	N/A	N/A	N/A	N/A	N/A	N/A	N/A
	N/A	H2O			0		N/A	YES	NO	Rectangular prism	N/A	N/A	146.02	10.09	20.96	-2	-1.9	-2.1		D	1700	1500	1900		N/A		N/A	N/A	O	E	0.2	O	N/A	O	E	1.50E-07	N/A	N/A	N/A	N/A	N/A	N/A	N/A	N/A	N/A	N/A	N/A	N/A	N/A
	N/A	H2O			0		N/A	YES	NO	Rectangular prism	N/A	N/A	146.77	8.5	20.5	-2	-1.9	-2.1		D	1700	1500	1900		N/A		N/A	N/A	O	E	0.2	O	N/A	O	E	1.10E-07	N/A	N/A	N/A	N/A	N/A	N/A	N/A	N/A	N/A	N/A	N/A	N/A	N/A
	N/A	H2O			0		N/A	YES	NO	Rectangular prism	N/A	N/A	39.75	19.75	9.85	-2	-1.9	-2.1		D	1700	1500	1900		N/A		N/A	N/A	O	E	0.2	O	N/A	O	E	2.80E-07	N/A	N/A	N/A	N/A	N/A	N/A	N/A	N/A	N/A	N/A	N/A	N/A	N/A
	N/A	H2O			0		N/A	YES	NO	Rectangular prism	N/A	N/A	37.94	20.92	16.5	-2	-1.9	-2.1		D	1700	1500	1900		N/A		N/A	N/A	O	E	0.2	O	N/A	O	E	1.30E-07	N/A	N/A	N/A	N/A	N/A	N/A	N/A	N/A	N/A	N/A	N/A	N/A	N/A
	N/A	H2O			0		N/A	YES	NO	Rectangular prism	N/A	N/A	40.2	19	26.65	-2	-1.9	-2.1		D	1700	1500	1900		N/A		N/A	N/A	O	E	0.2	O	N/A	O	E	2.50E-07	N/A	N/A	N/A	N/A	N/A	N/A	N/A	N/A	N/A	N/A	N/A	N/A	N/A
	N/A	H2O			0		N/A	YES	NO	Rectangular prism	N/A	N/A	40.69	21.1	32.67	-2	-1.9	-2.1		D	1700	1500	1900		N/A		N/A	N/A	O	E	0.2	O	N/A	O	E	1.80E-07	N/A	N/A	N/A	N/A	N/A	N/A	N/A	N/A	N/A	N/A	N/A	N/A	N/A
	N/A	H2O			0		N/A	YES	NO	Rectangular prism	N/A	N/A	39.8	19.85	38.76	-2	-1.9	-2.1		D	1700	1500	1900		N/A		N/A	N/A	O	E	0.2	O	N/A	O	E	1.80E-07	N/A	N/A	N/A	N/A	N/A	N/A	N/A	N/A	N/A	N/A	N/A	N/A	N/A
	N/A	H2O			0		N/A	YES	NO	Rectangular prism	N/A	N/A	42.4	20.42	45.4	-2	-1.9	-2.1		D	1700	1500	1900		N/A		N/A	N/A	O	E	0.2	O	N/A	O	E	1.80E-07	N/A	N/A	N/A	N/A	N/A	N/A	N/A	N/A	N/A	N/A	N/A	N/A	N/A
	N/A	H2O			0		N/A	YES	NO	Rectangular prism	N/A	N/A	38.01	18.81	20.7	-2	-1.9	-2.1		D	1700	1500	1900		N/A		N/A	N/A	O	E	0.2	O	N/A	O	E	1.80E-07	N/A	N/A	N/A	N/A	N/A	N/A	N/A	N/A	N/A	N/A	N/A	N/A	N/A
	N/A	H2O			0		N/A	YES	NO	Rectangular prism	N/A	N/A	41.08	23.8	20.54	-2	-1.9	-2.1		D	1700	1500	1900		N/A		N/A	N/A	O	E	0.2	O	N/A	O	E	1.30E-07	N/A	N/A	N/A	N/A	N/A	N/A	N/A	N/A	N/A	N/A	N/A	N/A	N/A
	N/A	H2O			0		N/A	YES	NO	Rectangular prism	N/A	N/A	41.15	29.63	20.35	-2	-1.9	-2.1		D	1700	1500	1900		N/A		N/A	N/A	O	E	0.2	O	N/A	O	E	1.80E-07	N/A	N/A	N/A	N/A	N/A	N/A	N/A	N/A	N/A	N/A	N/A	N/A	N/A
	N/A	H2O			0		N/A	YES	NO	Rectangular prism	N/A	N/A	40.99	33.87	20.74	-2	-1.9	-2.1		D	1700	1500	1900		N/A		N/A	N/A	O	E	0.2	O	N/A	O	E	1.60E-07	N/A	N/A	N/A	N/A	N/A	N/A	N/A	N/A	N/A	N/A	N/A	N/A	N/A
	N/A	H2O			0		N/A	YES	NO	Rectangular prism	N/A	N/A	40.15	38.48	20.75	-2	-1.9	-2.1		D	1700	1500	1900		N/A		N/A	N/A	O	E	0.2	O	N/A	O	E	1.20E-07	N/A	N/A	N/A	N/A	N/A	N/A	N/A	N/A	N/A	N/A	N/A	N/A	N/A
Jacka & Li (1994)	N/A	H2O	Constant stress	Uniaxial compression	0	No creep curve, Summary data in a table (Table 3). No detailed strain data.	N/A	NO	YES	Cylindrical?	N/A	N/A	N/A	N/A	N/A	-10	-9.9	-10.1	Short time (10s) of 0.01K. Long time <0.1K. (Morgan, 1979; Jacka, 1984b)	A	1.20E+06	N/A	N/A	Mean grain area	N/A	N/A	N/A	N/A	N/A	N/A	N/A	N/A	N/A	N/A	N/A	N/A	N/A	N/A	N/A	N/A	N/A	N/A	N/A	N/A	N/A	N/A	N/A	N/A	N/A
	N/A	H2O			0		N/A	NO	YES	Cylindrical?	N/A	N/A	N/A	N/A	N/A	-10	-9.9	-10.1		A	1.20E+06	N/A	N/A		N/A	N/A	N/A	N/A	N/A	N/A	N/A	N/A	N/A	N/A	N/A	N/A	N/A	N/A	N/A	N/A	N/A	N/A	N/A	N/A	N/A	N/A	N/A	N/A	N/A
	N/A	H2O			0		N/A	NO	YES	Cylindrical?	N/A	N/A	N/A	N/A	N/A	-10	-9.9	-10.1		A	1.20E+06	N/A	N/A		N/A	N/A	N/A	N/A	N/A	N/A	N/A	N/A	N/A	N/A	N/A	N/A	N/A	N/A	N/A	N/A	N/A	N/A	N/A	N/A	N/A	N/A	N/A	N/A	N/A
	N/A	H2O			0		N/A	NO	YES	Cylindrical?	N/A	N/A	N/A	N/A	N/A	-10	-9.9	-10.1		A	1.20E+06	N/A	N/A		N/A	N/A	N/A	N/A	N/A	N/A	N/A	N/A	N/A	N/A	N/A	N/A	N/A	N/A	N/A	N/A	N/A	N/A	N/A	N/A	N/A	N/A	N/A	N/A	N/A
	N/A	H2O			0		N/A	NO	YES	Cylindrical?	N/A	N/A	N/A	N/A	N/A	-10	-9.9	-10.1		A	1.20E+06	N/A	N/A		N/A	N/A	N/A	N/A	N/A	N/A	N/A	N/A	N/A	N/A	N/A	N/A	N/A	N/A	N/A	N/A	N/A	N/A	N/A	N/A	N/A	N/A	N/A	N/A	N/A
	N/A	H2O			0		N/A	NO	YES	Cylindrical?	N/A	N/A	N/A	N/A	N/A	-10	-9.9	-10.1		A	5.80E+06	N/A	N/A		N/A	N/A	N/A	N/A	N/A	N/A	N/A	N/A	N/A	N/A	N/A	N/A	N/A	N/A	N/A	N/A	N/A	N/A	N/A	N/A	N/A	N/A	N/A	N/A	N/A
	N/A	H2O			0		N/A	NO	YES	Cylindrical?	N/A	N/A	N/A	N/A	N/A	-10	-9.9	-10.1		A	5.80E+06	N/A	N/A		N/A	N/A	N/A	N/A	N/A	N/A	N/A	N/A	N/A	N/A	N/A	N/A	N/A	N/A	N/A	N/A	N/A	N/A	N/A	N/A	N/A	N/A	N/A	N/A	N/A
	N/A	H2O			0		N/A	NO	YES	Cylindrical?	N/A	N/A	N/A	N/A	N/A	-10	-9.9	-10.1		A	5.80E+06	N/A	N/A		N/A	N/A	N/A	N/A	N/A	N/A	N/A	N/A	N/A	N/A	N/A	N/A	N/A	N/A	N/A	N/A	N/A	N/A	N/A	N/A	N/A	N/A	N/A	N/A	N/A
	N/A	H2O			0		N/A	NO	YES	Cylindrical?	N/A	N/A	N/A	N/A	N/A	-10	-9.9	-10.1		A	5.80E+06	N/A	N/A		N/A	N/A	N/A	N/A	N/A	N/A	N/A	N/A	N/A	N/A	N/A	N/A	N/A	N/A	N/A	N/A	N/A	N/A	N/A	N/A	N/A	N/A	N/A	N/A	N/A
	N/A	H2O			0		N/A	NO	YES	Cylindrical?	N/A	N/A	N/A	N/A	N/A	-10	-9.9	-10.1		A	5.80E+06	N/A	N/A		N/A	N/A	N/A	N/A	N/A	N/A	N/A	N/A	N/A	N/A	N/A	N/A	N/A	N/A	N/A	N/A	N/A	N/A	N/A	N/A	N/A	N/A	N/A	N/A	N/A
	N/A	H2O			0		N/A	NO	YES	Cylindrical?	N/A	N/A	N/A	N/A	N/A	-5	-4.9	-5.1		A	1.20E+06	N/A	N/A		N/A	N/A	N/A	N/A	N/A	N/A	N/A	N/A	N/A	N/A	N/A	N/A	N/A	N/A	N/A	N/A	N/A	N/A	N/A	N/A	N/A	N/A	N/A	N/A	N/A
	N/A	H2O			0		N/A	NO	YES	Cylindrical?	N/A	N/A	N/A	N/A	N/A	-5	-4.9	-5.1		A	1.20E+06	N/A	N/A		N/A	N/A	N/A	N/A	N/A	N/A	N/A	N/A	N/A	N/A	N/A	N/A	N/A	N/A	N/A	N/A	N/A	N/A	N/A	N/A	N/A	N/A	N/A	N/A	N/A
	N/A	H2O			0		N/A	NO	YES	Cylindrical?	N/A	N/A	N/A	N/A	N/A	-5	-4.9	-5.1		A	1.20E+06	N/A	N/A		N/A	N/A	N/A	N/A	N/A	N/A	N/A	N/A	N/A	N/A	N/A	N/A	N/A	N/A	N/A	N/A	N/A	N/A	N/A	N/A	N/A	N/A	N/A	N/A	N/A
	N/A	H2O			0		N/A	NO	YES	Cylindrical?	N/A	N/A	N/A	N/A	N/A	-5	-4.9	-5.1		A	1.20E+06	N/A	N/A		N/A	N/A	N/A	N/A	N/A	N/A	N/A	N/A	N/A	N/A	N/A	N/A	N/A	N/A	N/A	N/A	N/A	N/A	N/A	N/A	N/A	N/A	N/A	N/A	N/A
	N/A	H2O			0		N/A	NO	YES	Cylindrical?	N/A	N/A	N/A	N/A	N/A	-5	-4.9	-5.1		A	1.20E+06	N/A	N/A		N/A	N/A	N/A	N/A	N/A	N/A	N/A	N/A	N/A	N/A	N/A	N/A	N/A	N/A	N/A	N/A	N/A	N/A	N/A	N/A	N/A	N/A	N/A	N/A	N/A
	N/A	H2O			0		N/A	NO	YES	Cylindrical?	N/A	N/A	N/A	N/A	N/A	-5	-4.9	-5.1		A	2.00E+06	N/A	N/A		N/A	N/A	N/A	N/A	N/A	N/A	N/A	N/A	N/A	N/A	N/A	N/A	N/A	N/A	N/A	N/A	N/A	N/A	N/A	N/A	N/A	N/A	N/A	N/A	N/A
	N/A	H2O			0		N/A	NO	YES	Cylindrical?	N/A	N/A	N/A	N/A	N/A	-5	-4.9	-5.1		A	2.00E+06	N/A	N/A		N/A	N/A	N/A	N/A	N/A	N/A	N/A	N/A	N/A	N/A	N/A	N/A	N/A	N/A	N/A	N/A	N/A	N/A	N/A	N/A	N/A	N/A	N/A	N/A	N/A
	N/A	H2O			0		N/A	NO	YES	Cylindrical?	N/A	N/A	N/A	N/A	N/A	-5	-4.9	-5.1		A	2.00E+06	N/A	N/A		N/A	N/A	N/A	N/A	N/A	N/A	N/A	N/A	N/A	N/A	N/A	N/A	N/A	N/A	N/A	N/A	N/A	N/A	N/A	N/A	N/A	N/A	N/A	N/A	N/A
	N/A	H2O			0		N/A	NO	YES	Cylindrical?	N/A	N/A	N/A	N/A	N/A	-3	-2.9	-3.1		A	1.20E+06	N/A	N/A		N/A	N/A	N/A	N/A	N/A	N/A	N/A	N/A	N/A	N/A	N/A	N/A	N/A	N/A	N/A	N/A	N/A	N/A	N/A	N/A	N/A	N/A	N/A	N/A	N/A
	N/A	H2O			0		N/A	NO	YES	Cylindrical?	N/A	N/A	N/A	N/A	N/A	-3	-2.9	-3.1		A	1.20E+06	N/A	N/A		N/A	N/A	N/A	N/A	N/A	N/A	N/A	N/A	N/A	N/A	N/A	N/A	N/A	N/A	N/A	N/A	N/A	N/A	N/A	N/A	N/A	N/A	N/A	N/A	N/A
	N/A	H2O			0		N/A	NO	YES	Cylindrical?	N/A	N/A	N/A	N/A	N/A	-3	-2.9	-3.1		A	1.20E+06	N/A	N/A		N/A	N/A	N/A	N/A	N/A	N/A	N/A	N/A	N/A	N/A	N/A	N/A	N/A	N/A	N/A	N/A	N/A	N/A	N/A	N/A	N/A	N/A	N/A	N/A	N/A
	N/A	H2O			0		N/A	NO	YES	Cylindrical?	N/A	N/A	N/A	N/A	N/A	-3	-2.9	-3.1		A	1.20E+06	N/A	N/A		N/A	N/A	N/A	N/A	N/A	N/A	N/A	N/A	N/A	N/A	N/A	N/A	N/A	N/A	N/A	N/A	N/A	N/A	N/A	N/A	N/A	N/A	N/A	N/A	N/A
	N/A	H2O			0		N/A	NO	YES	Cylindrical?	N/A	N/A	N/A	N/A	N/A	-3	-2.9	-3.1		A	1.20E+06	N/A	N/A		N/A	N/A	N/A	N/A	N/A	N/A	N/A	N/A	N/A	N/A	N/A	N/A	N/A	N/A	N/A	N/A	N/A	N/A	N/A	N/A	N/A	N/A	N/A	N/A	N/A
	N/A	H2O			0		N/A	NO	YES	Cylindrical?	N/A	N/A	N/A	N/A	N/A	-3	-2.9	-3.1		A	1.20E+06	N/A	N/A		N/A	N/A	N/A	N/A	N/A	N/A	N/A	N/A	N/A	N/A	N/A	N/A	N/A	N/A	N/A	N/A	N/A	N/A	N/A	N/A	N/A	N/A	N/A	N/A	N/A
	N/A	H2O			0		N/A	NO	YES	Cylindrical?	N/A	N/A	N/A	N/A	N/A	-2	-1.9	-2.1		A	1.00E+06	N/A	N/A		N/A	N/A	N/A	N/A	N/A	N/A	N/A	N/A	N/A	N/A	N/A	N/A	N/A	N/A	N/A	N/A	N/A	N/A	N/A	N/A	N/A	N/A	N/A	N/A	N/A
	N/A	H2O			0		N/A	NO	YES	Cylindrical?	N/A	N/A	N/A	N/A	N/A	-2	-1.9	-2.1		A	1.00E+06	N/A	N/A		N/A	N/A	N/A	N/A	N/A	N/A	N/A	N/A	N/A	N/A	N/A	N/A	N/A	N/A	N/A	N/A	N/A	N/A	N/A	N/A	N/A	N/A	N/A	N/A	N/A
	N/A	H2O			0		N/A	NO	YES	Cylindrical?	N/A	N/A	N/A	N/A	N/A	-0.1	0	-0.2		A	1.20E+06	N/A	N/A		N/A	N/A	N/A	N/A	N/A	N/A	N/A	N/A	N/A	N/A	N/A	N/A	N/A	N/A	N/A	N/A	N/A	N/A	N/A	N/A	N/A	N/A	N/A	N/A	N/A
	N/A	H2O			0		N/A	NO	YES	Cylindrical?	N/A	N/A	N/A	N/A	N/A	-0.1	0	-0.2		A	1.20E+06	N/A	N/A		N/A	N/A	N/A	N/A	N/A	N/A	N/A	N/A	N/A	N/A	N/A	N/A	N/A	N/A	N/A	N/A	N/A	N/A	N/A	N/A	N/A	N/A	N/A	N/A	N/A
	N/A	H2O			0		N/A	NO	YES	Cylindrical?	N/A	N/A	N/A	N/A	N/A	-0.1	0	-0.2		A	1.20E+06	N/A	N/A		N/A	N/A	N/A	N/A	N/A	N/A	N/A	N/A	N/A	N/A	N/A	N/A	N/A	N/A	N/A	N/A	N/A	N/A	N/A	N/A	N/A	N/A	N/A	N/A	N/A
Goldsby & Kohlstedt (1997)	N/A	H2O	Constant load	Uniaxial compression	0	No detailed mechanical data.	N/A	YES	NO	Cylindrical	25.4?	N/A	N/A	N/A	N/A	-37	-36.5	-37.5	T is piston temperature. T variation in sample should be much lower.	D	8	N/A	N/A	N/A	N/A	N/A	N/A	N/A	N/A	N/A	1E-0.6090	A	N/A	A	T	1E-7.4268	N/A	N/A	N/A	N/A	N/A	N/A	N/A	N/A	N/A	N/A	N/A	N/A	N/A
	N/A	H2O			0		N/A	YES	NO	Cylindrical	25.4?	N/A	N/A	N/A	N/A	-37	-36.5	-37.5		D	8	N/A	N/A	N/A	N/A	N/A	N/A	N/A	N/A	N/A	1E-0.5031	A	N/A	A	T	1E-7.1462	N/A	N/A	N/A	N/A	N/A	N/A	N/A	N/A	N/A	N/A	N/A	N/A	N/A
	N/A	H2O			0		N/A	YES	NO	Cylindrical	25.4?	N/A	N/A	N/A	N/A	-37	-36.5	-37.5		D	8	N/A	N/A	N/A	N/A	N/A	N/A	N/A	N/A	N/A	1E-0.2171	A	N/A	A	T	1E-6.5427	N/A	N/A	N/A	N/A	N/A	N/A	N/A	N/A	N/A	N/A	N/A	N/A	N/A
	N/A	H2O			0		N/A	YES	NO	Cylindrical	25.4?	N/A	N/A	N/A	N/A	-37	-36.5	-37.5		D	8	N/A	N/A	N/A	N/A	N/A	N/A	N/A	N/A	N/A	1E0.1823	A	N/A	A	T	1E-5.9264	N/A	N/A	N/A	N/A	N/A	N/A	N/A	N/A	N/A	N/A	N/A	N/A	N/A
	N/A	H2O			0		N/A	YES	NO	Cylindrical	25.4?	N/A	N/A	N/A	N/A	-37	-36.5	-37.5		D	8	N/A	N/A	N/A	N/A	N/A	N/A	N/A	N/A	N/A	1E0.2077	A	N/A	A	T	1E-5.8328	N/A	N/A	N/A	N/A	N/A	N/A	N/A	N/A	N/A	N/A	N/A	N/A	N/A
	N/A	H2O			0		N/A	YES	NO	Cylindrical	25.4?	N/A	N/A	N/A	N/A	-37	-36.5	-37.5		D	8	N/A	N/A	N/A	N/A	N/A	N/A	N/A	N/A	N/A	1E0.3225	A	N/A	A	T	1E-5.6681	N/A	N/A	N/A	N/A	N/A	N/A	N/A	N/A	N/A	N/A	N/A	N/A	N/A
	N/A	H2O			0		N/A	YES	NO	Cylindrical	25.4?	N/A	N/A	N/A	N/A	-37	-36.5	-37.5		D	8	N/A	N/A	N/A	N/A	N/A	N/A	N/A	N/A	N/A	1E0.4122	A	N/A	A	T	1E-5.5464	N/A	N/A	N/A	N/A	N/A	N/A	N/A	N/A	N/A	N/A	N/A	N/A	N/A
	N/A	H2O			0		N/A	YES	NO	Cylindrical	25.4?	N/A	N/A	N/A	N/A	-37	-36.5	-37.5		D	8	N/A	N/A	N/A	N/A	N/A	N/A	N/A	N/A	N/A	1E0.5576	A	N/A	A	T	1E-5.2519	N/A	N/A	N/A	N/A	N/A	N/A	N/A	N/A	N/A	N/A	N/A	N/A	N/A
	N/A	H2O			0		N/A	YES	NO	Cylindrical	25.4?	N/A	N/A	N/A	N/A	-37	-36.5	-37.5		D	8	N/A	N/A	N/A	N/A	N/A	N/A	N/A	N/A	N/A	1E0.5727	A	N/A	A	T	1E-5.2088	N/A	N/A	N/A	N/A	N/A	N/A	N/A	N/A	N/A	N/A	N/A	N/A	N/A
	N/A	H2O			0		N/A	YES	NO	Cylindrical	25.4?	N/A	N/A	N/A	N/A	-37	-36.5	-37.5		D	8	N/A	N/A	N/A	N/A	N/A	N/A	N/A	N/A	N/A	1E0.7629	A	N/A	A	T	1E-4.8643	N/A	N/A	N/A	N/A	N/A	N/A	N/A	N/A	N/A	N/A	N/A	N/A	N/A
	N/A	H2O			0		N/A	YES	NO	Cylindrical	25.4?	N/A	N/A	N/A	N/A	-37	-36.5	-37.5		D	8	N/A	N/A	N/A	N/A	N/A	N/A	N/A	N/A	N/A	1E0.8886	A	N/A	A	T	1E-4.5696	N/A	N/A	N/A	N/A	N/A	N/A	N/A	N/A	N/A	N/A	N/A	N/A	N/A
	N/A	H2O			0		N/A	YES	NO	Cylindrical	25.4?	N/A	N/A	N/A	N/A	-37	-36.5	-37.5		D	26	N/A	N/A	N/A	N/A	N/A	N/A	N/A	N/A	N/A	1E0.0567	A	N/A	A	T	1E-6.6425	N/A	N/A	N/A	N/A	N/A	N/A	N/A	N/A	N/A	N/A	N/A	N/A	N/A
	N/A	H2O			0		N/A	YES	NO	Cylindrical	25.4?	N/A	N/A	N/A	N/A	-37	-36.5	-37.5		D	26	N/A	N/A	N/A	N/A	N/A	N/A	N/A	N/A	N/A	1E0.0865	A	N/A	A	T	1E-6.6068	N/A	N/A	N/A	N/A	N/A	N/A	N/A	N/A	N/A	N/A	N/A	N/A	N/A
	N/A	H2O			0		N/A	YES	NO	Cylindrical	25.4?	N/A	N/A	N/A	N/A	-37	-36.5	-37.5		D	26	N/A	N/A	N/A	N/A	N/A	N/A	N/A	N/A	N/A	1E0.2861	A	N/A	A	T	1E-6.3167	N/A	N/A	N/A	N/A	N/A	N/A	N/A	N/A	N/A	N/A	N/A	N/A	N/A
	N/A	H2O			0		N/A	YES	NO	Cylindrical	25.4?	N/A	N/A	N/A	N/A	-37	-36.5	-37.5		D	26	N/A	N/A	N/A	N/A	N/A	N/A	N/A	N/A	N/A	1E0.3328	A	N/A	A	T	1E-6.0425	N/A	N/A	N/A	N/A	N/A	N/A	N/A	N/A	N/A	N/A	N/A	N/A	N/A
	N/A	H2O			0		N/A	YES	NO	Cylindrical	25.4?	N/A	N/A	N/A	N/A	-37	-36.5	-37.5		D	26	N/A	N/A	N/A	N/A	N/A	N/A	N/A	N/A	N/A	1E0.4168	A	N/A	A	T	1E-6.0425	N/A	N/A	N/A	N/A	N/A	N/A	N/A	N/A	N/A	N/A	N/A	N/A	N/A
	N/A	H2O			0		N/A	YES	NO	Cylindrical	25.4?	N/A	N/A	N/A	N/A	-37	-36.5	-37.5		D	26	N/A	N/A	N/A	N/A	N/A	N/A	N/A	N/A	N/A	1E0.5217	A	N/A	A	T	1E-6.0112	N/A	N/A	N/A	N/A	N/A	N/A	N/A	N/A	N/A	N/A	N/A	N/A	N/A
	N/A	H2O			0		N/A	YES	NO	Cylindrical	25.4?	N/A	N/A	N/A	N/A	-37	-36.5	-37.5		D	26	N/A	N/A	N/A	N/A	N/A	N/A	N/A	N/A	N/A	1E0.6294	A	N/A	A	T	1E-5.8427	N/A	N/A	N/A	N/A	N/A	N/A	N/A	N/A	N/A	N/A	N/A	N/A	N/A
	N/A	H2O			0		N/A	YES	NO	Cylindrical	25.4?	N/A	N/A	N/A	N/A	-37	-36.5	-37.5		D	26	N/A	N/A	N/A	N/A	N/A	N/A	N/A	N/A	N/A	1E0.7149	A	N/A	A	T	1E-5.6382	N/A	N/A	N/A	N/A	N/A	N/A	N/A	N/A	N/A	N/A	N/A	N/A	N/A
	N/A	H2O			0		N/A	YES	NO	Cylindrical	25.4?	N/A	N/A	N/A	N/A	-37	-36.5	-37.5		D	26	N/A	N/A	N/A	N/A	N/A	N/A	N/A	N/A	N/A	1E0.7830	A	N/A	A	T	1E-5.4296	N/A	N/A	N/A	N/A	N/A	N/A	N/A	N/A	N/A	N/A	N/A	N/A	N/A
	N/A	H2O			0		N/A	YES	NO	Cylindrical	25.4?	N/A	N/A	N/A	N/A	-37	-36.5	-37.5		D	26	N/A	N/A	N/A	N/A	N/A	N/A	N/A	N/A	N/A	1E0.8367	A	N/A	A	T	1E-5.0191	N/A	N/A	N/A	N/A	N/A	N/A	N/A	N/A	N/A	N/A	N/A	N/A	N/A
	N/A	H2O			0		N/A	YES	NO	Cylindrical	25.4?	N/A	N/A	N/A	N/A	-37	-36.5	-37.5		D	26	N/A	N/A	N/A	N/A	N/A	N/A	N/A	N/A	N/A	1E0.8670	A	N/A	A	T	1E-4.9291	N/A	N/A	N/A	N/A	N/A	N/A	N/A	N/A	N/A	N/A	N/A	N/A	N/A
	N/A	H2O			0		N/A	YES	NO	Cylindrical	25.4?	N/A	N/A	N/A	N/A	-37	-36.5	-37.5		D	26	N/A	N/A	N/A	N/A	N/A	N/A	N/A	N/A	N/A	1E0.8951	A	N/A	A	T	1E-4.8102	N/A	N/A	N/A	N/A	N/A	N/A	N/A	N/A	N/A	N/A	N/A	N/A	N/A
	N/A	H2O			0		N/A	YES	NO	Cylindrical	25.4?	N/A	N/A	N/A	N/A	-37	-36.5	-37.5		D	26	N/A	N/A	N/A	N/A	N/A	N/A	N/A	N/A	N/A	1E0.9203	A	N/A	A	T	1E-4.7491	N/A	N/A	N/A	N/A	N/A	N/A	N/A	N/A	N/A	N/A	N/A	N/A	N/A
	N/A	H2O			0		N/A	YES	NO	Cylindrical	25.4?	N/A	N/A	N/A	N/A	-37	-36.5	-37.5		D	26	N/A	N/A	N/A	N/A	N/A	N/A	N/A	N/A	N/A	1E0.9314	A	N/A	A	T	1E-4.6009	N/A	N/A	N/A	N/A	N/A	N/A	N/A	N/A	N/A	N/A	N/A	N/A	N/A
	N/A	H2O			0		N/A	YES	NO	Cylindrical	25.4?	N/A	N/A	N/A	N/A	-37	-36.5	-37.5		D	26	N/A	N/A	N/A	N/A	N/A	N/A	N/A	N/A	N/A	1E0.9773	A	N/A	A	T	1E-4.4208	N/A	N/A	N/A	N/A	N/A	N/A	N/A	N/A	N/A	N/A	N/A	N/A	N/A
	N/A	H2O			0		N/A	YES	NO	Cylindrical	25.4?	N/A	N/A	N/A	N/A	-37	-36.5	-37.5		D	26	N/A	N/A	N/A	N/A	N/A	N/A	N/A	N/A	N/A	1E1.0183	A	N/A	A	T	1E-4.2333	N/A	N/A	N/A	N/A	N/A	N/A	N/A	N/A	N/A	N/A	N/A	N/A	N/A
	N/A	H2O			0		N/A	YES	NO	Cylindrical	25.4?	N/A	N/A	N/A	N/A	-37	-36.5	-37.5		D	40	N/A	N/A	N/A	N/A	N/A	N/A	N/A	N/A	N/A	1E-0.2702	A	N/A	A	T	1E-7.4118	N/A	N/A	N/A	N/A	N/A	N/A	N/A	N/A	N/A	N/A	N/A	N/A	N/A
	N/A	H2O			0		N/A	YES	NO	Cylindrical	25.4?	N/A	N/A	N/A	N/A	-37	-36.5	-37.5		D	40	N/A	N/A	N/A	N/A	N/A	N/A	N/A	N/A	N/A	1E-0.2057	A	N/A	A	T	1E-7.3693	N/A	N/A	N/A	N/A	N/A	N/A	N/A	N/A	N/A	N/A	N/A	N/A	N/A
	N/A	H2O			0		N/A	YES	NO	Cylindrical	25.4?	N/A	N/A	N/A	N/A	-37	-36.5	-37.5		D	40	N/A	N/A	N/A	N/A	N/A	N/A	N/A	N/A	N/A	1E0.0145	A	N/A	A	T	1E-6.9602	N/A	N/A	N/A	N/A	N/A	N/A	N/A	N/A	N/A	N/A	N/A	N/A	N/A
	N/A	H2O			0		N/A	YES	NO	Cylindrical	25.4?	N/A	N/A	N/A	N/A	-37	-36.5	-37.5		D	40	N/A	N/A	N/A	N/A	N/A	N/A	N/A	N/A	N/A	1E0.1176	A	N/A	A	T	1E-6.7230	N/A	N/A	N/A	N/A	N/A	N/A	N/A	N/A	N/A	N/A	N/A	N/A	N/A
	N/A	H2O			0		N/A	YES	NO	Cylindrical	25.4?	N/A	N/A	N/A	N/A	-37	-36.5	-37.5		D	40	N/A	N/A	N/A	N/A	N/A	N/A	N/A	N/A	N/A	1E0.2043	A	N/A	A	T	1E-6.6628	N/A	N/A	N/A	N/A	N/A	N/A	N/A	N/A	N/A	N/A	N/A	N/A	N/A
	N/A	H2O			0		N/A	YES	NO	Cylindrical	25.4?	N/A	N/A	N/A	N/A	-37	-36.5	-37.5		D	40	N/A	N/A	N/A	N/A	N/A	N/A	N/A	N/A	N/A	1E0.4226	A	N/A	A	T	1E-6.1921	N/A	N/A	N/A	N/A	N/A	N/A	N/A	N/A	N/A	N/A	N/A	N/A	N/A
	N/A	H2O			0		N/A	YES	NO	Cylindrical	25.4?	N/A	N/A	N/A	N/A	-37	-36.5	-37.5		D	40	N/A	N/A	N/A	N/A	N/A	N/A	N/A	N/A	N/A	1E0.5579	A	N/A	A	T	1E-5.9337	N/A	N/A	N/A	N/A	N/A	N/A	N/A	N/A	N/A	N/A	N/A	N/A	N/A
	N/A	H2O			0		N/A	YES	NO	Cylindrical	25.4?	N/A	N/A	N/A	N/A	-37	-36.5	-37.5		D	40	N/A	N/A	N/A	N/A	N/A	N/A	N/A	N/A	N/A	1E0.6607	A	N/A	A	T	1E-5.7146	N/A	N/A	N/A	N/A	N/A	N/A	N/A	N/A	N/A	N/A	N/A	N/A	N/A
	N/A	H2O			0		N/A	YES	NO	Cylindrical	25.4?	N/A	N/A	N/A	N/A	-37	-36.5	-37.5		D	40	N/A	N/A	N/A	N/A	N/A	N/A	N/A	N/A	N/A	1E0.7412	A	N/A	A	T	1E-5.5240	N/A	N/A	N/A	N/A	N/A	N/A	N/A	N/A	N/A	N/A	N/A	N/A	N/A
	N/A	H2O			0		N/A	YES	NO	Cylindrical	25.4?	N/A	N/A	N/A	N/A	-37	-36.5	-37.5		D	40	N/A	N/A	N/A	N/A	N/A	N/A	N/A	N/A	N/A	1E0.8147	A	N/A	A	T	1E-5.2864	N/A	N/A	N/A	N/A	N/A	N/A	N/A	N/A	N/A	N/A	N/A	N/A	N/A
	N/A	H2O			0		N/A	YES	NO	Cylindrical	25.4?	N/A	N/A	N/A	N/A	-37	-36.5	-37.5		D	89	N/A	N/A	N/A	N/A	N/A	N/A	N/A	N/A	N/A	1E0.1692	A	N/A	A	T	1E-7.2988	N/A	N/A	N/A	N/A	N/A	N/A	N/A	N/A	N/A	N/A	N/A	N/A	N/A
	N/A	H2O			0		N/A	YES	NO	Cylindrical	25.4?	N/A	N/A	N/A	N/A	-37	-36.5	-37.5		D	89	N/A	N/A	N/A	N/A	N/A	N/A	N/A	N/A	N/A	1E0.1875	A	N/A	A	T	1E-7.1797	N/A	N/A	N/A	N/A	N/A	N/A	N/A	N/A	N/A	N/A	N/A	N/A	N/A
	N/A	H2O			0		N/A	YES	NO	Cylindrical	25.4?	N/A	N/A	N/A	N/A	-37	-36.5	-37.5		D	89	N/A	N/A	N/A	N/A	N/A	N/A	N/A	N/A	N/A	1E0.3300	A	N/A	A	T	1E-6.9394	N/A	N/A	N/A	N/A	N/A	N/A	N/A	N/A	N/A	N/A	N/A	N/A	N/A
	N/A	H2O			0		N/A	YES	NO	Cylindrical	25.4?	N/A	N/A	N/A	N/A	-37	-36.5	-37.5		D	89	N/A	N/A	N/A	N/A	N/A	N/A	N/A	N/A	N/A	1E0.3803	A	N/A	A	T	1E-6.8208	N/A	N/A	N/A	N/A	N/A	N/A	N/A	N/A	N/A	N/A	N/A	N/A	N/A
	N/A	H2O			0		N/A	YES	NO	Cylindrical	25.4?	N/A	N/A	N/A	N/A	-37	-36.5	-37.5		D	89	N/A	N/A	N/A	N/A	N/A	N/A	N/A	N/A	N/A	1E0.5121	A	N/A	A	T	1E-6.3815	N/A	N/A	N/A	N/A	N/A	N/A	N/A	N/A	N/A	N/A	N/A	N/A	N/A
	N/A	H2O			0		N/A	YES	NO	Cylindrical	25.4?	N/A	N/A	N/A	N/A	-37	-36.5	-37.5		D	89	N/A	N/A	N/A	N/A	N/A	N/A	N/A	N/A	N/A	1E0.6162	A	N/A	A	T	1E-6.0213	N/A	N/A	N/A	N/A	N/A	N/A	N/A	N/A	N/A	N/A	N/A	N/A	N/A
	N/A	H2O			0		N/A	YES	NO	Cylindrical	25.4?	N/A	N/A	N/A	N/A	-80	-79.5	-80.5		D	4	3	5	N/A	N/A	N/A	N/A	N/A	N/A	N/A	1E0.6995	A	N/A	A	T	1E-7.2038	N/A	N/A	N/A	N/A	N/A	N/A	N/A	N/A	N/A	N/A	N/A	N/A	N/A
	N/A	H2O			0		N/A	YES	NO	Cylindrical	25.4?	N/A	N/A	N/A	N/A	-80	-79.5	-80.5		D	4	3	5	N/A	N/A	N/A	N/A	N/A	N/A	N/A	1E0.7706	A	N/A	A	T	1E-7.2045	N/A	N/A	N/A	N/A	N/A	N/A	N/A	N/A	N/A	N/A	N/A	N/A	N/A
	N/A	H2O			0		N/A	YES	NO	Cylindrical	25.4?	N/A	N/A	N/A	N/A	-80	-79.5	-80.5		D	4	3	5	N/A	N/A	N/A	N/A	N/A	N/A	N/A	1E0.8584	A	N/A	A	T	1E-6.8945	N/A	N/A	N/A	N/A	N/A	N/A	N/A	N/A	N/A	N/A	N/A	N/A	N/A
	N/A	H2O			0		N/A	YES	NO	Cylindrical	25.4?	N/A	N/A	N/A	N/A	-80	-79.5	-80.5		D	4	3	5	N/A	N/A	N/A	N/A	N/A	N/A	N/A	1E0.9497	A	N/A	A	T	1E-6.7276	N/A	N/A	N/A	N/A	N/A	N/A	N/A	N/A	N/A	N/A	N/A	N/A	N/A
	N/A	H2O			0		N/A	YES	NO	Cylindrical	25.4?	N/A	N/A	N/A	N/A	-80	-79.5	-80.5		D	4	3	5	N/A	N/A	N/A	N/A	N/A	N/A	N/A	1E1.0152	A	N/A	A	T	1E-6.5457	N/A	N/A	N/A	N/A	N/A	N/A	N/A	N/A	N/A	N/A	N/A	N/A	N/A
	N/A	H2O			0		N/A	YES	NO	Cylindrical	25.4?	N/A	N/A	N/A	N/A	-80	-79.5	-80.5		D	4	3	5	N/A	N/A	N/A	N/A	N/A	N/A	N/A	1E1.0873	A	N/A	A	T	1E-6.4083	N/A	N/A	N/A	N/A	N/A	N/A	N/A	N/A	N/A	N/A	N/A	N/A	N/A
	N/A	H2O			0		N/A	YES	NO	Cylindrical	25.4?	N/A	N/A	N/A	N/A	-80	-79.5	-80.5		D	4	3	5	N/A	N/A	N/A	N/A	N/A	N/A	N/A	1E1.1649	A	N/A	A	T	1E-6.1919	N/A	N/A	N/A	N/A	N/A	N/A	N/A	N/A	N/A	N/A	N/A	N/A	N/A
	N/A	H2O			0		N/A	YES	NO	Cylindrical	25.4?	N/A	N/A	N/A	N/A	-80	-79.5	-80.5		D	4	3	5	N/A	N/A	N/A	N/A	N/A	N/A	N/A	1E1.1981	A	N/A	A	T	1E-6.1849	N/A	N/A	N/A	N/A	N/A	N/A	N/A	N/A	N/A	N/A	N/A	N/A	N/A
	N/A	H2O			0		N/A	YES	NO	Cylindrical	25.4?	N/A	N/A	N/A	N/A	-80	-79.5	-80.5		D	4	3	5	N/A	N/A	N/A	N/A	N/A	N/A	N/A	1E1.2296	A	N/A	A	T	1E-6.1013	N/A	N/A	N/A	N/A	N/A	N/A	N/A	N/A	N/A	N/A	N/A	N/A	N/A
	N/A	H2O			0		N/A	YES	NO	Cylindrical	25.4?	N/A	N/A	N/A	N/A	-80	-79.5	-80.5		D	4	3	5	N/A	N/A	N/A	N/A	N/A	N/A	N/A	1E1.2637	A	N/A	A	T	1E-5.9758	N/A	N/A	N/A	N/A	N/A	N/A	N/A	N/A	N/A	N/A	N/A	N/A	N/A
	N/A	H2O			0		N/A	YES	NO	Cylindrical	25.4?	N/A	N/A	N/A	N/A	-65	-64.5	-65.5		D	4	3	5	N/A	N/A	N/A	N/A	N/A	N/A	N/A	1E0.1983	A	N/A	A	T	1E-7.0656	N/A	N/A	N/A	N/A	N/A	N/A	N/A	N/A	N/A	N/A	N/A	N/A	N/A
	N/A	H2O			0		N/A	YES	NO	Cylindrical	25.4?	N/A	N/A	N/A	N/A	-65	-64.5	-65.5		D	4	3	5	N/A	N/A	N/A	N/A	N/A	N/A	N/A	1E0.4181	A	N/A	A	T	1E-6.5349	N/A	N/A	N/A	N/A	N/A	N/A	N/A	N/A	N/A	N/A	N/A	N/A	N/A
	N/A	H2O			0		N/A	YES	NO	Cylindrical	25.4?	N/A	N/A	N/A	N/A	-65	-64.5	-65.5		D	4	3	5	N/A	N/A	N/A	N/A	N/A	N/A	N/A	1E0.5472	A	N/A	A	T	1E-6.0847	N/A	N/A	N/A	N/A	N/A	N/A	N/A	N/A	N/A	N/A	N/A	N/A	N/A
	N/A	H2O			0		N/A	YES	NO	Cylindrical	25.4?	N/A	N/A	N/A	N/A	-65	-64.5	-65.5		D	4	3	5	N/A	N/A	N/A	N/A	N/A	N/A	N/A	1E0.5949	A	N/A	A	T	1E-6.0556	N/A	N/A	N/A	N/A	N/A	N/A	N/A	N/A	N/A	N/A	N/A	N/A	N/A
	N/A	H2O			0		N/A	YES	NO	Cylindrical	25.4?	N/A	N/A	N/A	N/A	-65	-64.5	-65.5		D	4	3	5	N/A	N/A	N/A	N/A	N/A	N/A	N/A	1E0.7302	A	N/A	A	T	1E-5.7189	N/A	N/A	N/A	N/A	N/A	N/A	N/A	N/A	N/A	N/A	N/A	N/A	N/A
	N/A	H2O			0		N/A	YES	NO	Cylindrical	25.4?	N/A	N/A	N/A	N/A	-65	-64.5	-65.5		D	4	3	5	N/A	N/A	N/A	N/A	N/A	N/A	N/A	1E0.7736	A	N/A	A	T	1E-5.6305	N/A	N/A	N/A	N/A	N/A	N/A	N/A	N/A	N/A	N/A	N/A	N/A	N/A
	N/A	H2O			0		N/A	YES	NO	Cylindrical	25.4?	N/A	N/A	N/A	N/A	-65	-64.5	-65.5		D	4	3	5	N/A	N/A	N/A	N/A	N/A	N/A	N/A	1E0.8592	A	N/A	A	T	1E-5.5845	N/A	N/A	N/A	N/A	N/A	N/A	N/A	N/A	N/A	N/A	N/A	N/A	N/A
	N/A	H2O			0		N/A	YES	NO	Cylindrical	25.4?	N/A	N/A	N/A	N/A	-65	-64.5	-65.5		D	4	3	5	N/A	N/A	N/A	N/A	N/A	N/A	N/A	1E0.8965	A	N/A	A	T	1E-5.3677	N/A	N/A	N/A	N/A	N/A	N/A	N/A	N/A	N/A	N/A	N/A	N/A	N/A
Jacka & Li (2000)	N/A	H2O	Constant stress	Uniaxial compression	0	Normalised Creep curve, i.e., strain rate normalised relative to the strain rate at 1% octahedral shear strain (Figs. 7-11). Measured minimum octahedral shear strain rates are provided in the Table 3.	N/A	YES	YES	Cylindrical	25.4	60	N/A	N/A	N/A	-5	-4.9	-5.1	Short time (10s) of 0.01K. Long time <0.1K. (Morgan, 1979; Jacka, 1984b)	D	1700	1500	1900	Initial grain size reported in Jacka & Lile (1984)	N/A	CPO: Rigsby stage?	N/A	0.01	O	E	0.2	O	Stress maintained constant by adding load over time.	O	E	1.10E-08	N/A	N/A	N/A	N/A	N/A	N/A	N/A	N/A	N/A	N/A	N/A	N/A	N/A
	N/A	H2O			0		N/A	YES	YES	Cylindrical	25.4	60	N/A	N/A	N/A	-10	-9.9	-10.1		D	1700	1500	1900		N/A		N/A	0.01	O	E	0.2	O		O	E	4.10E-09	N/A	N/A	N/A	N/A	N/A	N/A	N/A	N/A	N/A	N/A	N/A	N/A	N/A
	N/A	H2O			0		N/A	YES	NO	Cylindrical	25.4	60	N/A	N/A	N/A	-15	-14.9	-15.1		D	1700	1500	1900		N/A		N/A	0.03	O	E	0.1	O		O	E	7.00E-10	N/A	N/A	Imposed at 1% strain.	N/A	N/A	N/A	N/A	N/A	N/A	N/A	N/A	N/A	N/A
	N/A	H2O			0		N/A	YES	YES	Cylindrical	25.4	60	N/A	N/A	N/A	-15	-14.9	-15.1		D	1700	1500	1900		N/A		N/A	0.01	O	E	0.2	O		O	E	3.00E-09	N/A	N/A	N/A	N/A	N/A	N/A	N/A	N/A	N/A	N/A	N/A	N/A	N/A
	N/A	H2O			0		N/A	YES	YES	Cylindrical	25.4	60	N/A	N/A	N/A	-15	-14.9	-15.1		D	1700	1500	1900		N/A		N/A	0.01	O	E	0.3	O		O	E	7.20E-09	N/A	N/A	N/A	N/A	N/A	N/A	N/A	N/A	N/A	N/A	N/A	N/A	N/A
	N/A	H2O			0		N/A	YES	YES	Cylindrical	25.4	60	N/A	N/A	N/A	-15	-14.9	-15.1		D	1700	1500	1900		N/A		N/A	0.01	O	E	0.4	O		O	E	1.40E-08	N/A	N/A	N/A	N/A	N/A	N/A	N/A	N/A	N/A	N/A	N/A	N/A	N/A
	N/A	H2O			0		N/A	YES	YES	Cylindrical	25.4	60	N/A	N/A	N/A	-15	-14.9	-15.1		D	1700	1500	1900		N/A		N/A	0.01	O	E	0.5	O		O	E	3.40E-08	N/A	N/A	N/A	N/A	N/A	N/A	N/A	N/A	N/A	N/A	N/A	N/A	N/A
	N/A	H2O			0		N/A	YES	NO	Cylindrical	25.4	60	N/A	N/A	N/A	-19	-18.9	-19.1		D	1700	1500	1900		N/A		N/A	0.03	O	E	0.1	O		O	E	4.90E-10	N/A	N/A	Imposed at 1% strain.	N/A	N/A	N/A	N/A	N/A	N/A	N/A	N/A	N/A	N/A
	N/A	H2O			0		N/A	YES	YES	Cylindrical	25.4	60	N/A	N/A	N/A	-19	-18.9	-19.1		D	1700	1500	1900		N/A		N/A	0.01	O	E	0.2	O		O	E	1.10E-09	N/A	N/A	N/A	N/A	N/A	N/A	N/A	N/A	N/A	N/A	N/A	N/A	N/A
	N/A	H2O			0		N/A	YES	YES	Cylindrical	25.4	60	N/A	N/A	N/A	-19	-18.9	-19.1		D	1700	1500	1900		N/A		N/A	0.01	O	E	0.3	O		O	E	4.00E-09	N/A	N/A	N/A	N/A	N/A	N/A	N/A	N/A	N/A	N/A	N/A	N/A	N/A
	N/A	H2O			0		N/A	YES	YES	Cylindrical	25.4	60	N/A	N/A	N/A	-19	-18.9	-19.1		D	1700	1500	1900		N/A		N/A	0.01	O	E	0.4	O		O	E	8.90E-09	N/A	N/A	N/A	N/A	N/A	N/A	N/A	N/A	N/A	N/A	N/A	N/A	N/A
	N/A	H2O			0		N/A	YES	YES	Cylindrical	25.4	60	N/A	N/A	N/A	-19	-18.9	-19.1		D	1700	1500	1900		N/A		N/A	0.01	O	E	0.8	O		O	E	7.80E-08	N/A	N/A	N/A	N/A	N/A	N/A	N/A	N/A	N/A	N/A	N/A	N/A	N/A
	N/A	H2O			0		N/A	YES	NO	Cylindrical	25.4	60	N/A	N/A	N/A	-21	-20.9	-21.1		D	1700	1500	1900		N/A		N/A	0.03	O	E	0.2	O		O	E	7.20E-10	N/A	N/A	Imposed at 1% strain.	N/A	N/A	N/A	N/A	N/A	N/A	N/A	N/A	N/A	N/A
	N/A	H2O			0		N/A	YES	YES	Cylindrical	25.4	60	N/A	N/A	N/A	-21	-20.9	-21.1		D	1700	1500	1900		N/A		N/A	0.01	O	E	0.55	O		O	E	1.10E-08	N/A	N/A	N/A	N/A	N/A	N/A	N/A	N/A	N/A	N/A	N/A	N/A	N/A
	N/A	H2O			0		N/A	YES	NO	Cylindrical	25.4	60	N/A	N/A	N/A	-45	-44.9	-45.1		D	1700	1500	1900		N/A		N/A	0.01	O	E	0.55	O		O	E	4.20E-10	N/A	N/A	N/A	N/A	N/A	N/A	N/A	N/A	N/A	N/A	N/A	N/A	N/A
Piazolo et al. (2013)	MD6	D2O	Constant displacement rate	Uniaxial compression	0	Full creep curves (Fig. 1). Summary data in a table (Table 1).	N/A	YES	YES	Cylindrical	25	32 to 40	N/A	N/A	N/A	-7	N/A	N/A	N/A	D	495	475	515	N/A	Normal distribution	N/A	N/A	0.0176	A	E	1.22	A	N/A	A	E	6.00E-07	N/A	N/A	Stress digitised from published creep curve.	Neutron diffraction	D	386	N/A	366	406	N/A	N/A	N/A	N/A
	MD10	D2O			0		N/A	NO	NO	Cylindrical	25	32 to 40	N/A	N/A	N/A	-7	N/A	N/A	N/A	D	495	475	515	N/A		N/A	N/A	0.0188	A	E	2.07	A	N/A	A	E	2.50E-06	N/A	N/A			D	396	N/A	376	416	N/A	N/A	N/A	N/A
	MD4	D2O			0		N/A	NO	NO	Cylindrical	25	32 to 40	N/A	N/A	N/A	-7	N/A	N/A	N/A	D	495	475	515	N/A		N/A	N/A	0.0248	A	E	3.11	A	N/A	A	E	1.00E-05	N/A	N/A			D	385	N/A	365	405	N/A	N/A	N/A	N/A
Montagnat et al (2015)	N/A	H2O	Constant load	Uniaxial compression	0	Full creep curves. No summary data.	N/A	YES	NO	Cylindrical	40	80	N/A	N/A	N/A	-5	-4.9	-5.1	Page 3	A	8.67E+05	3.02E+05	2.12E+06	FA	Grain size is the number weighted mean area	Fabric analyzer and EBSD. But grain size is determined from FA data.	FA: 20 µm step size. EBSD: 50 µm step size	0.01	A	E	0.7	A	N/A	A	E	7.58E-08	N/A	N/A	Strain rate digitised from published creep curve.	FA	A	N/A	8.85E+05	2.45E+05	2.21E+06	N/A	N/A	N/A	N/A
	N/A	H2O			0		N/A	YES	NO	Cylindrical	40	80	N/A	N/A	N/A	-5	-4.9	-5.1		A	8.67E+05	3.02E+05	2.12E+06	FA				0.01	A	E	0.8	A	N/A	A	E	9.75E-08	N/A	N/A		N/A	N/A	N/A	N/A	N/A	N/A	N/A	N/A	N/A	N/A
	N/A	H2O			0		N/A	YES	YES	Cylindrical	40	80	N/A	N/A	N/A	-5	-4.9	-5.1		A	8.67E+05	3.02E+05	2.12E+06	FA				0.0112	A	E	0.75	A	N/A	A	E	9.37E-08	N/A	N/A		N/A	N/A	N/A	N/A	N/A	N/A	N/A	N/A	N/A	N/A
	N/A	H2O			0		N/A	YES	YES	Cylindrical	40	80	N/A	N/A	N/A	-5	-4.9	-5.1		A	8.67E+05	3.02E+05	2.12E+06	FA				0.0093	A	E	0.7	A	N/A	A	E	8.14E-08	N/A	N/A		N/A	N/A	N/A	N/A	N/A	N/A	N/A	N/A	N/A	N/A
	N/A	H2O			0		N/A	YES	YES	Cylindrical	40	80	N/A	N/A	N/A	-5	-4.9	-5.1		A	8.67E+05	3.02E+05	2.12E+06	FA				0.0075	A	E	0.8	A	N/A	A	E	1.61E-07	N/A	N/A		N/A	N/A	N/A	N/A	N/A	N/A	N/A	N/A	N/A	N/A
Vaughan et al. (2017)	def014	H2O	Constant displacement rate	uniaxial compression	0	Full creep curves (Fig. 4)	Vaughan PhD thesis	YES	NO	Cylindrical	40	96.5	N/A	N/A	N/A	-4.6	-4.1	-5.1	Page 3	D	343	N/A	N/A	EBSD	N/A	EBSD	40 µm	0.01	A	E	1.12	A	Stress corrected for surface area expansion.	A	E	1.00E-06	N/A	N/A	N/A	EBSD	D	N/A	355	N/A	N/A	Small grains might not picked up uder large step size (40 µm)	0.2345	N/A	N/A
	def013	H2O			0			YES	NO	Cylindrical	40.4	98	N/A	N/A	N/A	-4.6	-4.1	-5.1		D	343	N/A	N/A	EBSD	N/A	EBSD	50 µm	0.008	A	E	1.13	A		A	E	1.00E-06	N/A	N/A	N/A	EBSD	D	N/A	425	N/A	N/A		0.2753	N/A	N/A
	def012	H2O			0			YES	NO	Cylindrical	40.9	96	N/A	N/A	N/A	-4.96	-4.46	-5.46		D	343	N/A	N/A	EBSD	N/A	EBSD	40 µm	0.096	A	E	1.22	A		A	E	1.00E-06	N/A	N/A	N/A	EBSD	D	N/A	N/A	N/A	N/A		N/A	N/A	N/A
	def011	H2O			0			YES	NO	Cylindrical	41.2	94.2	N/A	N/A	N/A	-4.98	-4.48	-5.48		D	343	N/A	N/A	EBSD	N/A	EBSD	40 µm	0.087	A	E	1.17	A		A	E	1.00E-06	N/A	N/A	N/A	EBSD	D	N/A	N/A	N/A	N/A		N/A	N/A	N/A
	def010	H2O			0			YES	NO	Cylindrical	42	96	N/A	N/A	N/A	-4.83	-4.33	-5.33		D	343	N/A	N/A	EBSD	N/A	EBSD	40 µm	0.085	A	E	1.2	A		A	E	1.00E-06	N/A	N/A	N/A	EBSD	D	N/A	N/A	N/A	N/A		N/A	N/A	N/A
Qi et al. (2017)	PIL032	H2O	Constant displacement rate	Uniaxial compression	10	Full creep curves (Fig. 2). Summary data in a table (Table 1).	Raw logging data (time, displacement, temperature).	YES	YES	Cylindrical	25.4	62	N/A	N/A	N/A	-9.3	-8.8	-9.8	T variation in the sample should be ~0.5K.	D	230	120	340	Area equivalent diameter	Unimodal, log-normal distribution.	EBSD	30 µm	0.0223	A	T	1.85	A	Stress corrected for surface area expansion.	A	T	2.16E-06	N/A	N/A	N/A	N/A	N/A	N/A	N/A	N/A	N/A	N/A	N/A	N/A	Homogeneous
	PIL033	H2O			10			YES	YES	Cylindrical	25.4	50	N/A	N/A	N/A	-9.7	-9.2	-10.2		D	230	120	340			EBSD	30 µm	0.0258	A	T	8.09	A		A	T	2.02E-04	N/A	N/A	N/A	N/A	N/A	N/A	N/A	N/A	N/A	N/A	N/A	N/A
	PIL035	H2O			10			YES	YES	Cylindrical	25.4	49	N/A	N/A	N/A	-9.7	-9.2	-10.2		D	230	120	340			EBSD	30 µm	0.0208	A	T	3.3	A		A	T	1.14E-05	N/A	N/A	N/A	N/A	N/A	N/A	N/A	N/A	N/A	N/A	N/A	N/A
	PIL036	H2O			10			YES	YES	Cylindrical	25.4	48	N/A	N/A	N/A	-9.8	-9.3	-10.3		D	230	120	340			EBSD	30 µm	0.0229	A	T	5.42	A		A	T	4.60E-05	N/A	N/A	N/A	N/A	N/A	N/A	N/A	N/A	N/A	N/A	N/A	N/A
	PIL018	H2O			10			YES	YES	Cylindrical	25.4	61	N/A	N/A	N/A	-9.5	-9	-10		D	630	120	1140			EBSD	30 µm	0.0157	A	T	2.23	A		A	T	1.20E-06	N/A	N/A	N/A	N/A	N/A	N/A	N/A	N/A	N/A	N/A	N/A	N/A
	PIL019	H2O			10			YES	YES	Cylindrical	25.4	56	N/A	N/A	N/A	-9.6	-9.1	-10.1		D	630	120	1140			EBSD	30 µm	0.0146	A	T	6.17	A		A	T	3.81E-05	N/A	N/A	N/A	N/A	N/A	N/A	N/A	N/A	N/A	N/A	N/A	N/A
	PIL020	H2O			10			YES	YES	Cylindrical	25.4	50	N/A	N/A	N/A	-9.3	-8.8	-9.8		D	630	120	1140			EBSD	30 µm	0.0157	A	T	7.61	A		A	T	8.24E-05	N/A	N/A	N/A	N/A	N/A	N/A	N/A	N/A	N/A	N/A	N/A	N/A
	PIL021	H2O			10			YES	YES	Cylindrical	25.4	44	N/A	N/A	N/A	-9.3	-8.8	-9.8		D	630	120	1140			EBSD	30 µm	0.0174	A	T	4.01	A		A	T	1.02E-05	N/A	N/A	N/A	N/A	N/A	N/A	N/A	N/A	N/A	N/A	N/A	N/A
Qi et al. (2019)	PIL082	H2O	Constant displacement rate	Direct shear	20	Full creep curves. Summary data in a table.	Raw logging data (time, displacement, temperature).	YES	NO	Eliptical	N/A	N/A	35.92	25.4	4 to 6	-5.4	-4.9	-5.9	T variation in the sample should be ~0.5K.	D	230	120	340	Area equivalent diameter	Unimodal, log-normal distribution.	EBSD	CPO: 50 µm; grain size 5µm	0.07	S	E	0.87	S	N/A	S	E	7.98E-05	N/A	N/A	N/A	N/A	N/A	N/A	N/A	N/A	N/A	N/A	N/A	N/A	Homogeneous, slight sample flattening
	PIL087	H2O			20			YES	NO	Eliptical	N/A	N/A	35.92	25.4	4 to 6	-5.6	-5.1	-6.1		D	230	120	340			EBSD		0.13	S	E	1.4	S	N/A	S	E	1.08E-04	N/A	N/A	N/A	N/A	N/A	N/A	N/A	N/A	N/A	N/A	N/A	N/A
	PIL091	H2O			20			YES	NO	Eliptical	N/A	N/A	35.92	25.4	4 to 6	-5.6	-5.1	-6.1		D	230	120	340			EBSD		0.09	S	E	1.54	S	N/A	S	E	1.78E-04	N/A	N/A	N/A	N/A	N/A	N/A	N/A	N/A	N/A	N/A	N/A	N/A
	PIL094	H2O			20			YES	YES	Eliptical	N/A	N/A	35.92	25.4	4 to 6	-5.2	-4.7	-5.7		D	230	120	340			EBSD		0.1	S	E	2.02	S	N/A	S	E	1.37E-04	N/A	N/A	N/A	N/A	N/A	N/A	N/A	N/A	N/A	N/A	N/A	N/A
	PIL135	H2O			20			YES	YES	Eliptical	N/A	N/A	35.92	25.4	4 to 6	-30.5	-30	-31		D	230	120	340			EBSD		0.16	S	E	7.03	S	N/A	S	E	1.25E-04	N/A	N/A	N/A	N/A	N/A	N/A	N/A	N/A	N/A	N/A	N/A	N/A
	PIL142	H2O			20			YES	YES	Eliptical	N/A	N/A	35.92	25.4	4 to 6	-29.9	-29.4	-30.4		D	230	120	340			EBSD		0.16	S	E	6.73	S	N/A	S	E	1.28E-04	N/A	N/A	N/A	N/A	N/A	N/A	N/A	N/A	N/A	N/A	N/A	N/A
	PIL143	H2O			20			YES	NO	Eliptical	N/A	N/A	35.92	25.4	4 to 6	-30.6	-30.1	-31.1		D	230	120	340			EBSD		0.1	S	E	6.81	S	N/A	S	E	1.46E-04	N/A	N/A	N/A	N/A	N/A	N/A	N/A	N/A	N/A	N/A	N/A	N/A
	PIL144	H2O			20			YES	YES	Eliptical	N/A	N/A	35.92	25.4	4 to 6	-20.4	-19.9	-20.9		D	230	120	340			EBSD		0.13	S	E	4.6	S	N/A	S	E	1.19E-04	N/A	N/A	N/A	N/A	N/A	N/A	N/A	N/A	N/A	N/A	N/A	N/A
	PIL145	H2O			20			YES	YES	Eliptical	N/A	N/A	35.92	25.4	4 to 6	-20.1	-19.6	-20.6		D	230	120	340			EBSD		0.05	S	E	4.8	S	N/A	S	E	9.49E-05	N/A	N/A	N/A	N/A	N/A	N/A	N/A	N/A	N/A	N/A	N/A	N/A
Fan et al. (2020)	PIL176	H2O	Constant displacement rate	Uniaxial compression	20	Full creep curves (Fig. 3). Summary data in a table (Table 3).	Raw logging data (time, displacement, temperature).	YES	NO	Cylindrical	25.4	30.48	N/A	N/A	N/A	-10	-9.5	-10.5	T variation in the sample should be ~0.5K.	D	291	165	413	Area equivalent diameter	Unimodal, log-normal distribution. Bounds are interquartile range.	EBSD	grain size: 5 µm; CPO: 30 µm	0.02	A	T	1.78	A	Stress corrected for surface area expansion.	A	T	1.03E-05	N/A	N/A	N/A	EBSD	D	156	117	48	250	Unimodal distribution	0.262	> 3.5E5 points	Homogeneous
	PIL163	H2O			20			YES	NO	Cylindrical	25.4	48.77	N/A	N/A	N/A	-10	-9.5	-10.5		D	291	165	413			EBSD		0.01	A	T	2.92	A		A	T	1.03E-05	N/A	N/A	N/A	N/A	N/A	N/A	N/A	N/A	N/A	N/A	N/A	N/A
	PIL178	H2O			20			YES	NO	Cylindrical	25.4	39.62	N/A	N/A	N/A	-10	-9.5	-10.5		D	291	165	413			EBSD		0.02	A	T	2.54	A		A	T	1.11E-05	N/A	N/A	N/A	N/A	N/A	N/A	N/A	N/A	N/A	N/A	N/A	N/A
	PIL177	H2O			20			YES	NO	Cylindrical	25.4	40.64	N/A	N/A	N/A	-10	-9.5	-10.5		D	291	165	413			EBSD		0.03	A	T	2.85	A		A	T	1.11E-05	N/A	N/A	N/A	N/A	N/A	N/A	N/A	N/A	N/A	N/A	N/A	N/A
	PIL007	H2O			20			YES	YES	Cylindrical	25.4	63.75	N/A	N/A	N/A	-10	-9.5	-10.5		D	291	165	413			EBSD		0.02	A	T	2.13	A		A	T	1.03E-05	N/A	N/A	N/A	N/A	N/A	N/A	N/A	N/A	N/A	N/A	N/A	N/A
	PIL254	H2O			20			YES	NO	Cylindrical	25.4	36.62	N/A	N/A	N/A	-20	-19.5	-20.5		D	291	165	413			EBSD		0.02	A	T	4.33	A		A	T	1.03E-05	N/A	N/A	N/A	EBSD	D	114	62	36	174	Unimodal distribution	0.2481	> 1.6E5 points
	PIL182	H2O			20			YES	NO	Cylindrical	25.4	46.99	N/A	N/A	N/A	-20	-19.5	-20.5		D	291	165	413			EBSD		0.02	A	T	4.88	A		A	T	8.09E-06	N/A	N/A	N/A	N/A	N/A	N/A	N/A	N/A	N/A	N/A	N/A	N/A
	PIL184	H2O			20			YES	NO	Cylindrical	25.4	31.24	N/A	N/A	N/A	-20	-19.5	-20.5		D	291	165	413			EBSD		0.04	A	T	3.64	A		A	T	1.13E-05	N/A	N/A	N/A	N/A	N/A	N/A	N/A	N/A	N/A	N/A	N/A	N/A
	PIL185	H2O			20			YES	NO	Cylindrical	25.4	41.66	N/A	N/A	N/A	-20	-19.5	-20.5		D	291	165	413			EBSD		0.03	A	T	4.69	A		A	T	1.09E-05	N/A	N/A	N/A	N/A	N/A	N/A	N/A	N/A	N/A	N/A	N/A	N/A
	PIL255	H2O			20			YES	YES	Cylindrical	25.4	49.53	N/A	N/A	N/A	-20	-19.5	-20.5		D	291	165	413			EBSD		0.03	A	T	4.66	A		A	T	1.10E-05	N/A	N/A	N/A	N/A	N/A	N/A	N/A	N/A	N/A	N/A	N/A	N/A
	PIL165	H2O			20			YES	NO	Cylindrical	25.4	37.85	N/A	N/A	N/A	-30	-29.5	-30.5		D	291	165	413			EBSD		0.03	A	T	8.24	A		A	T	1.08E-05	N/A	N/A	N/A	EBSD	D	149	108	48	241	Unimodal distribution	0.2443	> 2.5E5 points
	PIL162	H2O			20			YES	NO	Cylindrical	25.4	50.55	N/A	N/A	N/A	-30	-29.5	-30.5		D	291	165	413			EBSD		0.03	A	T	8.71	A		A	T	1.07E-05	N/A	N/A	N/A	N/A	N/A	N/A	N/A	N/A	N/A	N/A	N/A	N/A
	PIL164	H2O			20			YES	NO	Cylindrical	25.4	45.97	N/A	N/A	N/A	-30	-29.5	-30.5		D	291	165	413			EBSD		0.03	A	T	8.93	A		A	T	1.03E-05	N/A	N/A	N/A	N/A	N/A	N/A	N/A	N/A	N/A	N/A	N/A	N/A
	PIL166	H2O			20			YES	NO	Cylindrical	25.4	45.47	N/A	N/A	N/A	-30	-29.5	-30.5		D	291	165	413			EBSD		0.03	A	T	7.6	A		A	T	1.11E-05	N/A	N/A	N/A	N/A	N/A	N/A	N/A	N/A	N/A	N/A	N/A	N/A
	PIL268	H2O			20			YES	YES	Cylindrical	25.4	47.24	N/A	N/A	N/A	-30	-29.5	-30.5		D	291	165	413			EBSD		0.02	A	T	7.82	A		A	T	1.10E-05	N/A	N/A	N/A	N/A	N/A	N/A	N/A	N/A	N/A	N/A	N/A	N/A
Fan et al. (2021a)	OIL009	H2O	Constant load	Uniaxial compression	0	Full creep curves (Fig. 2). Summary data in a table (Table 1).	Raw logging data (time, displacement, temperature).	YES	NO	Cylindrical	27	61.41	N/A	N/A	N/A	-4	-3.8	-4.2	T is silicon oil bath temperature, with a variation of 0.5K. T variation in sample should be much lower.	D	545	359	730	Area equivalent diameter	Unimodal, log-normal distribution. Bounds are interquartile.	EBSD	30 µm step size	0.01	A	T	1.02	A	Stress estimated from load and surface area	A	T	1.11E-06	N/A	N/A	N/A	EBSD Map	D	542	501	340	693	Unimodal distribution	0.2514	> 1E5 points	Homogeneous
	OIL008	H2O			0			NO	NO	Cylindrical	27	N/A	N/A	N/A	N/A	-4	-3.8	-4.2		D	545	359	730			EBSD		N/A	A	T	1.01	A		A	T	N/A	N/A	N/A	N/A	N/A	D	N/A	N/A	N/A	N/A	N/A	N/A	N/A
	OIL007	H2O			0			YES	NO	Cylindrical	27	61.3	N/A	N/A	N/A	-4	-3.8	-4.2		D	545	359	730			EBSD		0.02	A	T	1.01	A		A	T	7.60E-07	N/A	N/A	N/A	N/A	D	N/A	N/A	N/A	N/A	N/A	N/A	N/A
	OIL006	H2O			0			YES	YES	Cylindrical	27	61.27	N/A	N/A	N/A	-4	-3.8	-4.2		D	545	359	730			EBSD		0.02	A	T	1.01	A		A	T	6.54E-07	N/A	N/A	N/A	N/A	D	N/A	N/A	N/A	N/A	N/A	N/A	N/A
	OIL041	H2O			0			YES	YES	Cylindrical	27	60.82	N/A	N/A	N/A	-4	-3.8	-4.2		D	545	359	730			EBSD		0.02	A	T	1.01	A		A	T	9.74E-07	N/A	N/A	N/A	N/A	D	N/A	N/A	N/A	N/A	N/A	N/A	N/A
	OIL042	H2O			0			YES	YES	Cylindrical	27	61.12	N/A	N/A	N/A	-4	-3.8	-4.2		D	545	359	730			EBSD		0.02	A	T	1.01	A		A	T	9.43E-07	N/A	N/A	N/A	N/A	D	N/A	N/A	N/A	N/A	N/A	N/A	N/A
	OIL044	H2O			0			YES	YES	Cylindrical	27	61.1	N/A	N/A	N/A	-4	-3.8	-4.2		D	545	359	730			EBSD		0.02	A	T	1.01	A		A	T	8.44E-07	N/A	N/A	N/A	N/A	D	N/A	N/A	N/A	N/A	N/A	N/A	N/A
	OIL045	H2O			0			YES	YES	Cylindrical	27	61.21	N/A	N/A	N/A	-4	-3.8	-4.2		D	545	359	730			EBSD		0.02	A	T	1.01	A		A	T	8.41E-07	N/A	N/A	N/A	N/A	D	N/A	N/A	N/A	N/A	N/A	N/A	N/A
Unpublished	PIL264	H2O	Constant displacement rate	Uniaxial compression	20	N/A	Raw logging data (time, displacement, temperature).	YES	NO	Cylindrical	25.4	43.56	N/A	N/A	N/A	-30	-29.5	-30.5	T variation in the sample should be ~0.5K.	D	291	165	413	Area equivalent diameter	Unimodal, log-normal distribution. Bounds are interquartile.	EBSD	grain size: 5 µm; CPO: 30 µm	0.0246	A	T	8.44	A	Stress corrected for surface area expansion.	A	T	2.80E-05	N/A	N/A	N/A	N/A	N/A	N/A	N/A	N/A	N/A	N/A	N/A	N/A	Homogeneous
	PIL263	H2O			20	N/A		YES	NO	Cylindrical	25.4	41.91	N/A	N/A	N/A	-30	-29.5	-30.5		D	291	165	413			EBSD		0.0241	A	T	8.8	A		A	T	2.80E-05	N/A	N/A	N/A	N/A	N/A	N/A	N/A	N/A	N/A	N/A	N/A	N/A
	PIL261	H2O			20	N/A		YES	YES	Cylindrical	25.4	50.8	N/A	N/A	N/A	-30	-29.5	-30.5		D	291	165	413			EBSD		0.0266	A	T	9.09	A		A	T	2.70E-05	N/A	N/A	N/A	N/A	N/A	N/A	N/A	N/A	N/A	N/A	N/A	N/A
	PIL252	H2O			20	N/A		YES	NO	Cylindrical	25.4	43.94	N/A	N/A	N/A	-30	-29.5	-30.5		D	291	165	413			EBSD		0.0289	A	T	10.92	A		A	T	5.60E-05	N/A	N/A	N/A	N/A	N/A	N/A	N/A	N/A	N/A	N/A	N/A	N/A
Fan et al. (2021a, 2021b)	PIL266	H2O			20	Summary data in a table.		YES	NO	Cylindrical	25.4	44.7	N/A	N/A	N/A	-30	-29.5	-30.5		D	291	165	413			EBSD		0.0274	A	T	11.29	A		A	T	5.40E-05	N/A	N/A	N/A	EBSD	D	135	115	53	200	N/A	0.2586	N/A
	PIL243	H2O			20			YES	YES	Cylindrical	25.4	49.02	N/A	N/A	N/A	-30	-29.5	-30.5		D	291	165	413			EBSD		0.0298	A	T	10.63	A		A	T	5.40E-05	N/A	N/A	N/A	N/A	N/A	N/A	N/A	N/A	N/A	N/A	N/A	N/A
Fan et al. (2021c)	PIL276	H2O	Constant displacement rate	Uniaxial compression	20	Full creep curves (supplementary information). Summary data in a table (Table 1).	Raw logging data (time, displacement, temperature).	YES	NO	Cylindrical	25.4	40.89	N/A	N/A	N/A	-30	-29.5	-30.5	T variation in the sample should be ~0.5K.	D	1293	768	1781	Area equivalent diameter	Log-normal distribution. Bounds are interquartile.	EBSD	5 µm	0.018	A	T	8.82	A	Stress corrected for surface area expansion.	A	T	1.00E-05	N/A	N/A	N/A	N/A	N/A	N/A	N/A	N/A	N/A	N/A	N/A	N/A	Homogeneous
	PIL275	H2O			20			YES	YES	Cylindrical	25.4	44.45	N/A	N/A	N/A	-30	-29.5	-30.5		D	1293	768	1781			EBSD	5 µm	0.0152	A	T	8.27	A		A	T	1.10E-05	N/A	N/A	N/A	N/A	N/A	N/A	N/A	N/A	N/A	N/A	N/A	N/A
	PIL247	H2O			20			YES	YES	Cylindrical	25.4	41.66	N/A	N/A	N/A	-30	-29.5	-30.5		D	1293	768	1781			EBSD	5 µm	0.0326	A	T	8.98	A		A	T	1.10E-05	N/A	N/A	N/A	N/A	N/A	N/A	N/A	N/A	N/A	N/A	N/A	N/A
	PIL272	H2O			20			YES	NO	Cylindrical	25.4	48.77	N/A	N/A	N/A	-30	-29.5	-30.5		D	1293	768	1781			EBSD	5 µm	0.0186	A	T	10.54	A		A	T	2.80E-05	N/A	N/A	N/A	N/A	N/A	N/A	N/A	N/A	N/A	N/A	N/A	N/A
	PIL270	H2O			20			YES	YES	Cylindrical	25.4	41.91	N/A	N/A	N/A	-30	-29.5	-30.5		D	1293	768	1781			EBSD	5 µm	0.0226	A	T	10.78	A		A	T	2.80E-05	N/A	N/A	N/A	N/A	N/A	N/A	N/A	N/A	N/A	N/A	N/A	N/A
	PIL262	H2O			20			YES	YES	Cylindrical	25.4	50.8	N/A	N/A	N/A	-30	-29.5	-30.5		D	1293	768	1781			EBSD	5 µm	0.0239	A	T	10.3	A		A	T	2.60E-05	N/A	N/A	N/A	N/A	N/A	N/A	N/A	N/A	N/A	N/A	N/A	N/A
	PIL273	H2O			20			YES	NO	Cylindrical	25.4	46.48	N/A	N/A	N/A	-30	-29.5	-30.5		D	1293	768	1781			EBSD	5 µm	0.0189	A	T	12.37	A		A	T	5.40E-05	N/A	N/A	N/A	N/A	N/A	N/A	N/A	N/A	N/A	N/A	N/A	N/A
	PIL271	H2O			20			YES	YES	Cylindrical	25.4	42.42	N/A	N/A	N/A	-30	-29.5	-30.5		D	1293	768	1781			EBSD	5 µm	0.0257	A	T	12.1	A		A	T	5.60E-05	N/A	N/A	N/A	N/A	N/A	N/A	N/A	N/A	N/A	N/A	N/A	N/A
	PIL241	H2O			20			YES	YES	Cylindrical	25.4	51.56	N/A	N/A	N/A	-30	-29.5	-30.5		D	1293	768	1781			EBSD	5 µm	0.0226	A	T	12.83	A		A	T	5.40E-05	N/A	N/A	N/A	N/A	N/A	N/A	N/A	N/A	N/A	N/A	N/A	N/A
Qi & Goldsby (2021)	PIL002	H2O	Constant displacement rate	Uniaxial compression	10	Peak and flow stresses are plotted in Figure 6. Summary data in tables (Table 1, 2).	Raw logging data (time, displacement, temperature).	YES	YES	Cylindrical	25.4	57.15	N/A	N/A	N/A	-9.6	-9.1	-10.1	T variation in the sample should be ~0.5K.	D	230	120	340	Area equivalent diameter	Unimodal, log-normal distribution.	EBSD	grain size: 5-7 µm	0.02	A	T	4.95	A	Stress corrected for surface area expansion.	A	T	4.00E-05	N/A	N/A	N/A	N/A	N/A	N/A	N/A	N/A	N/A	N/A	N/A	N/A	Homogeneous
	PIL004	H2O			10			YES	YES	Cylindrical	25.4	53.34	N/A	N/A	N/A	-9.6	-9.1	-10.1		D	230	120	340			EBSD		0.02	A	T	8.96	A		A	T	4.57E-04	N/A	N/A	N/A	N/A	N/A	N/A	N/A	N/A	N/A	N/A	N/A	N/A
	PIL005	H2O			10			YES	YES	Cylindrical	25.4	66.04	N/A	N/A	N/A	-9.6	-9.1	-10.1		D	230	120	340			EBSD		0.02	A	T	6.84	A		A	T	1.03E-04	N/A	N/A	N/A	N/A	N/A	N/A	N/A	N/A	N/A	N/A	N/A	N/A
	PIL014	H2O			10			YES	YES	Cylindrical	25.4	43.94	N/A	N/A	N/A	-9.6	-9.1	-10.1		D	230	120	340			EBSD		0.02	A	T	7.19	A		A	T	1.59E-04	N/A	N/A	N/A	N/A	N/A	N/A	N/A	N/A	N/A	N/A	N/A	N/A
	PIL027	H2O			10			YES	YES	Cylindrical	25.4	57.15	N/A	N/A	N/A	-9.6	-9.1	-10.1		D	230	120	340			EBSD		0.02	A	T	4.94	A		A	T	3.49E-05	N/A	N/A	N/A	N/A	N/A	N/A	N/A	N/A	N/A	N/A	N/A	N/A
	PIL034	H2O			10			YES	YES	Cylindrical	25.4	57.4	N/A	N/A	N/A	-9.6	-9.1	-10.1		D	230	120	340			EBSD		0.02	A	T	9.12	A		A	T	3.26E-04	N/A	N/A	N/A	N/A	N/A	N/A	N/A	N/A	N/A	N/A	N/A	N/A
	PIL038	H2O			20			YES	YES	Cylindrical	25.4	48.26	N/A	N/A	N/A	-9.6	-9.1	-10.1		D	230	120	340			EBSD		0.02	A	T	6.25	A		A	T	9.55E-05	N/A	N/A	N/A	N/A	N/A	N/A	N/A	N/A	N/A	N/A	N/A	N/A
	PIL040	H2O			20			YES	YES	Cylindrical	25.4	54.36	N/A	N/A	N/A	-9.6	-9.1	-10.1		D	230	120	340			EBSD		0.02	A	T	8.03	A		A	T	1.69E-04	N/A	N/A	N/A	N/A	N/A	N/A	N/A	N/A	N/A	N/A	N/A	N/A
	PIL041	H2O			20			YES	YES	Cylindrical	25.4	57.66	N/A	N/A	N/A	-9.6	-9.1	-10.1		D	230	120	340			EBSD		0.02	A	T	9.83	A		A	T	4.00E-04	N/A	N/A	N/A	N/A	N/A	N/A	N/A	N/A	N/A	N/A	N/A	N/A
	PIL045	H2O			20			YES	YES	Cylindrical	25.4	74.63	N/A	N/A	N/A	-9.6	-9.1	-10.1		D	230	120	340			EBSD		0.02	A	T	7.11	A		A	T	9.59E-05	N/A	N/A	N/A	N/A	N/A	N/A	N/A	N/A	N/A	N/A	N/A	N/A
	PIL051	H2O			20			YES	YES	Cylindrical	25.4	55.37	N/A	N/A	N/A	-9.6	-9.1	-10.1		D	230	120	340			EBSD		0.02	A	T	9.44	A		A	T	3.14E-04	N/A	N/A	N/A	N/A	N/A	N/A	N/A	N/A	N/A	N/A	N/A	N/A
	PIL053	H2O			20			YES	YES	Cylindrical	25.4	67.56	N/A	N/A	N/A	-9.6	-9.1	-10.1		D	230	120	340			EBSD		0.02	A	T	10.45	A		A	T	4.89E-04	N/A	N/A	N/A	N/A	N/A	N/A	N/A	N/A	N/A	N/A	N/A	N/A
	PIL072	H2O			20			YES	YES	Cylindrical	25.4	71.63	N/A	N/A	N/A	-9.6	-9.1	-10.1		D	230	120	340			EBSD		0.02	A	T	6.32	A		A	T	8.00E-05	N/A	N/A	N/A	N/A	N/A	N/A	N/A	N/A	N/A	N/A	N/A	N/A
	PIL105	H2O			20			YES	YES	Cylindrical	25.4	69.34	N/A	N/A	N/A	-9.6	-9.1	-10.1		D	230	120	340			EBSD		0.02	A	T	4.49	A		A	T	2.53E-05	N/A	N/A	N/A	N/A	N/A	N/A	N/A	N/A	N/A	N/A	N/A	N/A
	PIL106	H2O			20			YES	YES	Cylindrical	25.4	63.75	N/A	N/A	N/A	-9.6	-9.1	-10.1		D	230	120	340			EBSD		0.02	A	T	4.87	A		A	T	3.95E-05	N/A	N/A	N/A	N/A	N/A	N/A	N/A	N/A	N/A	N/A	N/A	N/A
	PIL107	H2O			20			YES	YES	Cylindrical	25.4	50.04	N/A	N/A	N/A	-9.6	-9.1	-10.1		D	230	120	340			EBSD		0.02	A	T	6.36	A		A	T	6.00E-05	N/A	N/A	N/A	N/A	N/A	N/A	N/A	N/A	N/A	N/A	N/A	N/A
	PIL023	H2O			10			YES	YES	Cylindrical	25.4	48.77	N/A	N/A	N/A	-9.6	-9.1	-10.1		D	630	120	1140			EBSD		0.02	A	T	10.89	A		A	T	3.52E-04	N/A	N/A	N/A	N/A	N/A	N/A	N/A	N/A	N/A	N/A	N/A	N/A
	PIL026	H2O			10			YES	YES	Cylindrical	25.4	68.58	N/A	N/A	N/A	-9.6	-9.1	-10.1		D	630	120	1140			EBSD		0.02	A	T	5.57	A		A	T	3.10E-05	N/A	N/A	N/A	N/A	N/A	N/A	N/A	N/A	N/A	N/A	N/A	N/A
																																		0.00E+00
																																		0.00E+00
																																		0.00E+00
																																		0.00E+00
																																		0.00E+00
																																		0.00E+00
																																		0.00E+00
																																		0.00E+00
																																		0.00E+00
[truncated: 23 more columns]

## Sheet: Supplementary Table 2
Source	GS_ini_mean	GS_ini_upper	GS_ini_lower	rate_c	strain_c	stress_c	T_mean	T_upper	T_lower	exp_type
Glen (1955)	0.0015	0.00195	0.00105	1.23232323232323e-08	0.0100503	0.28	270.9	271.4	270.4	Constant load
Glen (1955)	0.0015	0.00195	0.00105	3.3030303030303e-09	0.0100503	0.22	266.2	266.7	265.7	Constant load
Glen (1955)	0.0015	0.00195	0.00105	8.2929292929293e-08	0.0100503	0.6	266.3	266.8	265.8	Constant load
Glen (1955)	0.0015	0.00195	0.00105	1.56565656565657e-08	0.0100503	0.59	260.3	260.8	259.8	Constant load
Duval & Gac (1980)	0.0018	0.00234	0.00126	1.91919191919192e-08	0.0100503	0.5	268.4	268.9	267.9	Constant stress
Duval & Gac (1980)	0.00506	0.006578	0.003542	9.09090909090909e-09	0.0100503	0.5	266	266.5	265.5	Constant stress
Duval & Gac (1980)	0.00107	0.001391	0.000749	1.01010101010101e-08	0.0100503	0.48	265.8	266.3	265.3	Constant stress
Duval & Gac (1980)	0.0011	0.00143	0.00077	1.21212121212121e-08	0.0100503	0.5	265.8	266.3	265.3	Constant stress
Duval & Gac (1980)	0.0014	0.00182	0.00098	8.08080808080808e-09	0.0100503	0.48	265.8	266.3	265.3	Constant stress
Duval & Gac (1980)	0.007	0.0091	0.0049	4.04040404040404e-09	0.0100503	0.49	265.8	266.3	265.3	Constant stress
Duval & Gac (1980)	0.00188	0.002444	0.001316	7.07070707070707e-09	0.0100503	0.49	265.8	266.3	265.3	Constant stress
Mellor and Cole (1982)	0.0012	0.00156	0.00084	1.03040711182948e-07	0.0101514	0.8	268	268.5	267.5	Constant stress
Mellor and Cole (1982)	0.0012	0.00156	0.00084	2.29177183240787e-07	0.00954541	1	268	268.5	267.5	Constant stress
Mellor and Cole (1982)	0.0012	0.00156	0.00084	1.04061426550818e-07	0.0102524	0.8	268	268.5	267.5	Constant stress
Mellor and Cole (1982)	0.0012	0.00156	0.00084	2.269060104881e-07	0.00843548	1	268	268.5	267.5	Constant stress
Mellor and Cole (1982)	0.0012	0.00156	0.00084	1.16479286944191e-06	0.0127813	1.45	268	268.5	267.5	Constant displacement rate
Mellor and Cole (1982)	0.0012	0.00156	0.00084	7.89793438639125e-07	0.0124775	1.24	268	268.5	267.5	Constant displacement rate
Mellor and Cole (1982)	0.0012	0.00156	0.00084	5.36437246963563e-07	0.0120726	1.15	268	268.5	267.5	Constant displacement rate
Mellor and Cole (1982)	0.0012	0.00156	0.00084	7.88197251414713e-07	0.0104545	1.34	268	268.5	267.5	Constant displacement rate
Durham et al. (1983)	0.0015	0.00195	0.00105	0.00035	0.01	23.2	243	243.5	242.5	Constant displacement rate
Durham et al. (1983)	0.0015	0.00195	0.00105	0.00035	0.01	14.4	258	258.5	257.5	Constant displacement rate
Jacka (1984a)	0.0017	0.00221	0.00119	1.323587291915e-09	0.0127673	0.212132	268	268.5	267.5	Constant stress
Jacka (1984a)	0.0017	0.00221	0.00119	2.84342528881164e-09	0.0106339	0.275772	268	268.5	267.5	Constant stress
Jacka (1984a)	0.0017	0.00221	0.00119	1.23515041237016e-08	0.00779287	0.424264	268	268.5	267.5	Constant stress
Jacka (1984a)	0.0017	0.00221	0.00119	5.53415162304123e-08	0.00679941	0.636396	268	268.5	267.5	Constant stress
Jacka (1984a)	0.0017	0.00221	0.00119	2.69631511995446e-07	0.00694131	1.27279	268	268.5	267.5	Constant stress
Jacka (1984a)	0.0017	0.00221	0.00119	9.92749342557155e-07	0.00566462	1.69706	268	268.5	267.5	Constant stress
Jacka (1984a)	0.0017	0.00221	0.00119	4.97144541431837e-09	0.00878679	0.424264	262.4	262.9	261.9	Constant stress
Jacka (1984a)	0.0017	0.00221	0.00119	1.70401567161319e-08	0.00821878	0.636396	262.4	262.9	261.9	Constant stress
Jacka (1984a)	0.0017	0.00221	0.00119	4.12064729077667e-08	0.00949703	0.848528	262.4	262.9	261.9	Constant stress
Jacka (1984a)	0.0017	0.00221	0.00119	1.420512953226e-07	0.00892882	1.27279	262.4	262.9	261.9	Constant stress
Jacka (1984a)	0.0017	0.00221	0.00119	3.69411349646877e-07	0.00935497	1.69706	262.4	262.9	261.9	Constant stress
Jacka (1984a)	0.0017	0.00221	0.00119	5.68685057762328e-07	0.0106339	2.12132	262.4	262.9	261.9	Constant stress
Jacka (1984a)	0.0017	0.00221	0.00119	4.68505328830062e-10	0.00779287	0.275772	255.2	255.7	254.7	Constant stress
Jacka (1984a)	0.0017	0.00221	0.00119	4.68736281921446e-09	0.00878679	0.636396	255.2	255.7	254.7	Constant stress
Jacka (1984a)	0.0017	0.00221	0.00119	1.02255337338622e-08	0.00850277	0.848528	255.2	255.7	254.7	Constant stress
Jacka (1984a)	0.0017	0.00221	0.00119	3.69775247912811e-08	0.0113448	1.27279	255.2	255.7	254.7	Constant stress
Jacka (1984a)	0.0017	0.00221	0.00119	8.24187443713449e-08	0.00963911	1.69706	255.2	255.7	254.7	Constant stress
Jacka (1984a)	0.0017	0.00221	0.00119	2.98580649166785e-07	0.0107761	2.54558	255.2	255.7	254.7	Constant stress
Jacka (1984a)	0.0017	0.00221	0.00119	7.1000652983883e-11	0.00821878	0.148492	240.5	241	240	Constant stress
Jacka (1984a)	0.0017	0.00221	0.00119	1.56223432045118e-10	0.00850277	0.212132	240.5	241	240	Constant stress
Jacka (1984a)	0.0017	0.00221	0.00119	2.13031952788797e-10	0.00850277	0.275772	240.5	241	240	Constant stress
Jacka (1984a)	0.0017	0.00221	0.00119	4.54820081937125e-10	0.0100654	0.424264	240.5	241	240	Constant stress
Jacka (1984a)	0.0017	0.00221	0.00119	1.84614695119492e-09	0.00836077	0.763675	240.5	241	240	Constant stress
Jacka (1984a)	0.0017	0.00221	0.00119	4.68373352171394e-09	0.00722512	1.06066	240.5	241	240	Constant stress
Jacka (1984a)	0.0017	0.00221	0.00119	7.80567262715497e-09	0.00708321	1.27279	240.5	241	240	Constant stress
Jacka (1984a)	0.0017	0.00221	0.00119	1.42121278257613e-08	0.0099233	1.69706	240.5	241	240	Constant stress
Jacka (1984a)	0.0017	0.00221	0.00119	2.98622636486332e-08	0.0110604	2.12132	240.5	241	240	Constant stress
Jacka (1984b)	0.0045	0.00585	0.00315	4.8491163278413e-08	0.0170405	0.636396	266	266.5	265.5	Constant load
Jacka (1984b)	0.004	0.0052	0.0028	4.55107997431153e-08	0.0113448	0.636396	266	266.5	265.5	Constant load
Jacka (1984b)	0.0025	0.00325	0.00175	7.11106245986176e-08	0.0113448	0.636396	266	266.5	265.5	Constant load
Jacka (1984b)	0.0022	0.00286	0.00154	4.55747752715393e-08	0.0141907	0.636396	266	266.5	265.5	Constant load
Jacka (1984b)	0.0015	0.00195	0.00105	3.55803035461021e-08	0.0127673	0.636396	266	266.5	265.5	Constant load
Jacka (1984b)	0.0045	0.00585	0.00315	1.70665499036682e-08	0.0113448	0.551543	263	263.5	262.5	Constant load
Jacka (1984b)	0.0045	0.00585	0.00315	1.56443374116959e-08	0.0113448	0.551543	263	263.5	262.5	Constant load
Jacka (1984b)	0.004	0.0052	0.0028	1.71864658567289e-08	0.0256133	0.551543	263	263.5	262.5	Constant load
Jacka (1984b)	0.0025	0.00325	0.00175	1.57762322383372e-08	0.0284787	0.551543	263	263.5	262.5	Constant load
Jacka (1984b)	0.0022	0.00286	0.00154	1.43420293075792e-08	0.0284787	0.551543	263	263.5	262.5	Constant load
Jacka (1984b)	0.0015	0.00195	0.00105	1.33380872560487e-08	0.0284787	0.551543	263	263.5	262.5	Constant load
Jacka (1984b)	0.0045	0.00585	0.00315	1.85277461612361e-07	0.0156151	1.06066	264	264.5	263.5	Constant load
Jacka (1984b)	0.0025	0.00325	0.00175	1.28269011885481e-07	0.0156151	1.06066	264	264.5	263.5	Constant load
Jacka (1984b)	0.0022	0.00286	0.00154	1.1519921184976e-07	0.0113448	1.06066	264	264.5	263.5	Constant load
Jacka (1984b)	0.0015	0.00195	0.00105	1.84757661734897e-07	0.0099233	1.06066	264	264.5	263.5	Constant load
Jacka & Maccagnan (1984)	0.0022	0.00286	0.00154	2.8444249839447e-08	0.0113448	0.424264	270	270.5	269.5	Constant stress
Jacka & Maccagnan (1984)	0.0022	0.00286	0.00154	2.76684872823886e-08	0.0170405	0.424264	270	270.5	269.5	Constant stress
Gao & Jacka (1987)	7e-04	0.00091	0.00049	2.24551619647029e-08	0.0099233	0.424264	269.7	270.2	269.2	Constant stress
Jacka (1994)	0.0017	0.00221	0.00119	1.56344403165887e-08	0.0100654	0.424264	269.7	270.2	269.2	Constant stress
Jacka (1994)	0.0017	0.00221	0.00119	1.98997782057215e-08	0.0102075	0.424264	269.7	270.2	269.2	Constant stress
Jacka (1994)	0.0017	0.00221	0.00119	2.8470240489159e-08	0.0131942	0.424264	269.7	270.2	269.2	Constant stress
Jacka (1994)	0.0017	0.00221	0.00119	1.56311411738758e-08	0.00963911	0.424264	269.7	270.2	269.2	Constant stress
Jacka (1994)	0.0014	0.00182	0.00098	2.06510700449163e-08	0.0141907	0.53033	268	268.5	267.5	Constant stress
Jacka (1994)	0.0014	0.00182	0.00098	2.20752817721519e-08	0.0141907	0.53033	268	268.5	267.5	Constant stress
Jacka (1994)	0.0014	0.00182	0.00098	2.42115993630053e-08	0.0141907	0.53033	268	268.5	267.5	Constant stress
Jacka (1994)	0.0014	0.00182	0.00098	4.20142459534503e-08	0.0141907	0.53033	268	268.5	267.5	Constant stress
Jacka (1994)	0.0014	0.00182	0.00098	4.84231987260105e-08	0.0141907	0.53033	268	268.5	267.5	Constant stress
Jacka (1994)	0.0029	0.00377	0.00203	1.85147524540629e-08	0.0141907	0.53033	268	268.5	267.5	Constant stress
Jacka (1994)	0.0029	0.00377	0.00203	2.13631759085341e-08	0.0141907	0.53033	268	268.5	267.5	Constant stress
Jacka (1994)	0.0029	0.00377	0.00203	1.99389641812985e-08	0.0141907	0.53033	268	268.5	267.5	Constant stress
Jacka (1994)	0.0029	0.00377	0.00203	4.69989869987749e-08	0.0141907	0.53033	268	268.5	267.5	Constant stress
Jacka (1994)	0.0029	0.00377	0.00203	5.91047866802776e-08	0.0141907	0.53033	268	268.5	267.5	Constant stress
Jacka (1994)	0.0014	0.00182	0.00098	2.42115993630053e-08	0.0141907	0.53033	268	268.5	267.5	Constant stress
Jacka (1994)	0.0014	0.00182	0.00098	2.49237052266231e-08	0.0141907	0.53033	268	268.5	267.5	Constant stress
Jacka (1994)	0.0014	0.00182	0.00098	3.63173990445079e-08	0.0141907	0.53033	268	268.5	267.5	Constant stress
Jacka (1994)	0.0014	0.00182	0.00098	3.34689755900367e-08	0.0141907	0.53033	268	268.5	267.5	Constant stress
Jacka (1994)	0.0014	0.00182	0.00098	3.84537166353613e-08	0.0141907	0.53033	268	268.5	267.5	Constant stress
Jacka (1994)	0.0014	0.00182	0.00098	3.27568697264189e-08	0.0141907	0.53033	268	268.5	267.5	Constant stress
Jacka (1994)	0.0014	0.00182	0.00098	3.84537166353613e-08	0.0141907	0.53033	268	268.5	267.5	Constant stress
Jacka (1994)	0.0014	0.00182	0.00098	3.84537166353613e-08	0.0141907	0.53033	268	268.5	267.5	Constant stress
Jacka (1994)	0.0014	0.00182	0.00098	2.77721286810943e-08	0.0141907	0.53033	268	268.5	267.5	Constant stress
Jacka (1994)	0.0014	0.00182	0.00098	3.20447638628011e-08	0.0141907	0.53033	268	268.5	267.5	Constant stress
Jacka (1994)	0.0014	0.00182	0.00098	3.63173990445079e-08	0.0141907	0.53033	268	268.5	267.5	Constant stress
Jacka (1994)	0.0014	0.00182	0.00098	3.13326579991833e-08	0.0141907	0.53033	268	268.5	267.5	Constant stress
Jacka (1994)	0.0014	0.00182	0.00098	3.06205521355655e-08	0.0141907	0.53033	268	268.5	267.5	Constant stress
Jacka (1994)	0.0014	0.00182	0.00098	2.99084462719477e-08	0.0141907	0.53033	268	268.5	267.5	Constant stress
Jacka (1994)	0.0014	0.00182	0.00098	3.27568697264189e-08	0.0141907	0.53033	268	268.5	267.5	Constant stress
Jacka (1994)	0.0014	0.00182	0.00098	1.56663289995916e-08	0.0141907	0.53033	268	268.5	267.5	Constant stress
Jacka (1994)	0.0014	0.00182	0.00098	1.49542231359738e-08	0.0141907	0.53033	268	268.5	267.5	Constant stress
Jacka (1994)	0.0014	0.00182	0.00098	1.4242117272356e-08	0.0141907	0.53033	268	268.5	267.5	Constant stress
Goldsby & Kohlstedt (1997)	8e-06	1.04e-05	5.6e-06	3.74282912240805e-08	0.01	0.246037	236	236.5	235.5	Constant load
Goldsby & Kohlstedt (1997)	8e-06	1.04e-05	5.6e-06	7.14167364109734e-08	0.01	0.313979	236	236.5	235.5	Constant load
Goldsby & Kohlstedt (1997)	8e-06	1.04e-05	5.6e-06	2.8661571574642e-07	0.01	0.606597	236	236.5	235.5	Constant load
Goldsby & Kohlstedt (1997)	8e-06	1.04e-05	5.6e-06	1.18467711758148e-06	0.01	1.5216	236	236.5	235.5	Constant load
Goldsby & Kohlstedt (1997)	8e-06	1.04e-05	5.6e-06	1.46960289897965e-06	0.01	1.61324	236	236.5	235.5	Constant load
Goldsby & Kohlstedt (1997)	8e-06	1.04e-05	5.6e-06	2.14733597482085e-06	0.01	2.10136	236	236.5	235.5	Constant load
Goldsby & Kohlstedt (1997)	8e-06	1.04e-05	5.6e-06	2.84184246806359e-06	0.01	2.58345	236	236.5	235.5	Constant load
Goldsby & Kohlstedt (1997)	8e-06	1.04e-05	5.6e-06	5.59886505286027e-06	0.01	3.61077	236	236.5	235.5	Constant load
Goldsby & Kohlstedt (1997)	8e-06	1.04e-05	5.6e-06	6.18301072751713e-06	0.01	3.73852	236	236.5	235.5	Constant load
Goldsby & Kohlstedt (1997)	8e-06	1.04e-05	5.6e-06	1.36678435823935e-05	0.01	5.79295	236	236.5	235.5	Constant load
Goldsby & Kohlstedt (1997)	8e-06	1.04e-05	5.6e-06	2.69401494106367e-05	0.01	7.73749	236	236.5	235.5	Constant load
Goldsby & Kohlstedt (1997)	2.6e-05	3.38e-05	1.82e-05	2.27771824185732e-07	0.01	1.13946	236	236.5	235.5	Constant load
Goldsby & Kohlstedt (1997)	2.6e-05	3.38e-05	1.82e-05	2.47286267818702e-07	0.01	1.22039	236	236.5	235.5	Constant load
Goldsby & Kohlstedt (1997)	2.6e-05	3.38e-05	1.82e-05	4.82280830381647e-07	0.01	1.93241	236	236.5	235.5	Constant load
Goldsby & Kohlstedt (1997)	2.6e-05	3.38e-05	1.82e-05	9.06775964583904e-07	0.01	2.15179	236	236.5	235.5	Constant load
Goldsby & Kohlstedt (1997)	2.6e-05	3.38e-05	1.82e-05	9.06775964583904e-07	0.01	2.61096	236	236.5	235.5	Constant load
Goldsby & Kohlstedt (1997)	2.6e-05	3.38e-05	1.82e-05	9.74540741766307e-07	0.01	3.3243	236	236.5	235.5	Constant load
Goldsby & Kohlstedt (1997)	2.6e-05	3.38e-05	1.82e-05	1.43648137689049e-06	0.01	4.25991	236	236.5	235.5	Constant load
Goldsby & Kohlstedt (1997)	2.6e-05	3.38e-05	1.82e-05	2.30038220828702e-06	0.01	5.18681	236	236.5	235.5	Constant load
Goldsby & Kohlstedt (1997)	2.6e-05	3.38e-05	1.82e-05	3.71877583324936e-06	0.01	6.06736	236	236.5	235.5	Constant load
Goldsby & Kohlstedt (1997)	2.6e-05	3.38e-05	1.82e-05	9.56973694587658e-06	0.01	6.86594	236	236.5	235.5	Constant load
Goldsby & Kohlstedt (1997)	2.6e-05	3.38e-05	1.82e-05	1.17733485094014e-05	0.01	7.36207	236	236.5	235.5	Constant load
Goldsby & Kohlstedt (1997)	2.6e-05	3.38e-05	1.82e-05	1.54810352670893e-05	0.01	7.85416	236	236.5	235.5	Constant load
Goldsby & Kohlstedt (1997)	2.6e-05	3.38e-05	1.82e-05	1.78196840681642e-05	0.01	8.32339	236	236.5	235.5	Constant load
Goldsby & Kohlstedt (1997)	2.6e-05	3.38e-05	1.82e-05	2.50668637245364e-05	0.01	8.53886	236	236.5	235.5	Constant load
Goldsby & Kohlstedt (1997)	2.6e-05	3.38e-05	1.82e-05	3.79489706207635e-05	0.01	9.49074	236	236.5	235.5	Constant load
Goldsby & Kohlstedt (1997)	2.6e-05	3.38e-05	1.82e-05	5.84386264955661e-05	0.01	10.4304	236	236.5	235.5	Constant load
Goldsby & Kohlstedt (1997)	4e-05	5.2e-05	2.8e-05	3.87436024728002e-08	0.01	0.536785	236	236.5	235.5	Constant load
Goldsby & Kohlstedt (1997)	4e-05	5.2e-05	2.8e-05	4.27267638159979e-08	0.01	0.62273	236	236.5	235.5	Constant load
Goldsby & Kohlstedt (1997)	4e-05	5.2e-05	2.8e-05	1.09597336552381e-07	0.01	1.03395	236	236.5	235.5	Constant load
Goldsby & Kohlstedt (1997)	4e-05	5.2e-05	2.8e-05	1.89234361864498e-07	0.01	1.31099	236	236.5	235.5	Constant load
Goldsby & Kohlstedt (1997)	4e-05	5.2e-05	2.8e-05	2.17370197515712e-07	0.01	1.60066	236	236.5	235.5	Constant load
Goldsby & Kohlstedt (1997)	4e-05	5.2e-05	2.8e-05	6.42539750037302e-07	0.01	2.64606	236	236.5	235.5	Constant load
Goldsby & Kohlstedt (1997)	4e-05	5.2e-05	2.8e-05	1.16493045699045e-06	0.01	3.61327	236	236.5	235.5	Constant load
Goldsby & Kohlstedt (1997)	4e-05	5.2e-05	2.8e-05	1.92930104705785e-06	0.01	4.57826	236	236.5	235.5	Constant load
Goldsby & Kohlstedt (1997)	4e-05	5.2e-05	2.8e-05	2.99226463660819e-06	0.01	5.51061	236	236.5	235.5	Constant load
Goldsby & Kohlstedt (1997)	4e-05	5.2e-05	2.8e-05	5.17130317916962e-06	0.01	6.5268	236	236.5	235.5	Constant load
Goldsby & Kohlstedt (1997)	8.9e-05	0.0001157	6.23e-05	5.02573980109592e-08	0.01	1.47639	236	236.5	235.5	Constant load
Goldsby & Kohlstedt (1997)	8.9e-05	0.0001157	6.23e-05	6.61149996541045e-08	0.01	1.53993	236	236.5	235.5	Constant load
Goldsby & Kohlstedt (1997)	8.9e-05	0.0001157	6.23e-05	1.14974095058049e-07	0.01	2.13796	236	236.5	235.5	Constant load
Goldsby & Kohlstedt (1997)	8.9e-05	0.0001157	6.23e-05	1.51077573192499e-07	0.01	2.40049	236	236.5	235.5	Constant load
Goldsby & Kohlstedt (1997)	8.9e-05	0.0001157	6.23e-05	4.15432051241861e-07	0.01	3.25162	236	236.5	235.5	Constant load
Goldsby & Kohlstedt (1997)	8.9e-05	0.0001157	6.23e-05	9.52138223021403e-07	0.01	4.13238	236	236.5	235.5	Constant load
Goldsby & Kohlstedt (1997)	4e-06	5.2e-06	2.8e-06	6.25460661742488e-08	0.01	5.00611	193	193.5	192.5	Constant load
Goldsby & Kohlstedt (1997)	4e-06	5.2e-06	2.8e-06	6.24453350280502e-08	0.01	5.89658	193	193.5	192.5	Constant load
Goldsby & Kohlstedt (1997)	4e-06	5.2e-06	2.8e-06	1.27497009994371e-07	0.01	7.21772	193	193.5	192.5	Constant load
Goldsby & Kohlstedt (1997)	4e-06	5.2e-06	2.8e-06	1.8724058959868e-07	0.01	8.90635	193	193.5	192.5	Constant load
Goldsby & Kohlstedt (1997)	4e-06	5.2e-06	2.8e-06	2.84642667037422e-07	0.01	10.3562	193	193.5	192.5	Constant load
Goldsby & Kohlstedt (1997)	4e-06	5.2e-06	2.8e-06	3.90571005693757e-07	0.01	12.2264	193	193.5	192.5	Constant load
Goldsby & Kohlstedt (1997)	4e-06	5.2e-06	2.8e-06	6.42835718671385e-07	0.01	14.6184	193	193.5	192.5	Constant load
Goldsby & Kohlstedt (1997)	4e-06	5.2e-06	2.8e-06	6.5328095883039e-07	0.01	15.7797	193	193.5	192.5	Constant load
Goldsby & Kohlstedt (1997)	4e-06	5.2e-06	2.8e-06	7.91954078991278e-07	0.01	16.9668	193	193.5	192.5	Constant load
Goldsby & Kohlstedt (1997)	4e-06	5.2e-06	2.8e-06	1.05730430374218e-06	0.01	18.3527	193	193.5	192.5	Constant load
Goldsby & Kohlstedt (1997)	4e-06	5.2e-06	2.8e-06	8.59805066661175e-08	0.01	1.5787	208	208.5	207.5	Constant load
Goldsby & Kohlstedt (1997)	4e-06	5.2e-06	2.8e-06	2.91809885374184e-07	0.01	2.61879	208	208.5	207.5	Constant load
Goldsby & Kohlstedt (1997)	4e-06	5.2e-06	2.8e-06	8.22810831267932e-07	0.01	3.52533	208	208.5	207.5	Constant load
Goldsby & Kohlstedt (1997)	4e-06	5.2e-06	2.8e-06	8.79832499441866e-07	0.01	3.93459	208	208.5	207.5	Constant load
Goldsby & Kohlstedt (1997)	4e-06	5.2e-06	2.8e-06	1.91029306916366e-06	0.01	5.37279	208	208.5	207.5	Constant load
Goldsby & Kohlstedt (1997)	4e-06	5.2e-06	2.8e-06	2.34153147516931e-06	0.01	5.93745	208	208.5	207.5	Constant load
Goldsby & Kohlstedt (1997)	4e-06	5.2e-06	2.8e-06	2.60315483137418e-06	0.01	7.23103	208	208.5	207.5	Constant load
Goldsby & Kohlstedt (1997)	4e-06	5.2e-06	2.8e-06	4.2884465349682e-06	0.01	7.87952	208	208.5	207.5	Constant load
Jacka & Li (2000)	0.0017	0.00221	0.00119	1.56663289995916e-08	0.0141907	0.424264	268	268.5	267.5	Constant stress
Jacka & Li (2000)	0.0017	0.00221	0.00119	5.83926808166598e-09	0.0141907	0.424264	263	263.5	262.5	Constant stress
Jacka & Li (2000)	0.0017	0.00221	0.00119	1.01092746467626e-09	0.0428642	0.212132	258	258.5	257.5	Constant stress
Jacka & Li (2000)	0.0017	0.00221	0.00119	4.27263518170681e-09	0.0141907	0.424264	258	258.5	257.5	Constant stress
Jacka & Li (2000)	0.0017	0.00221	0.00119	1.02543244360963e-08	0.0141907	0.636396	258	258.5	257.5	Constant stress
Jacka & Li (2000)	0.0017	0.00221	0.00119	1.99389641812985e-08	0.0141907	0.848528	258	258.5	257.5	Constant stress
Jacka & Li (2000)	0.0017	0.00221	0.00119	4.84231987260105e-08	0.0141907	1.06066	258	258.5	257.5	Constant stress
Jacka & Li (2000)	0.0017	0.00221	0.00119	7.07649225273385e-10	0.0428642	0.212132	254	254.5	253.5	Constant stress
Jacka & Li (2000)	0.0017	0.00221	0.00119	1.56663289995916e-09	0.0141907	0.424264	254	254.5	253.5	Constant stress
Jacka & Li (2000)	0.0017	0.00221	0.00119	5.69684690894242e-09	0.0141907	0.636396	254	254.5	253.5	Constant stress
Jacka & Li (2000)	0.0017	0.00221	0.00119	1.26754843723969e-08	0.0141907	0.848528	254	254.5	253.5	Constant stress
Jacka & Li (2000)	0.0017	0.00221	0.00119	1.11088514724377e-07	0.0141907	1.69706	254	254.5	253.5	Constant stress
Jacka & Li (2000)	0.0017	0.00221	0.00119	1.03981110652416e-09	0.0428642	0.424264	252	252.5	251.5	Constant stress
Jacka & Li (2000)	0.0017	0.00221	0.00119	1.56663289995916e-08	0.0141907	1.16673	252	252.5	251.5	Constant stress
Jacka & Li (2000)	0.0017	0.00221	0.00119	5.98168925438954e-10	0.0141907	1.16673	228	228.5	227.5	Constant stress
Piazolo et al. (2013)	0.000495	0.0006435	0.0003465	6.10749185667752e-07	0.0177567	1.22	266	266.5	265.5	Constant displacement rate
Montagnat et al (2015)	0.00105067	0.00119794	0.00087905	7.65656565656566e-08	0.0100503	0.7	268	268.5	267.5	Constant load
Montagnat et al (2015)	0.00105067	0.00119794	0.00087905	9.84848484848485e-08	0.0100503	0.8	268	268.5	267.5	Constant load
Montagnat et al (2015)	0.00105067	0.00119794	0.00087905	9.47613268608414e-08	0.0112632	0.75	268	268.5	267.5	Constant load
Montagnat et al (2015)	0.00105067	0.00119794	0.00087905	8.21641263752902e-08	0.00934352	0.7	268	268.5	267.5	Constant load
Montagnat et al (2015)	0.00105067	0.00119794	0.00087905	1.62216624685139e-07	0.00752827	0.8	268	268.5	267.5	Constant load
Vaughan et al. (2017)	0.000343	0.0004459	0.0002401	1.01010101010101e-06	0.0100503	1.12	268.4	268.9	267.9	Constant displacement rate
Vaughan et al. (2017)	0.000343	0.0004459	0.0002401	1.00806451612903e-06	0.00803217	1.13	268.4	268.9	267.9	Constant displacement rate
Vaughan et al. (2017)	0.000343	0.0004459	0.0002401	1.10619469026549e-06	0.100926	1.22	268.04	268.54	267.54	Constant displacement rate
Vaughan et al. (2017)	0.000343	0.0004459	0.0002401	1.09529025191676e-06	0.0910194	1.17	268.02	268.52	267.52	Constant displacement rate
Vaughan et al. (2017)	0.000343	0.0004459	0.0002401	1.09289617486339e-06	0.0888312	1.2	268.17	268.67	267.67	Constant displacement rate
Qi et al. (2017)	0.00023	0.000299	0.000161	2.16e-06	0.0223	1.85	263.7	264.2	263.2	Constant displacement rate
Qi et al. (2017)	0.00023	0.000299	0.000161	0.000202	0.0258	8.09	263.3	263.8	262.8	Constant displacement rate
Qi et al. (2017)	0.00023	0.000299	0.000161	1.14e-05	0.0208	3.3	263.3	263.8	262.8	Constant displacement rate
Qi et al. (2017)	0.00023	0.000299	0.000161	4.6e-05	0.0229	5.42	263.2	263.7	262.7	Constant displacement rate
Qi et al. (2017)	0.00063	0.000819	0.000441	1.2e-06	0.0157	2.23	263.5	264	263	Constant displacement rate
Qi et al. (2017)	0.00063	0.000819	0.000441	3.81e-05	0.0146	6.17	263.4	263.9	262.9	Constant displacement rate
Qi et al. (2017)	0.00063	0.000819	0.000441	8.24e-05	0.0157	7.61	263.7	264.2	263.2	Constant displacement rate
Qi et al. (2017)	0.00063	0.000819	0.000441	1.02e-05	0.0174	4.01	263.7	264.2	263.2	Constant displacement rate
Qi et al. (2019)	0.00023	0.000299	0.000161	4.60725514813321e-05	0.0404145	1.50688	267.6	268.1	267.1	Constant displacement rate
Qi et al. (2019)	0.00023	0.000299	0.000161	6.23538290724796e-05	0.0750555	2.42487	267.4	267.9	266.9	Constant displacement rate
Qi et al. (2019)	0.00023	0.000299	0.000161	0.000102768	0.0519615	2.66736	267.4	267.9	266.9	Constant displacement rate
Qi et al. (2019)	0.00023	0.000299	0.000161	7.90969868789788e-05	0.057735	3.49874	267.8	268.3	267.3	Constant displacement rate
Qi et al. (2019)	0.00023	0.000299	0.000161	7.21687836487032e-05	0.092376	12.1763	242.5	243	242	Constant displacement rate
Qi et al. (2019)	0.00023	0.000299	0.000161	7.39008344562721e-05	0.092376	11.6567	243.1	243.6	242.6	Constant displacement rate
Qi et al. (2019)	0.00023	0.000299	0.000161	8.42931393016854e-05	0.057735	11.7953	242.4	242.9	241.9	Constant displacement rate
Qi et al. (2019)	0.00023	0.000299	0.000161	6.87046820335655e-05	0.0750555	7.96743	252.6	253.1	252.1	Constant displacement rate
Qi et al. (2019)	0.00023	0.000299	0.000161	5.47905405460955e-05	0.0288675	8.31384	252.9	253.4	252.4	Constant displacement rate
Fan et al. (2020)	0.000291	0.0003783	0.0002037	1.03e-05	0.02	1.78	263	263.5	262.5	Constant displacement rate
Fan et al. (2020)	0.000291	0.0003783	0.0002037	1.03e-05	0.01	2.92	263	263.5	262.5	Constant displacement rate
Fan et al. (2020)	0.000291	0.0003783	0.0002037	1.11e-05	0.02	2.54	263	263.5	262.5	Constant displacement rate
Fan et al. (2020)	0.000291	0.0003783	0.0002037	1.11e-05	0.03	2.85	263	263.5	262.5	Constant displacement rate
Fan et al. (2020)	0.000291	0.0003783	0.0002037	1.03e-05	0.02	2.13	263	263.5	262.5	Constant displacement rate
Fan et al. (2020)	0.000291	0.0003783	0.0002037	1.03e-05	0.02	4.33	253	253.5	252.5	Constant displacement rate
Fan et al. (2020)	0.000291	0.0003783	0.0002037	8.09e-06	0.02	4.88	253	253.5	252.5	Constant displacement rate
Fan et al. (2020)	0.000291	0.0003783	0.0002037	1.13e-05	0.04	3.64	253	253.5	252.5	Constant displacement rate
Fan et al. (2020)	0.000291	0.0003783	0.0002037	1.09e-05	0.03	4.69	253	253.5	252.5	Constant displacement rate
Fan et al. (2020)	0.000291	0.0003783	0.0002037	1.1e-05	0.03	4.66	253	253.5	252.5	Constant displacement rate
Fan et al. (2020)	0.000291	0.0003783	0.0002037	1.08e-05	0.03	8.24	243	243.5	242.5	Constant displacement rate
Fan et al. (2020)	0.000291	0.0003783	0.0002037	1.07e-05	0.03	8.71	243	243.5	242.5	Constant displacement rate
Fan et al. (2020)	0.000291	0.0003783	0.0002037	1.03e-05	0.03	8.93	243	243.5	242.5	Constant displacement rate
Fan et al. (2020)	0.000291	0.0003783	0.0002037	1.11e-05	0.03	7.6	243	243.5	242.5	Constant displacement rate
Fan et al. (2020)	0.000291	0.0003783	0.0002037	1.1e-05	0.02	7.82	243	243.5	242.5	Constant displacement rate
Fan et al. (2021a)	0.000545	0.0007085	0.0003815	1.11e-06	0.01	1.02	269	269.5	268.5	Constant load
Fan et al. (2021a)	0.000545	0.0007085	0.0003815	7.6e-07	0.02	1.01	269	269.5	268.5	Constant load
Fan et al. (2021a)	0.000545	0.0007085	0.0003815	6.54e-07	0.02	1.01	269	269.5	268.5	Constant load
Fan et al. (2021a)	0.000545	0.0007085	0.0003815	9.74e-07	0.02	1.01	269	269.5	268.5	Constant load
Fan et al. (2021a)	0.000545	0.0007085	0.0003815	9.43e-07	0.02	1.01	269	269.5	268.5	Constant load
Fan et al. (2021a)	0.000545	0.0007085	0.0003815	8.44e-07	0.02	1.01	269	269.5	268.5	Constant load
Fan et al. (2021a)	0.000545	0.0007085	0.0003815	8.41e-07	0.02	1.01	269	269.5	268.5	Constant load
Unpublished	0.000291	0.0003783	0.0002037	2.8e-05	0.0246	8.44	243	243.5	242.5	Constant displacement rate
Unpublished	0.000291	0.0003783	0.0002037	2.8e-05	0.0241	8.8	243	243.5	242.5	Constant displacement rate
Unpublished	0.000291	0.0003783	0.0002037	2.7e-05	0.0266	9.09	243	243.5	242.5	Constant displacement rate
Unpublished	0.000291	0.0003783	0.0002037	5.6e-05	0.0289	10.92	243	243.5	242.5	Constant displacement rate
Fan et al. (2021a, 2021b)	0.000291	0.0003783	0.0002037	5.4e-05	0.0274	11.29	243	243.5	242.5	Constant displacement rate
Fan et al. (2021a, 2021b)	0.000291	0.0003783	0.0002037	5.4e-05	0.0298	10.63	243	243.5	242.5	Constant displacement rate
Fan et al. (2021c)	0.001293	0.0016809	0.0009051	1e-05	0.018	8.82	243	243.5	242.5	Constant displacement rate
Fan et al. (2021c)	0.001293	0.0016809	0.0009051	1.1e-05	0.0152	8.27	243	243.5	242.5	Constant displacement rate
Fan et al. (2021c)	0.001293	0.0016809	0.0009051	1.1e-05	0.0326	8.98	243	243.5	242.5	Constant displacement rate
Fan et al. (2021c)	0.001293	0.0016809	0.0009051	2.8e-05	0.0186	10.54	243	243.5	242.5	Constant displacement rate
Fan et al. (2021c)	0.001293	0.0016809	0.0009051	2.8e-05	0.0226	10.78	243	243.5	242.5	Constant displacement rate
Fan et al. (2021c)	0.001293	0.0016809	0.0009051	2.6e-05	0.0239	10.3	243	243.5	242.5	Constant displacement rate
Fan et al. (2021c)	0.001293	0.0016809	0.0009051	5.4e-05	0.0189	12.37	243	243.5	242.5	Constant displacement rate
Fan et al. (2021c)	0.001293	0.0016809	0.0009051	5.6e-05	0.0257	12.1	243	243.5	242.5	Constant displacement rate
Fan et al. (2021c)	0.001293	0.0016809	0.0009051	5.4e-05	0.0226	12.83	243	243.5	242.5	Constant displacement rate
Qi & Goldsby (2021)	0.00023	0.000299	0.000161	4e-05	0.02	4.95	263.4	263.9	262.9	Constant displacement rate
Qi & Goldsby (2021)	0.00023	0.000299	0.000161	0.000457	0.02	8.96	263.4	263.9	262.9	Constant displacement rate
Qi & Goldsby (2021)	0.00023	0.000299	0.000161	0.000103	0.02	6.84	263.4	263.9	262.9	Constant displacement rate
Qi & Goldsby (2021)	0.00023	0.000299	0.000161	0.000159	0.02	7.19	263.4	263.9	262.9	Constant displacement rate
Qi & Goldsby (2021)	0.00023	0.000299	0.000161	3.49e-05	0.02	4.94	263.4	263.9	262.9	Constant displacement rate
Qi & Goldsby (2021)	0.00023	0.000299	0.000161	0.000326	0.02	9.12	263.4	263.9	262.9	Constant displacement rate
Qi & Goldsby (2021)	0.00023	0.000299	0.000161	9.55e-05	0.02	6.25	263.4	263.9	262.9	Constant displacement rate
Qi & Goldsby (2021)	0.00023	0.000299	0.000161	0.000169	0.02	8.03	263.4	263.9	262.9	Constant displacement rate
Qi & Goldsby (2021)	0.00023	0.000299	0.000161	4e-04	0.02	9.83	263.4	263.9	262.9	Constant displacement rate
Qi & Goldsby (2021)	0.00023	0.000299	0.000161	9.59e-05	0.02	7.11	263.4	263.9	262.9	Constant displacement rate
Qi & Goldsby (2021)	0.00023	0.000299	0.000161	0.000314	0.02	9.44	263.4	263.9	262.9	Constant displacement rate
Qi & Goldsby (2021)	0.00023	0.000299	0.000161	0.000489	0.02	10.45	263.4	263.9	262.9	Constant displacement rate
Qi & Goldsby (2021)	0.00023	0.000299	0.000161	8e-05	0.02	6.32	263.4	263.9	262.9	Constant displacement rate
Qi & Goldsby (2021)	0.00023	0.000299	0.000161	2.53e-05	0.02	4.49	263.4	263.9	262.9	Constant displacement rate
Qi & Goldsby (2021)	0.00023	0.000299	0.000161	3.95e-05	0.02	4.87	263.4	263.9	262.9	Constant displacement rate
Qi & Goldsby (2021)	0.00023	0.000299	0.000161	6e-05	0.02	6.36	263.4	263.9	262.9	Constant displacement rate
Qi & Goldsby (2021)	0.00063	0.000819	0.000441	0.000352	0.02	10.89	263.4	263.9	262.9	Constant displacement rate
Qi & Goldsby (2021)	0.00063	0.000819	0.000441	3.1e-05	0.02	5.57	263.4	263.9	262.9	Constant displacement rate
Qi & Goldsby (2021)	0.00063	0.000819	0.000441	3.1e-05	0.02	5.57	263.4	263.9	262.9	Constant displacement rate
Qi & Goldsby (2021)	0.00063	0.000819	0.000441	3.1e-05	0.02	5.57	263.4	263.9	262.9	Constant displacement rate
Qi & Goldsby (2021)	0.00063	0.000819	0.000441	3.1e-05	0.02	5.57	263.4	263.9	262.9	Constant displacement rate
Qi & Goldsby (2021)	0.00063	0.000819	0.000441	3.1e-05	0.02	5.57	263.4	263.9	262.9	Constant displacement rate
Qi & Goldsby (2021)	0.00063	0.000819	0.000441	3.1e-05	0.02	5.57	263.4	263.9	262.9	Constant displacement rate
Qi & Goldsby (2021)	0.00063	0.000819	0.000441	3.1e-05	0.02	5.57	263.4	263.9	262.9	Constant displacement rate
Qi & Goldsby (2021)	0.00063	0.000819	0.000441	3.1e-05	0.02	5.57	263.4	263.9	262.9	Constant displacement rate
Qi & Goldsby (2021)	0.00063	0.000819	0.000441	3.1e-05	0.02	5.57	263.4	263.9	262.9	Constant displacement rate
Qi & Goldsby (2021)	0.00063	0.000819	0.000441	3.1e-05	0.02	5.57	263.4	263.9	262.9	Constant displacement rate
Qi & Goldsby (2021)	0.00063	0.000819	0.000441	3.1e-05	0.02	5.57	263.4	263.9	262.9	Constant displacement rate
Qi & Goldsby (2021)	0.00063	0.000819	0.000441	3.1e-05	0.02	5.57	263.4	263.9	262.9	Constant displacement rate
Qi & Goldsby (2021)	0.00063	0.000819	0.000441	3.1e-05	0.02	5.57	263.4	263.9	262.9	Constant displacement rate
Qi & Goldsby (2021)	0.00063	0.000819	0.000441	3.1e-05	0.02	5.57	263.4	263.9	262.9	Constant displacement rate
Qi & Goldsby (2021)	0.00063	0.000819	0.000441	3.1e-05	0.02	5.57	263.4	263.9	262.9	Constant displacement rate
Qi & Goldsby (2021)	0.00063	0.000819	0.000441	3.1e-05	0.02	5.57	263.4	263.9	262.9	Constant displacement rate
Qi & Goldsby (2021)	0.00063	0.000819	0.000441	3.1e-05	0.02	5.57	263.4	263.9	262.9	Constant displacement rate
Qi & Goldsby (2021)	0.00063	0.000819	0.000441	3.1e-05	0.02	5.57	263.4	263.9	262.9	Constant displacement rate
Qi & Goldsby (2021)	0.00063	0.000819	0.000441	3.1e-05	0.02	5.57	263.4	263.9	262.9	Constant displacement rate
Qi & Goldsby (2021)	0.00063	0.000819	0.000441	3.1e-05	0.02	5.57	263.4	263.9	262.9	Constant displacement rate
Qi & Goldsby (2021)	0.00063	0.000819	0.000441	3.1e-05	0.02	5.57	263.4	263.9	262.9	Constant displacement rate
Qi & Goldsby (2021)	0.00063	0.000819	0.000441	3.1e-05	0.02	5.57	263.4	263.9	262.9	Constant displacement rate
Qi & Goldsby (2021)	0.00063	0.000819	0.000441	3.1e-05	0.02	5.57	263.4	263.9	262.9	Constant displacement rate
Qi & Goldsby (2021)	0.00063	0.000819	0.000441	3.1e-05	0.02	5.57	263.4	263.9	262.9	Constant displacement rate
Qi & Goldsby (2021)	0.00063	0.000819	0.000441	3.1e-05	0.02	5.57	263.4	263.9	262.9	Constant displacement rate
Qi & Goldsby (2021)	0.00063	0.000819	0.000441	3.1e-05	0.02	5.57	263.4	263.9	262.9	Constant displacement rate
Qi & Goldsby (2021)	0.00063	0.000819	0.000441	3.1e-05	0.02	5.57	263.4	263.9	262.9	Constant displacement rate
Qi & Goldsby (2021)	0.00063	0.000819	0.000441	3.1e-05	0.02	5.57	263.4	263.9	262.9	Constant displacement rate
Qi & Goldsby (2021)	0.00063	0.000819	0.000441	3.1e-05	0.02	5.57	263.4	263.9	262.9	Constant displacement rate
Qi & Goldsby (2021)	0.00063	0.000819	0.000441	3.1e-05	0.02	5.57	263.4	263.9	262.9	Constant displacement rate
Qi & Goldsby (2021)	0.00063	0.000819	0.000441	3.1e-05	0.02	5.57	263.4	263.9	262.9	Constant displacement rate
Qi & Goldsby (2021)	0.00063	0.000819	0.000441	3.1e-05	0.02	5.57	263.4	263.9	262.9	Constant displacement rate
Qi & Goldsby (2021)	0.00063	0.000819	0.000441	3.1e-05	0.02	5.57	263.4	263.9	262.9	Constant displacement rate
Qi & Goldsby (2021)	0.00063	0.000819	0.000441	3.1e-05	0.02	5.57	263.4	263.9	262.9	Constant displacement rate
Qi & Goldsby (2021)	0.00063	0.000819	0.000441	3.1e-05	0.02	5.57	263.4	263.9	262.9	Constant displacement rate
Qi & Goldsby (2021)	0.00063	0.000819	0.000441	3.1e-05	0.02	5.57	263.4	263.9	262.9	Constant displacement rate
Qi & Goldsby (2021)	0.00063	0.000819	0.000441	3.1e-05	0.02	5.57	263.4	263.9	262.9	Constant displacement rate
Qi & Goldsby (2021)	0.00063	0.000819	0.000441	3.1e-05	0.02	5.57	263.4	263.9	262.9	Constant displacement rate
Qi & Goldsby (2021)	0.00063	0.000819	0.000441	3.1e-05	0.02	5.57	263.4	263.9	262.9	Constant displacement rate
Qi & Goldsby (2021)	0.00063	0.000819	0.000441	3.1e-05	0.02	5.57	263.4	263.9	262.9	Constant displacement rate
Qi & Goldsby (2021)	0.00063	0.000819	0.000441	3.1e-05	0.02	5.57	263.4	263.9	262.9	Constant displacement rate
Qi & Goldsby (2021)	0.00063	0.000819	0.000441	3.1e-05	0.02	5.57	263.4	263.9	262.9	Constant displacement rate
Qi & Goldsby (2021)	0.00063	0.000819	0.000441	3.1e-05	0.02	5.57	263.4	263.9	262.9	Constant displacement rate
Qi & Goldsby (2021)	0.00063	0.000819	0.000441	3.1e-05	0.02	5.57	263.4	263.9	262.9	Constant displacement rate
Qi & Goldsby (2021)	0.00063	0.000819	0.000441	3.1e-05	0.02	5.57	263.4	263.9	262.9	Constant displacement rate
Qi & Goldsby (2021)	0.00063	0.000819	0.000441	3.1e-05	0.02	5.57	263.4	263.9	262.9	Constant displacement rate
Qi & Goldsby (2021)	0.00063	0.000819	0.000441	3.1e-05	0.02	5.57	263.4	263.9	262.9	Constant displacement rate
Qi & Goldsby (2021)	0.00063	0.000819	0.000441	3.1e-05	0.02	5.57	263.4	263.9	262.9	Constant displacement rate
Qi & Goldsby (2021)	0.00063	0.000819	0.000441	3.1e-05	0.02	5.57	263.4	263.9	262.9	Constant displacement rate

## Sheet: Supplementary Table 3
Source	GS_ini_mean	GS_ini_upper	GS_ini_lower	rate_c	strain_c	stress_c	T_mean	T_upper	T_lower	exp_type
Durham et al. (1983)	0.0015	0.00195	0.00105	0.00035	0.15	12.8	243	243.5	242.5	Constant displacement rate
Durham et al. (1983)	0.0015	0.00195	0.00105	0.00035	0.15	11.9	243	243.5	242.5	Constant displacement rate
Durham et al. (1983)	0.0015	0.00195	0.00105	3.5e-06	0.15	4.1	244	244.5	243.5	Constant displacement rate
Durham et al. (1983)	0.0015	0.00195	0.00105	0.00035	0.15	12.9	244	244.5	243.5	Constant displacement rate
Durham et al. (1983)	0.0015	0.00195	0.00105	3.5e-05	0.15	6.6	244	244.5	243.5	Constant displacement rate
Durham et al. (1983)	0.0015	0.00195	0.00105	3.5e-05	0.15	7.1	244	244.5	243.5	Constant displacement rate
Durham et al. (1983)	0.0015	0.00195	0.00105	0.00035	0.15	7	258	258.5	257.5	Constant displacement rate
Durham et al. (1983)	0.0015	0.00195	0.00105	0.00035	0.15	6.5	258	258.5	257.5	Constant displacement rate
Durham et al. (1983)	0.0015	0.00195	0.00105	3.5e-05	0.15	3.7	258	258.5	257.5	Constant displacement rate
Durham et al. (1983)	0.0015	0.00195	0.00105	0.00035	0.15	6.9	258	258.5	257.5	Constant displacement rate
Durham et al. (1983)	0.0015	0.00195	0.00105	0.00035	0.15	5.8	258	258.5	257.5	Constant displacement rate
Jacka (1984b)	0.0045	0.00585	0.00315	1.05916930230999e-07	0.113342	0.636396	266	266.5	265.5	Constant load
Jacka (1984b)	0.004	0.0052	0.0028	1.22591431201643e-07	0.0910958	0.636396	266	266.5	265.5	Constant load
Jacka (1984b)	0.0025	0.00325	0.00175	2.10497336304616e-07	0.131315	0.636396	266	266.5	265.5	Constant load
Jacka (1984b)	0.0022	0.00286	0.00154	1.19550592681668e-07	0.146399	0.636396	266	266.5	265.5	Constant load
Jacka (1984b)	0.0015	0.00195	0.00105	1.05986724225456e-07	0.114835	0.636396	266	266.5	265.5	Constant load
Jacka (1984b)	0.0045	0.00585	0.00315	3.28409568022538e-08	0.114835	0.551543	263	263.5	262.5	Constant load
Jacka (1984b)	0.004	0.0052	0.0028	3.27328007573518e-08	0.107388	0.551543	263	263.5	262.5	Constant load
Jacka (1984b)	0.0022	0.00286	0.00154	2.42127782646416e-08	0.146399	0.551543	263	263.5	262.5	Constant load
Jacka (1984b)	0.0015	0.00195	0.00105	2.26994796231015e-08	0.146399	0.551543	263	263.5	262.5	Constant load
Jacka (1984b)	0.0045	0.00585	0.00315	5.56314388805057e-07	0.131315	1.06066	264	264.5	263.5	Constant load
Jacka (1984b)	0.0025	0.00325	0.00175	3.78324660385025e-07	0.146399	1.06066	264	264.5	263.5	Constant load
Jacka (1984b)	0.0022	0.00286	0.00154	3.60852576522199e-07	0.131315	1.06066	264	264.5	263.5	Constant load
Jacka (1984b)	0.0015	0.00195	0.00105	6.01420960870332e-07	0.131315	1.06066	264	264.5	263.5	Constant load
Jacka & Maccagnan (1984)	0.0022	0.00286	0.00154	5.97e-08	0.33	0.2	270	270.5	269.5	Constant stress
Gao & Jacka (1987)	7e-04	0.00091	0.00049	5.11823293726589e-08	0.147913	0.424264	269.7	270.2	269.2	Constant stress
Jacka & Li (1994)	0.00123608	0.00140935	0.00103418	7e-09	0.15	0.2	263	263.5	262.5	Constant stress
Jacka & Li (1994)	0.00123608	0.00140935	0.00103418	4.8e-08	0.15	0.3	263	263.5	262.5	Constant stress
Jacka & Li (1994)	0.00123608	0.00140935	0.00103418	9.8e-08	0.15	0.4	263	263.5	262.5	Constant stress
Jacka & Li (1994)	0.00123608	0.00140935	0.00103418	2e-07	0.15	0.5	263	263.5	262.5	Constant stress
Jacka & Li (1994)	0.00123608	0.00140935	0.00103418	3.8e-07	0.15	0.6	263	263.5	262.5	Constant stress
Jacka & Li (1994)	0.0027175	0.00309842	0.00227362	2.9e-08	0.15	0.3	263	263.5	262.5	Constant stress
Jacka & Li (1994)	0.0027175	0.00309842	0.00227362	7.2e-08	0.15	0.4	263	263.5	262.5	Constant stress
Jacka & Li (1994)	0.0027175	0.00309842	0.00227362	3.5e-08	0.15	0.6	263	263.5	262.5	Constant stress
Jacka & Li (1994)	0.0027175	0.00309842	0.00227362	1.1e-08	0.15	0.8	263	263.5	262.5	Constant stress
Jacka & Li (1994)	0.0027175	0.00309842	0.00227362	3.6e-08	0.15	1	263	263.5	262.5	Constant stress
Jacka & Li (1994)	0.00123608	0.00140935	0.00103418	6e-08	0.15	0.2	268	268.5	267.5	Constant stress
Jacka & Li (1994)	0.00123608	0.00140935	0.00103418	3.3e-07	0.15	0.4	268	268.5	267.5	Constant stress
Jacka & Li (1994)	0.00123608	0.00140935	0.00103418	1.4e-06	0.15	0.6	268	268.5	267.5	Constant stress
Jacka & Li (1994)	0.00123608	0.00140935	0.00103418	5.6e-06	0.15	0.8	268	268.5	267.5	Constant stress
Jacka & Li (1994)	0.00123608	0.00140935	0.00103418	1.3e-05	0.15	1	268	268.5	267.5	Constant stress
Jacka & Li (1994)	0.00159577	0.00181946	0.00133512	6.67e-08	0.15	0.25	268	268.5	267.5	Constant stress
Jacka & Li (1994)	0.00159577	0.00181946	0.00133512	6.42e-08	0.15	0.25	268	268.5	267.5	Constant stress
Jacka & Li (1994)	0.00159577	0.00181946	0.00133512	6.79e-08	0.15	0.25	268	268.5	267.5	Constant stress
Jacka & Li (1994)	0.00123608	0.00140935	0.00103418	1.1e-07	0.15	0.2	270	270.5	269.5	Constant stress
Jacka & Li (1994)	0.00123608	0.00140935	0.00103418	2.2e-07	0.15	0.3	270	270.5	269.5	Constant stress
Jacka & Li (1994)	0.00123608	0.00140935	0.00103418	6.4e-07	0.15	0.4	270	270.5	269.5	Constant stress
Jacka & Li (1994)	0.00123608	0.00140935	0.00103418	1.1e-06	0.15	0.5	270	270.5	269.5	Constant stress
Jacka & Li (1994)	0.00123608	0.00140935	0.00103418	2.6e-06	0.15	0.6	270	270.5	269.5	Constant stress
Jacka & Li (1994)	0.00123608	0.00140935	0.00103418	8.8e-06	0.15	0.8	270	270.5	269.5	Constant stress
Jacka & Li (2000)	0.0017	0.00221	0.00119	5.14521538123634e-08	0.146399	0.424264	268	268.5	267.5	Constant stress
Jacka & Li (2000)	0.0017	0.00221	0.00119	9.98777103416467e-09	0.146399	0.424264	263	263.5	262.5	Constant stress
Jacka & Li (2000)	0.0017	0.00221	0.00119	5.02585137293849e-09	0.16158	0.424264	258	258.5	257.5	Constant stress
Jacka & Li (2000)	0.0017	0.00221	0.00119	2.11861809815614e-08	0.146399	0.636396	258	258.5	257.5	Constant stress
Jacka & Li (2000)	0.0017	0.00221	0.00119	5.48274695229654e-08	0.16158	0.848528	258	258.5	257.5	Constant stress
Jacka & Li (2000)	0.0017	0.00221	0.00119	1.14223894839511e-07	0.16158	1.06066	258	258.5	257.5	Constant stress
Jacka & Li (2000)	0.0017	0.00221	0.00119	1.92908938109367e-09	0.10145	0.424264	254	254.5	253.5	Constant stress
Jacka & Li (2000)	0.0017	0.00221	0.00119	1.03102361647217e-08	0.150943	0.636396	254	254.5	253.5	Constant stress
Jacka & Li (2000)	0.0017	0.00221	0.00119	2.72393755477218e-08	0.146399	0.848528	254	254.5	253.5	Constant stress
Jacka & Li (2000)	0.0017	0.00221	0.00119	3.18811465326174e-07	0.153977	1.06066	254	254.5	253.5	Constant stress
Jacka & Li (2000)	0.0017	0.00221	0.00119	3.48728576159706e-08	0.150943	1.16673	252	252.5	251.5	Constant stress
Piazolo et al. (2013)	0.000495	0.0006435	0.0003465	6.66666666666667e-07	0.105361	0.99	266	266.5	265.5	Constant displacement rate
Montagnat et al (2015)	0.00105067	0.00119794	0.00087905	4.4124218051832e-07	0.110708	0.75	268	268.5	267.5	Constant load
Montagnat et al (2015)	0.00105067	0.00119794	0.00087905	5.12336074683263e-07	0.105583	0.7	268	268.5	267.5	Constant load
Montagnat et al (2015)	0.00105067	0.00119794	0.00087905	6.47570218457423e-07	0.108476	0.8	268	268.5	267.5	Constant load
Qi et al. (2017)	0.00023	0.000299	0.000161	2.31e-06	0.21	1.3	263.7	264.2	263.2	Constant displacement rate
Qi et al. (2017)	0.00023	0.000299	0.000161	0.000242	0.22	4.31	263.3	263.8	262.8	Constant displacement rate
Qi et al. (2017)	0.00023	0.000299	0.000161	1.35e-05	0.13	2.18	263.3	263.8	262.8	Constant displacement rate
Qi et al. (2017)	0.00023	0.000299	0.000161	5.02e-05	0.19	3.02	263.2	263.7	262.7	Constant displacement rate
Qi et al. (2017)	0.00063	0.000819	0.000441	1.18e-06	0.18	1.17	263.5	264	263	Constant displacement rate
Qi et al. (2017)	0.00063	0.000819	0.000441	4.4e-05	0.23	2.94	263.4	263.9	262.9	Constant displacement rate
Qi et al. (2017)	0.00063	0.000819	0.000441	9.05e-05	0.23	3.49	263.7	264.2	263.2	Constant displacement rate
Qi et al. (2017)	0.00063	0.000819	0.000441	1.13e-05	0.23	1.94	263.7	264.2	263.2	Constant displacement rate
Qi et al. (2019)	0.00023	0.000299	0.000161	7.90969868789788e-05	0.866025	2.30363	267.8	268.3	267.3	Constant displacement rate
Qi et al. (2019)	0.00023	0.000299	0.000161	7.21687836487032e-05	1.50111	9.52628	242.5	243	242	Constant displacement rate
Qi et al. (2019)	0.00023	0.000299	0.000161	7.39008344562721e-05	0.80829	8.48705	243.1	243.6	242.6	Constant displacement rate
Qi et al. (2019)	0.00023	0.000299	0.000161	6.87046820335655e-05	1.27017	4.67654	252.6	253.1	252.1	Constant displacement rate
Qi et al. (2019)	0.00023	0.000299	0.000161	5.47905405460955e-05	0.635085	4.46869	252.9	253.4	252.4	Constant displacement rate
Fan et al. (2020)	0.000291	0.0003783	0.0002037	1.22e-05	0.19	1.33	263	263.5	262.5	Constant displacement rate
Fan et al. (2020)	0.000291	0.0003783	0.0002037	1.28e-05	0.2	2.93	253	253.5	252.5	Constant displacement rate
Fan et al. (2020)	0.000291	0.0003783	0.0002037	1.31e-05	0.21	5	243	243.5	242.5	Constant displacement rate
Fan et al. (2021a)	0.000545	0.0007085	0.0003815	1.22e-06	0.13	0.9	269	269.5	268.5	Constant load
Fan et al. (2021a)	0.000545	0.0007085	0.0003815	1.58e-06	0.13	0.9	269	269.5	268.5	Constant load
Fan et al. (2021a)	0.000545	0.0007085	0.0003815	1.67e-06	0.13	0.9	269	269.5	268.5	Constant load
Fan et al. (2021a)	0.000545	0.0007085	0.0003815	1.48e-06	0.13	0.9	269	269.5	268.5	Constant load
Fan et al. (2021a)	0.000545	0.0007085	0.0003815	1.57e-06	0.13	0.9	269	269.5	268.5	Constant load
Unpublished	0.000291	0.0003783	0.0002037	3.3e-05	0.2298	5.42	243	243.5	242.5	Constant displacement rate
Fan et al. (2021a, 2021b)	0.000291	0.0003783	0.0002037	6.7e-05	0.2403	7.35	243	243.5	242.5	Constant displacement rate
Fan et al. (2021c)	0.001293	0.0016809	0.0009051	1.2e-05	0.1	5.13	243	243.5	242.5	Constant displacement rate
Fan et al. (2021c)	0.001293	0.0016809	0.0009051	1.3e-05	0.2263	4.67	243	243.5	242.5	Constant displacement rate
Fan et al. (2021c)	0.001293	0.0016809	0.0009051	3e-05	0.1	6.27	243	243.5	242.5	Constant displacement rate
Fan et al. (2021c)	0.001293	0.0016809	0.0009051	3.2e-05	0.2282	5.87	243	243.5	242.5	Constant displacement rate
Fan et al. (2021c)	0.001293	0.0016809	0.0009051	6e-05	0.1	7.03	243	243.5	242.5	Constant displacement rate
Fan et al. (2021c)	0.001293	0.0016809	0.0009051	6.6e-05	0.2325	7.65	243	243.5	242.5	Constant displacement rate
Qi & Goldsby (2021)	0.00023	0.000299	0.000161	4.03e-05	0.2	3.1	263.4	263.9	262.9	Constant displacement rate
Qi & Goldsby (2021)	0.00023	0.000299	0.000161	0.000471	0.25	4.9	263.4	263.9	262.9	Constant displacement rate
Qi & Goldsby (2021)	0.00023	0.000299	0.000161	0.000105	0.18	3.85	263.4	263.9	262.9	Constant displacement rate
Qi & Goldsby (2021)	0.00023	0.000299	0.000161	0.000176	0.26	4.04	263.4	263.9	262.9	Constant displacement rate
Qi & Goldsby (2021)	0.00023	0.000299	0.000161	4.54e-05	0.19	2.84	263.4	263.9	262.9	Constant displacement rate
Qi & Goldsby (2021)	0.00023	0.000299	0.000161	0.000328	0.19	4.75	263.4	263.9	262.9	Constant displacement rate
Qi & Goldsby (2021)	0.00023	0.000299	0.000161	0.000107	0.24	3.29	263.4	263.9	262.9	Constant displacement rate
Qi & Goldsby (2021)	0.00023	0.000299	0.000161	0.000176	0.22	3.88	263.4	263.9	262.9	Constant displacement rate
Qi & Goldsby (2021)	0.00023	0.000299	0.000161	0.000427	0.22	4.85	263.4	263.9	262.9	Constant displacement rate
Qi & Goldsby (2021)	0.00023	0.000299	0.000161	9.17e-05	0.15	3.73	263.4	263.9	262.9	Constant displacement rate
Qi & Goldsby (2021)	0.00023	0.000299	0.000161	0.000327	0.2	4.64	263.4	263.9	262.9	Constant displacement rate
Qi & Goldsby (2021)	0.00023	0.000299	0.000161	0.000484	0.18	5.34	263.4	263.9	262.9	Constant displacement rate
Qi & Goldsby (2021)	0.00023	0.000299	0.000161	8.33e-05	0.17	3.46	263.4	263.9	262.9	Constant displacement rate
Qi & Goldsby (2021)	0.00023	0.000299	0.000161	2.51e-05	0.21	2.3	263.4	263.9	262.9	Constant displacement rate
Qi & Goldsby (2021)	0.00023	0.000299	0.000161	4.22e-05	0.2	2.6	263.4	263.9	262.9	Constant displacement rate
Qi & Goldsby (2021)	0.00023	0.000299	0.000161	7.66e-05	0.22	3.02	263.4	263.9	262.9	Constant displacement rate
Qi & Goldsby (2021)	0.00063	0.000819	0.000441	0.000391	0.27	5	263.4	263.9	262.9	Constant displacement rate
Qi & Goldsby (2021)	0.00063	0.000819	0.000441	3.37e-05	0.17	2.7	263.4	263.9	262.9	Constant displacement rate
Qi & Goldsby (2021)	0.00063	0.000819	0.000441	3.37e-05	0.17	2.7	263.4	263.9	262.9	Constant displacement rate
Qi & Goldsby (2021)	0.00063	0.000819	0.000441	3.37e-05	0.17	2.7	263.4	263.9	262.9	Constant displacement rate
Qi & Goldsby (2021)	0.00063	0.000819	0.000441	3.37e-05	0.17	2.7	263.4	263.9	262.9	Constant displacement rate
Qi & Goldsby (2021)	0.00063	0.000819	0.000441	3.37e-05	0.17	2.7	263.4	263.9	262.9	Constant displacement rate
Qi & Goldsby (2021)	0.00063	0.000819	0.000441	3.37e-05	0.17	2.7	263.4	263.9	262.9	Constant displacement rate
Qi & Goldsby (2021)	0.00063	0.000819	0.000441	3.37e-05	0.17	2.7	263.4	263.9	262.9	Constant displacement rate
Qi & Goldsby (2021)	0.00063	0.000819	0.000441	3.37e-05	0.17	2.7	263.4	263.9	262.9	Constant displacement rate
Qi & Goldsby (2021)	0.00063	0.000819	0.000441	3.37e-05	0.17	2.7	263.4	263.9	262.9	Constant displacement rate
Qi & Goldsby (2021)	0.00063	0.000819	0.000441	3.37e-05	0.17	2.7	263.4	263.9	262.9	Constant displacement rate
Qi & Goldsby (2021)	0.00063	0.000819	0.000441	3.37e-05	0.17	2.7	263.4	263.9	262.9	Constant displacement rate
Qi & Goldsby (2021)	0.00063	0.000819	0.000441	3.37e-05	0.17	2.7	263.4	263.9	262.9	Constant displacement rate
Qi & Goldsby (2021)	0.00063	0.000819	0.000441	3.37e-05	0.17	2.7	263.4	263.9	262.9	Constant displacement rate
Qi & Goldsby (2021)	0.00063	0.000819	0.000441	3.37e-05	0.17	2.7	263.4	263.9	262.9	Constant displacement rate
Qi & Goldsby (2021)	0.00063	0.000819	0.000441	3.37e-05	0.17	2.7	263.4	263.9	262.9	Constant displacement rate
Qi & Goldsby (2021)	0.00063	0.000819	0.000441	3.37e-05	0.17	2.7	263.4	263.9	262.9	Constant displacement rate
Qi & Goldsby (2021)	0.00063	0.000819	0.000441	3.37e-05	0.17	2.7	263.4	263.9	262.9	Constant displacement rate
Qi & Goldsby (2021)	0.00063	0.000819	0.000441	3.37e-05	0.17	2.7	263.4	263.9	262.9	Constant displacement rate
Qi & Goldsby (2021)	0.00063	0.000819	0.000441	3.37e-05	0.17	2.7	263.4	263.9	262.9	Constant displacement rate
Qi & Goldsby (2021)	0.00063	0.000819	0.000441	3.37e-05	0.17	2.7	263.4	263.9	262.9	Constant displacement rate
Qi & Goldsby (2021)	0.00063	0.000819	0.000441	3.37e-05	0.17	2.7	263.4	263.9	262.9	Constant displacement rate
Qi & Goldsby (2021)	0.00063	0.000819	0.000441	3.37e-05	0.17	2.7	263.4	263.9	262.9	Constant displacement rate
Qi & Goldsby (2021)	0.00063	0.000819	0.000441	3.37e-05	0.17	2.7	263.4	263.9	262.9	Constant displacement rate
Qi & Goldsby (2021)	0.00063	0.000819	0.000441	3.37e-05	0.17	2.7	263.4	263.9	262.9	Constant displacement rate
Qi & Goldsby (2021)	0.00063	0.000819	0.000441	3.37e-05	0.17	2.7	263.4	263.9	262.9	Constant displacement rate
Qi & Goldsby (2021)	0.00063	0.000819	0.000441	3.37e-05	0.17	2.7	263.4	263.9	262.9	Constant displacement rate
Qi & Goldsby (2021)	0.00063	0.000819	0.000441	3.37e-05	0.17	2.7	263.4	263.9	262.9	Constant displacement rate
Qi & Goldsby (2021)	0.00063	0.000819	0.000441	3.37e-05	0.17	2.7	263.4	263.9	262.9	Constant displacement rate
Qi & Goldsby (2021)	0.00063	0.000819	0.000441	3.37e-05	0.17	2.7	263.4	263.9	262.9	Constant displacement rate
Qi & Goldsby (2021)	0.00063	0.000819	0.000441	3.37e-05	0.17	2.7	263.4	263.9	262.9	Constant displacement rate
Qi & Goldsby (2021)	0.00063	0.000819	0.000441	3.37e-05	0.17	2.7	263.4	263.9	262.9	Constant displacement rate
Qi & Goldsby (2021)	0.00063	0.000819	0.000441	3.37e-05	0.17	2.7	263.4	263.9	262.9	Constant displacement rate
Qi & Goldsby (2021)	0.00063	0.000819	0.000441	3.37e-05	0.17	2.7	263.4	263.9	262.9	Constant displacement rate
Qi & Goldsby (2021)	0.00063	0.000819	0.000441	3.37e-05	0.17	2.7	263.4	263.9	262.9	Constant displacement rate
Qi & Goldsby (2021)	0.00063	0.000819	0.000441	3.37e-05	0.17	2.7	263.4	263.9	262.9	Constant displacement rate
Qi & Goldsby (2021)	0.00063	0.000819	0.000441	3.37e-05	0.17	2.7	263.4	263.9	262.9	Constant displacement rate
Qi & Goldsby (2021)	0.00063	0.000819	0.000441	3.37e-05	0.17	2.7	263.4	263.9	262.9	Constant displacement rate
Qi & Goldsby (2021)	0.00063	0.000819	0.000441	3.37e-05	0.17	2.7	263.4	263.9	262.9	Constant displacement rate
Qi & Goldsby (2021)	0.00063	0.000819	0.000441	3.37e-05	0.17	2.7	263.4	263.9	262.9	Constant displacement rate
Qi & Goldsby (2021)	0.00063	0.000819	0.000441	3.37e-05	0.17	2.7	263.4	263.9	262.9	Constant displacement rate
Qi & Goldsby (2021)	0.00063	0.000819	0.000441	3.37e-05	0.17	2.7	263.4	263.9	262.9	Constant displacement rate
Qi & Goldsby (2021)	0.00063	0.000819	0.000441	3.37e-05	0.17	2.7	263.4	263.9	262.9	Constant displacement rate
Qi & Goldsby (2021)	0.00063	0.000819	0.000441	3.37e-05	0.17	2.7	263.4	263.9	262.9	Constant displacement rate
Qi & Goldsby (2021)	0.00063	0.000819	0.000441	3.37e-05	0.17	2.7	263.4	263.9	262.9	Constant displacement rate
Qi & Goldsby (2021)	0.00063	0.000819	0.000441	3.37e-05	0.17	2.7	263.4	263.9	262.9	Constant displacement rate
Qi & Goldsby (2021)	0.00063	0.000819	0.000441	3.37e-05	0.17	2.7	263.4	263.9	262.9	Constant displacement rate
Qi & Goldsby (2021)	0.00063	0.000819	0.000441	3.37e-05	0.17	2.7	263.4	263.9	262.9	Constant displacement rate
Qi & Goldsby (2021)	0.00063	0.000819	0.000441	3.37e-05	0.17	2.7	263.4	263.9	262.9	Constant displacement rate
Qi & Goldsby (2021)	0.00063	0.000819	0.000441	3.37e-05	0.17	2.7	263.4	263.9	262.9	Constant displacement rate

## Sheet: Supplementary Table 4
Source	GS_ini_mean	GS_ini_upper	GS_ini_lower	rate_c	strain_c	stress_c	T_mean	T_upper	T_lower	exp_type
Glen (1955)	0.0015	0.00195	0.00105	1.23232323232323e-08	0.0100503	0.28	270.9	271.4	270.4	Constant load
Glen (1955)	0.0015	0.00195	0.00105	3.3030303030303e-09	0.0100503	0.22	266.2	266.7	265.7	Constant load
Glen (1955)	0.0015	0.00195	0.00105	8.2929292929293e-08	0.0100503	0.6	266.3	266.8	265.8	Constant load
Glen (1955)	0.0015	0.00195	0.00105	1.56565656565657e-08	0.0100503	0.59	260.3	260.8	259.8	Constant load
Duval & Gac (1980)	0.0018	0.00234	0.00126	1.91919191919192e-08	0.0100503	0.5	268.4	268.9	267.9	Constant stress
Duval & Gac (1980)	0.00506	0.006578	0.003542	9.09090909090909e-09	0.0100503	0.5	266	266.5	265.5	Constant stress
Duval & Gac (1980)	0.00107	0.001391	0.000749	1.01010101010101e-08	0.0100503	0.48	265.8	266.3	265.3	Constant stress
Duval & Gac (1980)	0.0011	0.00143	0.00077	1.21212121212121e-08	0.0100503	0.5	265.8	266.3	265.3	Constant stress
Duval & Gac (1980)	0.0014	0.00182	0.00098	8.08080808080808e-09	0.0100503	0.48	265.8	266.3	265.3	Constant stress
Duval & Gac (1980)	0.007	0.0091	0.0049	4.04040404040404e-09	0.0100503	0.49	265.8	266.3	265.3	Constant stress
Duval & Gac (1980)	0.00188	0.002444	0.001316	7.07070707070707e-09	0.0100503	0.49	265.8	266.3	265.3	Constant stress
Mellor and Cole (1982)	0.0012	0.00156	0.00084	6.38426626323752e-06	0.00853633	3.11	268	268.5	267.5	Constant stress
Mellor and Cole (1982)	0.0012	0.00156	0.00084	6.0618266035646e-06	0.00692392	3.06	268	268.5	267.5	Constant stress
Mellor and Cole (1982)	0.0012	0.00156	0.00084	6.63301362948006e-06	0.00954541	3.07	268	268.5	267.5	Constant stress
Mellor and Cole (1982)	0.0012	0.00156	0.00084	2.62520193861066e-06	0.00964638	2.34	268	268.5	267.5	Constant stress
Mellor and Cole (1982)	0.0012	0.00156	0.00084	1.28062922254714e-05	0.00833464	3.65	268	268.5	267.5	Constant stress
Mellor and Cole (1982)	0.0012	0.00156	0.00084	1.64812942366026e-06	0.0110609	1.86	268	268.5	267.5	Constant stress
Mellor and Cole (1982)	0.0012	0.00156	0.00084	2.19214062026467e-05	0.0101514	3.76	268	268.5	267.5	Constant stress
Mellor and Cole (1982)	0.0012	0.00156	0.00084	3.48273773470624e-06	0.00944446	2.11	268	268.5	267.5	Constant stress
Mellor and Cole (1982)	0.0012	0.00156	0.00084	1.66380961984471e-05	0.00833464	3.26	268	268.5	267.5	Constant stress
Mellor and Cole (1982)	0.0012	0.00156	0.00084	8.41998990408884e-06	0.00954541	2.63	268	268.5	267.5	Constant stress
Mellor and Cole (1982)	0.0012	0.00156	0.00084	2.66236385639371e-05	0.00843548	3.67	268	268.5	267.5	Constant stress
Mellor and Cole (1982)	0.0012	0.00156	0.00084	2.49444556655221e-05	0.00984834	3.67	268	268.5	267.5	Constant stress
Mellor and Cole (1982)	0.0012	0.00156	0.00084	2.45967741935484e-05	0.00803217	3.68	268	268.5	267.5	Constant stress
Mellor and Cole (1982)	0.0012	0.00156	0.00084	5.89365143550344e-07	0.0108587	1.25	268	268.5	267.5	Constant stress
Mellor and Cole (1982)	0.0012	0.00156	0.00084	1.03040711182948e-07	0.0101514	0.8	268	268.5	267.5	Constant stress
Mellor and Cole (1982)	0.0012	0.00156	0.00084	2.52616747181965e-06	0.00642057	2.35	268	268.5	267.5	Constant stress
Mellor and Cole (1982)	0.0012	0.00156	0.00084	5.32836422240129e-07	0.00722605	1.54	268	268.5	267.5	Constant stress
Mellor and Cole (1982)	0.0012	0.00156	0.00084	7.8740157480315e-07	0.00944446	1.54	268	268.5	267.5	Constant stress
Mellor and Cole (1982)	0.0012	0.00156	0.00084	1.16770686531105e-06	0.00662188	1.84	268	268.5	267.5	Constant stress
Mellor and Cole (1982)	0.0012	0.00156	0.00084	1.68194178668547e-06	0.00712532	2	268	268.5	267.5	Constant stress
Mellor and Cole (1982)	0.0012	0.00156	0.00084	1.8152480839048e-06	0.00843548	2	268	268.5	267.5	Constant stress
Mellor and Cole (1982)	0.0012	0.00156	0.00084	2.29177183240787e-07	0.00954541	1	268	268.5	267.5	Constant stress
Mellor and Cole (1982)	0.0012	0.00156	0.00084	1.04061426550818e-07	0.0102524	0.8	268	268.5	267.5	Constant stress
Mellor and Cole (1982)	0.0012	0.00156	0.00084	2.269060104881e-07	0.00843548	1	268	268.5	267.5	Constant stress
Mellor and Cole (1982)	0.0012	0.00156	0.00084	6.9986814078507e-06	0.0142003	2.74	268	268.5	267.5	Constant displacement rate
Mellor and Cole (1982)	0.0012	0.00156	0.00084	6.20682649329541e-06	0.015723	2.59	268	268.5	267.5	Constant displacement rate
Mellor and Cole (1982)	0.0012	0.00156	0.00084	6.27784528149048e-06	0.0124775	3.03	268	268.5	267.5	Constant displacement rate
Mellor and Cole (1982)	0.0012	0.00156	0.00084	5.97875569044006e-06	0.0115666	3.04	268	268.5	267.5	Constant displacement rate
Mellor and Cole (1982)	0.0012	0.00156	0.00084	2.67839094400647e-06	0.0106566	2.32	268	268.5	267.5	Constant displacement rate
Mellor and Cole (1982)	0.0012	0.00156	0.00084	8.44372535140055e-06	0.0111621	3.37	268	268.5	267.5	Constant displacement rate
Mellor and Cole (1982)	0.0012	0.00156	0.00084	1.14372469635628e-05	0.0120726	3.47	268	268.5	267.5	Constant displacement rate
Mellor and Cole (1982)	0.0012	0.00156	0.00084	2.22065206419703e-05	0.00934352	3.63	268	268.5	267.5	Constant displacement rate
Mellor and Cole (1982)	0.0012	0.00156	0.00084	8.3391801142628e-05	0.00230265	5.5	268	268.5	267.5	Constant displacement rate
Mellor and Cole (1982)	0.0012	0.00156	0.00084	0.000796992	0.00250313	7.48	268	268.5	267.5	Constant displacement rate
Mellor and Cole (1982)	0.0012	0.00156	0.00084	0.00114435	0.00380724	10.02	268	268.5	267.5	Constant displacement rate
Mellor and Cole (1982)	0.0012	0.00156	0.00084	0.000103403	0.00390762	5.14	268	268.5	267.5	Constant displacement rate
Mellor and Cole (1982)	0.0012	0.00156	0.00084	5.18825073180579e-05	0.00934352	4.08	268	268.5	267.5	Constant displacement rate
Mellor and Cole (1982)	0.0012	0.00156	0.00084	2.32934980757545e-06	0.0126801	2.06	268	268.5	267.5	Constant displacement rate
Mellor and Cole (1982)	0.0012	0.00156	0.00084	1.24393203883495e-05	0.0112632	3.23	268	268.5	267.5	Constant displacement rate
Mellor and Cole (1982)	0.0012	0.00156	0.00084	1.35367208808971e-05	0.0101514	3.18	268	268.5	267.5	Constant displacement rate
Mellor and Cole (1982)	0.0012	0.00156	0.00084	1.16267313719543e-05	0.0109598	3.21	268	268.5	267.5	Constant displacement rate
Mellor and Cole (1982)	0.0012	0.00156	0.00084	1.3317191283293e-05	0.00883895	3.2	268	268.5	267.5	Constant displacement rate
Mellor and Cole (1982)	0.0012	0.00156	0.00084	1.65046577561766e-06	0.0124775	1.67	268	268.5	267.5	Constant displacement rate
Mellor and Cole (1982)	0.0012	0.00156	0.00084	1.65941515734089e-06	0.011769	1.62	268	268.5	267.5	Constant displacement rate
Mellor and Cole (1982)	0.0012	0.00156	0.00084	1.00806451612903e-07	0.00803217	0.69	268	268.5	267.5	Constant displacement rate
Mellor and Cole (1982)	0.0012	0.00156	0.00084	1.16479286944191e-06	0.0127813	1.45	268	268.5	267.5	Constant displacement rate
Mellor and Cole (1982)	0.0012	0.00156	0.00084	7.89793438639125e-07	0.0124775	1.24	268	268.5	267.5	Constant displacement rate
Mellor and Cole (1982)	0.0012	0.00156	0.00084	5.36437246963563e-07	0.0120726	1.15	268	268.5	267.5	Constant displacement rate
Mellor and Cole (1982)	0.0012	0.00156	0.00084	2.27272727272727e-06	0.0100503	2	268	268.5	267.5	Constant displacement rate
Mellor and Cole (1982)	0.0012	0.00156	0.00084	7.88197251414713e-07	0.0104545	1.34	268	268.5	267.5	Constant displacement rate
Jones & Chew (1983)	0.00113	0.001469	0.000791	0.000556849	0.0123763	7.64	263	263.5	262.5	Constant displacement rate
Jones & Chew (1983)	0.0013	0.00169	0.00091	0.00055438	0.00793137	7.06	263	263.5	262.5	Constant displacement rate
Jones & Chew (1983)	0.0013	0.00169	0.00091	0.00055438	0.00793137	7	263	263.5	262.5	Constant displacement rate
Jones & Chew (1983)	0.0013	0.00169	0.00091	0.00055438	0.00793137	6.98	263	263.5	262.5	Constant displacement rate
Jones & Chew (1983)	0.0013	0.00169	0.00091	0.000558376	0.0151136	6.88	263	263.5	262.5	Constant displacement rate
Jones & Chew (1983)	0.0013	0.00169	0.00091	0.000556624	0.0119714	6.56	263	263.5	262.5	Constant displacement rate
Jones & Chew (1983)	0.0013	0.00169	0.00091	0.000555331	0.00964638	6.94	263	263.5	262.5	Constant displacement rate
Jones & Chew (1983)	0.0011	0.00143	0.00077	0.000553431	0.0062193	8.76	263	263.5	262.5	Constant displacement rate
Jones & Chew (1983)	0.0012	0.00156	0.00084	0.000552153	0.00390762	7.46	263	263.5	262.5	Constant displacement rate
Jones & Chew (1983)	9e-04	0.00117	0.00063	0.000555499	0.00994933	7.11	263	263.5	262.5	Constant displacement rate
Jones & Chew (1983)	0.001	0.0013	7e-04	0.000553264	0.00591747	7.49	263	263.5	262.5	Constant displacement rate
Jones & Chew (1983)	9e-04	0.00117	0.00063	0.000553097	0.00561574	7.79	263	263.5	262.5	Constant displacement rate
Jones & Chew (1983)	0.001	0.0013	7e-04	0.000553821	0.00692392	7.47	263	263.5	262.5	Constant displacement rate
Jones & Chew (1983)	0.0012	0.00156	0.00084	0.000553097	0.00561574	7.88	263	263.5	262.5	Constant displacement rate
Jones & Chew (1983)	0.0012	0.00156	0.00084	0.000553821	0.00692392	7.66	263	263.5	262.5	Constant displacement rate
Jones & Chew (1983)	0.0013	0.00169	0.00091	0.000553654	0.00662188	7.57	263	263.5	262.5	Constant displacement rate
Jones & Chew (1983)	0.0013	0.00169	0.00091	0.000553821	0.00692392	8.03	263	263.5	262.5	Constant displacement rate
Jones & Chew (1983)	0.0015	0.00195	0.00105	0.000553264	0.00591747	7.75	263	263.5	262.5	Constant displacement rate
Jones & Chew (1983)	0.0014	0.00182	0.00098	0.000553654	0.00662188	8.53	263	263.5	262.5	Constant displacement rate
Jones & Chew (1983)	0.0017	0.00221	0.00119	0.000553654	0.00662188	6.91	263	263.5	262.5	Constant displacement rate
Jones & Chew (1983)	0.0013	0.00169	0.00091	0.00055438	0.00793137	6.59	263	263.5	262.5	Constant displacement rate
Jones & Chew (1983)	0.0012	0.00156	0.00084	0.000553264	0.00591747	7.11	263	263.5	262.5	Constant displacement rate
Jones & Chew (1983)	0.0013	0.00169	0.00091	0.000553097	0.00561574	7.02	263	263.5	262.5	Constant displacement rate
Jones & Chew (1983)	0.0013	0.00169	0.00091	0.000552708	0.00491204	7.79	263	263.5	262.5	Constant displacement rate
Jones & Chew (1983)	0.0014	0.00182	0.00098	0.000553097	0.00561574	8.32	263	263.5	262.5	Constant displacement rate
Jones & Chew (1983)	0.0018	0.00234	0.00126	0.000553264	0.00591747	7.75	263	263.5	262.5	Constant displacement rate
Jones & Chew (1983)	0.0011	0.00143	0.00077	0.000553821	0.00692392	7.6	263	263.5	262.5	Constant displacement rate
Jones & Chew (1983)	0.001	0.0013	7e-04	0.000552708	0.00491204	7.43	263	263.5	262.5	Constant displacement rate
Jones & Chew (1983)	0.001	0.0013	7e-04	0.000553376	0.00611868	7.71	263	263.5	262.5	Constant displacement rate
Jones & Chew (1983)	0.001	0.0013	7e-04	0.000553376	0.00611868	7.78	263	263.5	262.5	Constant displacement rate
Jones & Chew (1983)	0.00095	0.001235	0.000665	0.000552986	0.00541463	8.43	263	263.5	262.5	Constant displacement rate
Jones & Chew (1983)	0.0014	0.00182	0.00098	0.000552986	0.00541463	8.58	263	263.5	262.5	Constant displacement rate
Jones & Chew (1983)	0.0014	0.00182	0.00098	0.000552986	0.00541463	7.75	263	263.5	262.5	Constant displacement rate
Jones & Chew (1983)	0.00089	0.001157	0.000623	0.000553933	0.00712532	8.82	263	263.5	262.5	Constant displacement rate
Jones & Chew (1983)	8e-04	0.00104	0.00056	0.000554883	0.00883895	7.24	263	263.5	262.5	Constant displacement rate
Jones & Chew (1983)	8e-04	0.00104	0.00056	0.000553376	0.00611868	7.25	263	263.5	262.5	Constant displacement rate
Jones & Chew (1983)	8e-04	0.00104	0.00056	0.000553654	0.00662188	8.56	263	263.5	262.5	Constant displacement rate
Jones & Chew (1983)	8e-04	0.00104	0.00056	0.000553376	0.00611868	7.7	263	263.5	262.5	Constant displacement rate
Jones & Chew (1983)	0.0011	0.00143	0.00077	0.000552986	0.00541463	8.02	263	263.5	262.5	Constant displacement rate
Jones & Chew (1983)	0.0011	0.00143	0.00077	0.000552986	0.00541463	8.38	263	263.5	262.5	Constant displacement rate
Jones & Chew (1983)	0.00093	0.001209	0.000651	0.000552986	0.00541463	7.94	263	263.5	262.5	Constant displacement rate
Jones & Chew (1983)	0.00093	0.001209	0.000651	0.000553376	0.00611868	7.59	263	263.5	262.5	Constant displacement rate
Jones & Chew (1983)	0.00093	0.001209	0.000651	0.00055578	0.0104545	6.45	263	263.5	262.5	Constant displacement rate
Jones & Chew (1983)	0.00972	0.012636	0.006804	0.000554771	0.00863719	7.26	263	263.5	262.5	Constant displacement rate
Jones & Chew (1983)	0.00071	0.000923	0.000497	0.000553654	0.00662188	7.15	263	263.5	262.5	Constant displacement rate
Jones & Chew (1983)	0.00071	0.000923	0.000497	0.000554827	0.00873807	6.91	263	263.5	262.5	Constant displacement rate
Jones & Chew (1983)	8e-04	0.00104	0.00056	0.000552986	0.00541463	7.29	263	263.5	262.5	Constant displacement rate
Jones & Chew (1983)	0.00194	0.002522	0.001358	0.00055332	0.00601807	6.52	263	263.5	262.5	Constant displacement rate
Jones & Chew (1983)	0.00163	0.002119	0.001141	0.000553431	0.0062193	7.08	263	263.5	262.5	Constant displacement rate
Jones & Chew (1983)	0.00067	0.000871	0.000469	0.000554883	0.00883895	7.28	263	263.5	262.5	Constant displacement rate
Jones & Chew (1983)	0.00188	0.002444	0.001316	0.000555892	0.0106566	7.06	263	263.5	262.5	Constant displacement rate
Jones & Chew (1983)	0.00163	0.002119	0.001141	0.000553431	0.0062193	7.15	263	263.5	262.5	Constant displacement rate
Jones & Chew (1983)	0.00145	0.001885	0.001015	0.000552931	0.00531409	8.07	263	263.5	262.5	Constant displacement rate
Jones & Chew (1983)	0.00194	0.002522	0.001358	0.00055578	0.0104545	7.28	263	263.5	262.5	Constant displacement rate
Jones & Chew (1983)	0.00156	0.002028	0.001092	0.000555443	0.00984834	7.29	263	263.5	262.5	Constant displacement rate
Jones & Chew (1983)	0.00166	0.002158	0.001162	0.000553598	0.00652122	8.15	263	263.5	262.5	Constant displacement rate
Jones & Chew (1983)	0.00069	0.000897	0.000483	0.000554883	0.00883895	6.92	263	263.5	262.5	Constant displacement rate
Jones & Chew (1983)	0.00069	0.000897	0.000483	0.000555499	0.00994933	7.2	263	263.5	262.5	Constant displacement rate
Jones & Chew (1983)	0.00069	0.000897	0.000483	0.0005541	0.00742752	7.58	263	263.5	262.5	Constant displacement rate
Jones & Chew (1983)	0.00066	0.000858	0.000462	0.000553654	0.00662188	7.36	263	263.5	262.5	Constant displacement rate
Jones & Chew (1983)	0.00056	0.000728	0.000392	0.000555499	0.00994933	7.3	263	263.5	262.5	Constant displacement rate
Jones & Chew (1983)	6e-04	0.00078	0.00042	0.000553042	0.00551518	8.65	263	263.5	262.5	Constant displacement rate
Durham et al. (1983)	0.0015	0.00195	0.00105	0.00035	0.01	23.2	243	243.5	242.5	Constant displacement rate
Durham et al. (1983)	0.0015	0.00195	0.00105	0.00035	0.01	14.4	258	258.5	257.5	Constant displacement rate
Jacka (1984a)	0.0017	0.00221	0.00119	1.323587291915e-09	0.0127673	0.212132	268	268.5	267.5	Constant stress
Jacka (1984a)	0.0017	0.00221	0.00119	2.84342528881164e-09	0.0106339	0.275772	268	268.5	267.5	Constant stress
Jacka (1984a)	0.0017	0.00221	0.00119	1.23515041237016e-08	0.00779287	0.424264	268	268.5	267.5	Constant stress
Jacka (1984a)	0.0017	0.00221	0.00119	5.53415162304123e-08	0.00679941	0.636396	268	268.5	267.5	Constant stress
Jacka (1984a)	0.0017	0.00221	0.00119	2.69631511995446e-07	0.00694131	1.27279	268	268.5	267.5	Constant stress
Jacka (1984a)	0.0017	0.00221	0.00119	9.92749342557155e-07	0.00566462	1.69706	268	268.5	267.5	Constant stress
Jacka (1984a)	0.0017	0.00221	0.00119	4.97144541431837e-09	0.00878679	0.424264	262.4	262.9	261.9	Constant stress
Jacka (1984a)	0.0017	0.00221	0.00119	1.70401567161319e-08	0.00821878	0.636396	262.4	262.9	261.9	Constant stress
Jacka (1984a)	0.0017	0.00221	0.00119	4.12064729077667e-08	0.00949703	0.848528	262.4	262.9	261.9	Constant stress
Jacka (1984a)	0.0017	0.00221	0.00119	1.420512953226e-07	0.00892882	1.27279	262.4	262.9	261.9	Constant stress
Jacka (1984a)	0.0017	0.00221	0.00119	3.69411349646877e-07	0.00935497	1.69706	262.4	262.9	261.9	Constant stress
Jacka (1984a)	0.0017	0.00221	0.00119	5.68685057762328e-07	0.0106339	2.12132	262.4	262.9	261.9	Constant stress
Jacka (1984a)	0.0017	0.00221	0.00119	4.68505328830062e-10	0.00779287	0.275772	255.2	255.7	254.7	Constant stress
Jacka (1984a)	0.0017	0.00221	0.00119	4.68736281921446e-09	0.00878679	0.636396	255.2	255.7	254.7	Constant stress
Jacka (1984a)	0.0017	0.00221	0.00119	1.02255337338622e-08	0.00850277	0.848528	255.2	255.7	254.7	Constant stress
Jacka (1984a)	0.0017	0.00221	0.00119	3.69775247912811e-08	0.0113448	1.27279	255.2	255.7	254.7	Constant stress
Jacka (1984a)	0.0017	0.00221	0.00119	8.24187443713449e-08	0.00963911	1.69706	255.2	255.7	254.7	Constant stress
Jacka (1984a)	0.0017	0.00221	0.00119	2.98580649166785e-07	0.0107761	2.54558	255.2	255.7	254.7	Constant stress
Jacka (1984a)	0.0017	0.00221	0.00119	7.1000652983883e-11	0.00821878	0.148492	240.5	241	240	Constant stress
Jacka (1984a)	0.0017	0.00221	0.00119	1.56223432045118e-10	0.00850277	0.212132	240.5	241	240	Constant stress
Jacka (1984a)	0.0017	0.00221	0.00119	2.13031952788797e-10	0.00850277	0.275772	240.5	241	240	Constant stress
Jacka (1984a)	0.0017	0.00221	0.00119	4.54820081937125e-10	0.0100654	0.424264	240.5	241	240	Constant stress
Jacka (1984a)	0.0017	0.00221	0.00119	1.84614695119492e-09	0.00836077	0.763675	240.5	241	240	Constant stress
Jacka (1984a)	0.0017	0.00221	0.00119	4.68373352171394e-09	0.00722512	1.06066	240.5	241	240	Constant stress
Jacka (1984a)	0.0017	0.00221	0.00119	7.80567262715497e-09	0.00708321	1.27279	240.5	241	240	Constant stress
Jacka (1984a)	0.0017	0.00221	0.00119	1.42121278257613e-08	0.0099233	1.69706	240.5	241	240	Constant stress
Jacka (1984a)	0.0017	0.00221	0.00119	2.98622636486332e-08	0.0110604	2.12132	240.5	241	240	Constant stress
Jacka (1984b)	0.0045	0.00585	0.00315	4.8491163278413e-08	0.0170405	0.636396	266	266.5	265.5	Constant load
Jacka (1984b)	0.004	0.0052	0.0028	4.55107997431153e-08	0.0113448	0.636396	266	266.5	265.5	Constant load
Jacka (1984b)	0.0025	0.00325	0.00175	7.11106245986176e-08	0.0113448	0.636396	266	266.5	265.5	Constant load
Jacka (1984b)	0.0022	0.00286	0.00154	4.55747752715393e-08	0.0141907	0.636396	266	266.5	265.5	Constant load
Jacka (1984b)	0.0015	0.00195	0.00105	3.55803035461021e-08	0.0127673	0.636396	266	266.5	265.5	Constant load
Jacka (1984b)	0.0045	0.00585	0.00315	1.70665499036682e-08	0.0113448	0.551543	263	263.5	262.5	Constant load
Jacka (1984b)	0.0045	0.00585	0.00315	1.56443374116959e-08	0.0113448	0.551543	263	263.5	262.5	Constant load
Jacka (1984b)	0.004	0.0052	0.0028	1.71864658567289e-08	0.0256133	0.551543	263	263.5	262.5	Constant load
Jacka (1984b)	0.0025	0.00325	0.00175	1.57762322383372e-08	0.0284787	0.551543	263	263.5	262.5	Constant load
Jacka (1984b)	0.0022	0.00286	0.00154	1.43420293075792e-08	0.0284787	0.551543	263	263.5	262.5	Constant load
Jacka (1984b)	0.0015	0.00195	0.00105	1.33380872560487e-08	0.0284787	0.551543	263	263.5	262.5	Constant load
Jacka (1984b)	0.0045	0.00585	0.00315	1.85277461612361e-07	0.0156151	1.06066	264	264.5	263.5	Constant load
Jacka (1984b)	0.0025	0.00325	0.00175	1.28269011885481e-07	0.0156151	1.06066	264	264.5	263.5	Constant load
Jacka (1984b)	0.0022	0.00286	0.00154	1.1519921184976e-07	0.0113448	1.06066	264	264.5	263.5	Constant load
Jacka (1984b)	0.0015	0.00195	0.00105	1.84757661734897e-07	0.0099233	1.06066	264	264.5	263.5	Constant load
Jacka & Maccagnan (1984)	0.0022	0.00286	0.00154	2.8444249839447e-08	0.0113448	0.424264	270	270.5	269.5	Constant stress
Jacka & Maccagnan (1984)	0.0022	0.00286	0.00154	2.76684872823886e-08	0.0170405	0.424264	270	270.5	269.5	Constant stress
Gao & Jacka (1987)	7e-04	0.00091	0.00049	2.24551619647029e-08	0.0099233	0.424264	269.7	270.2	269.2	Constant stress
Jacka (1994)	0.0017	0.00221	0.00119	1.56344403165887e-08	0.0100654	0.424264	269.7	270.2	269.2	Constant stress
Jacka (1994)	0.0017	0.00221	0.00119	1.98997782057215e-08	0.0102075	0.424264	269.7	270.2	269.2	Constant stress
Jacka (1994)	0.0017	0.00221	0.00119	2.8470240489159e-08	0.0131942	0.424264	269.7	270.2	269.2	Constant stress
Jacka (1994)	0.0017	0.00221	0.00119	1.56311411738758e-08	0.00963911	0.424264	269.7	270.2	269.2	Constant stress
Jacka (1994)	0.0014	0.00182	0.00098	2.06510700449163e-08	0.0141907	0.53033	268	268.5	267.5	Constant stress
Jacka (1994)	0.0014	0.00182	0.00098	2.20752817721519e-08	0.0141907	0.53033	268	268.5	267.5	Constant stress
Jacka (1994)	0.0014	0.00182	0.00098	2.42115993630053e-08	0.0141907	0.53033	268	268.5	267.5	Constant stress
Jacka (1994)	0.0014	0.00182	0.00098	4.20142459534503e-08	0.0141907	0.53033	268	268.5	267.5	Constant stress
Jacka (1994)	0.0014	0.00182	0.00098	4.84231987260105e-08	0.0141907	0.53033	268	268.5	267.5	Constant stress
Jacka (1994)	0.0029	0.00377	0.00203	1.85147524540629e-08	0.0141907	0.53033	268	268.5	267.5	Constant stress
Jacka (1994)	0.0029	0.00377	0.00203	2.13631759085341e-08	0.0141907	0.53033	268	268.5	267.5	Constant stress
Jacka (1994)	0.0029	0.00377	0.00203	1.99389641812985e-08	0.0141907	0.53033	268	268.5	267.5	Constant stress
Jacka (1994)	0.0029	0.00377	0.00203	4.69989869987749e-08	0.0141907	0.53033	268	268.5	267.5	Constant stress
Jacka (1994)	0.0029	0.00377	0.00203	5.91047866802776e-08	0.0141907	0.53033	268	268.5	267.5	Constant stress
Jacka (1994)	0.0014	0.00182	0.00098	2.42115993630053e-08	0.0141907	0.53033	268	268.5	267.5	Constant stress
Jacka (1994)	0.0014	0.00182	0.00098	2.49237052266231e-08	0.0141907	0.53033	268	268.5	267.5	Constant stress
Jacka (1994)	0.0014	0.00182	0.00098	3.63173990445079e-08	0.0141907	0.53033	268	268.5	267.5	Constant stress
Jacka (1994)	0.0014	0.00182	0.00098	3.34689755900367e-08	0.0141907	0.53033	268	268.5	267.5	Constant stress
Jacka (1994)	0.0014	0.00182	0.00098	3.84537166353613e-08	0.0141907	0.53033	268	268.5	267.5	Constant stress
Jacka (1994)	0.0014	0.00182	0.00098	3.27568697264189e-08	0.0141907	0.53033	268	268.5	267.5	Constant stress
Jacka (1994)	0.0014	0.00182	0.00098	3.84537166353613e-08	0.0141907	0.53033	268	268.5	267.5	Constant stress
Jacka (1994)	0.0014	0.00182	0.00098	3.84537166353613e-08	0.0141907	0.53033	268	268.5	267.5	Constant stress
Jacka (1994)	0.0014	0.00182	0.00098	2.77721286810943e-08	0.0141907	0.53033	268	268.5	267.5	Constant stress
Jacka (1994)	0.0014	0.00182	0.00098	3.20447638628011e-08	0.0141907	0.53033	268	268.5	267.5	Constant stress
Jacka (1994)	0.0014	0.00182	0.00098	3.63173990445079e-08	0.0141907	0.53033	268	268.5	267.5	Constant stress
Jacka (1994)	0.0014	0.00182	0.00098	3.13326579991833e-08	0.0141907	0.53033	268	268.5	267.5	Constant stress
Jacka (1994)	0.0014	0.00182	0.00098	3.06205521355655e-08	0.0141907	0.53033	268	268.5	267.5	Constant stress
Jacka (1994)	0.0014	0.00182	0.00098	2.99084462719477e-08	0.0141907	0.53033	268	268.5	267.5	Constant stress
Jacka (1994)	0.0014	0.00182	0.00098	3.27568697264189e-08	0.0141907	0.53033	268	268.5	267.5	Constant stress
Jacka (1994)	0.0014	0.00182	0.00098	1.56663289995916e-08	0.0141907	0.53033	268	268.5	267.5	Constant stress
Jacka (1994)	0.0014	0.00182	0.00098	1.49542231359738e-08	0.0141907	0.53033	268	268.5	267.5	Constant stress
Jacka (1994)	0.0014	0.00182	0.00098	1.4242117272356e-08	0.0141907	0.53033	268	268.5	267.5	Constant stress
Goldsby & Kohlstedt (1997)	8e-06	1.04e-05	5.6e-06	3.74282912240805e-08	0.01	0.246037	236	236.5	235.5	Constant load
Goldsby & Kohlstedt (1997)	8e-06	1.04e-05	5.6e-06	7.14167364109734e-08	0.01	0.313979	236	236.5	235.5	Constant load
Goldsby & Kohlstedt (1997)	8e-06	1.04e-05	5.6e-06	2.8661571574642e-07	0.01	0.606597	236	236.5	235.5	Constant load
Goldsby & Kohlstedt (1997)	8e-06	1.04e-05	5.6e-06	1.18467711758148e-06	0.01	1.5216	236	236.5	235.5	Constant load
Goldsby & Kohlstedt (1997)	8e-06	1.04e-05	5.6e-06	1.46960289897965e-06	0.01	1.61324	236	236.5	235.5	Constant load
Goldsby & Kohlstedt (1997)	8e-06	1.04e-05	5.6e-06	2.14733597482085e-06	0.01	2.10136	236	236.5	235.5	Constant load
Goldsby & Kohlstedt (1997)	8e-06	1.04e-05	5.6e-06	2.84184246806359e-06	0.01	2.58345	236	236.5	235.5	Constant load
Goldsby & Kohlstedt (1997)	8e-06	1.04e-05	5.6e-06	5.59886505286027e-06	0.01	3.61077	236	236.5	235.5	Constant load
Goldsby & Kohlstedt (1997)	8e-06	1.04e-05	5.6e-06	6.18301072751713e-06	0.01	3.73852	236	236.5	235.5	Constant load
Goldsby & Kohlstedt (1997)	8e-06	1.04e-05	5.6e-06	1.36678435823935e-05	0.01	5.79295	236	236.5	235.5	Constant load
Goldsby & Kohlstedt (1997)	8e-06	1.04e-05	5.6e-06	2.69401494106367e-05	0.01	7.73749	236	236.5	235.5	Constant load
Goldsby & Kohlstedt (1997)	2.6e-05	3.38e-05	1.82e-05	2.27771824185732e-07	0.01	1.13946	236	236.5	235.5	Constant load
Goldsby & Kohlstedt (1997)	2.6e-05	3.38e-05	1.82e-05	2.47286267818702e-07	0.01	1.22039	236	236.5	235.5	Constant load
Goldsby & Kohlstedt (1997)	2.6e-05	3.38e-05	1.82e-05	4.82280830381647e-07	0.01	1.93241	236	236.5	235.5	Constant load
Goldsby & Kohlstedt (1997)	2.6e-05	3.38e-05	1.82e-05	9.06775964583904e-07	0.01	2.15179	236	236.5	235.5	Constant load
Goldsby & Kohlstedt (1997)	2.6e-05	3.38e-05	1.82e-05	9.06775964583904e-07	0.01	2.61096	236	236.5	235.5	Constant load
Goldsby & Kohlstedt (1997)	2.6e-05	3.38e-05	1.82e-05	9.74540741766307e-07	0.01	3.3243	236	236.5	235.5	Constant load
Goldsby & Kohlstedt (1997)	2.6e-05	3.38e-05	1.82e-05	1.43648137689049e-06	0.01	4.25991	236	236.5	235.5	Constant load
Goldsby & Kohlstedt (1997)	2.6e-05	3.38e-05	1.82e-05	2.30038220828702e-06	0.01	5.18681	236	236.5	235.5	Constant load
Goldsby & Kohlstedt (1997)	2.6e-05	3.38e-05	1.82e-05	3.71877583324936e-06	0.01	6.06736	236	236.5	235.5	Constant load
Goldsby & Kohlstedt (1997)	2.6e-05	3.38e-05	1.82e-05	9.56973694587658e-06	0.01	6.86594	236	236.5	235.5	Constant load
Goldsby & Kohlstedt (1997)	2.6e-05	3.38e-05	1.82e-05	1.17733485094014e-05	0.01	7.36207	236	236.5	235.5	Constant load
Goldsby & Kohlstedt (1997)	2.6e-05	3.38e-05	1.82e-05	1.54810352670893e-05	0.01	7.85416	236	236.5	235.5	Constant load
Goldsby & Kohlstedt (1997)	2.6e-05	3.38e-05	1.82e-05	1.78196840681642e-05	0.01	8.32339	236	236.5	235.5	Constant load
Goldsby & Kohlstedt (1997)	2.6e-05	3.38e-05	1.82e-05	2.50668637245364e-05	0.01	8.53886	236	236.5	235.5	Constant load
Goldsby & Kohlstedt (1997)	2.6e-05	3.38e-05	1.82e-05	3.79489706207635e-05	0.01	9.49074	236	236.5	235.5	Constant load
Goldsby & Kohlstedt (1997)	2.6e-05	3.38e-05	1.82e-05	5.84386264955661e-05	0.01	10.4304	236	236.5	235.5	Constant load
Goldsby & Kohlstedt (1997)	4e-05	5.2e-05	2.8e-05	3.87436024728002e-08	0.01	0.536785	236	236.5	235.5	Constant load
Goldsby & Kohlstedt (1997)	4e-05	5.2e-05	2.8e-05	4.27267638159979e-08	0.01	0.62273	236	236.5	235.5	Constant load
Goldsby & Kohlstedt (1997)	4e-05	5.2e-05	2.8e-05	1.09597336552381e-07	0.01	1.03395	236	236.5	235.5	Constant load
Goldsby & Kohlstedt (1997)	4e-05	5.2e-05	2.8e-05	1.89234361864498e-07	0.01	1.31099	236	236.5	235.5	Constant load
Goldsby & Kohlstedt (1997)	4e-05	5.2e-05	2.8e-05	2.17370197515712e-07	0.01	1.60066	236	236.5	235.5	Constant load
Goldsby & Kohlstedt (1997)	4e-05	5.2e-05	2.8e-05	6.42539750037302e-07	0.01	2.64606	236	236.5	235.5	Constant load
Goldsby & Kohlstedt (1997)	4e-05	5.2e-05	2.8e-05	1.16493045699045e-06	0.01	3.61327	236	236.5	235.5	Constant load
Goldsby & Kohlstedt (1997)	4e-05	5.2e-05	2.8e-05	1.92930104705785e-06	0.01	4.57826	236	236.5	235.5	Constant load
Goldsby & Kohlstedt (1997)	4e-05	5.2e-05	2.8e-05	2.99226463660819e-06	0.01	5.51061	236	236.5	235.5	Constant load
Goldsby & Kohlstedt (1997)	4e-05	5.2e-05	2.8e-05	5.17130317916962e-06	0.01	6.5268	236	236.5	235.5	Constant load
Goldsby & Kohlstedt (1997)	8.9e-05	0.0001157	6.23e-05	5.02573980109592e-08	0.01	1.47639	236	236.5	235.5	Constant load
Goldsby & Kohlstedt (1997)	8.9e-05	0.0001157	6.23e-05	6.61149996541045e-08	0.01	1.53993	236	236.5	235.5	Constant load
Goldsby & Kohlstedt (1997)	8.9e-05	0.0001157	6.23e-05	1.14974095058049e-07	0.01	2.13796	236	236.5	235.5	Constant load
Goldsby & Kohlstedt (1997)	8.9e-05	0.0001157	6.23e-05	1.51077573192499e-07	0.01	2.40049	236	236.5	235.5	Constant load
Goldsby & Kohlstedt (1997)	8.9e-05	0.0001157	6.23e-05	4.15432051241861e-07	0.01	3.25162	236	236.5	235.5	Constant load
Goldsby & Kohlstedt (1997)	8.9e-05	0.0001157	6.23e-05	9.52138223021403e-07	0.01	4.13238	236	236.5	235.5	Constant load
Goldsby & Kohlstedt (1997)	4e-06	5.2e-06	2.8e-06	6.25460661742488e-08	0.01	5.00611	193	193.5	192.5	Constant load
Goldsby & Kohlstedt (1997)	4e-06	5.2e-06	2.8e-06	6.24453350280502e-08	0.01	5.89658	193	193.5	192.5	Constant load
Goldsby & Kohlstedt (1997)	4e-06	5.2e-06	2.8e-06	1.27497009994371e-07	0.01	7.21772	193	193.5	192.5	Constant load
Goldsby & Kohlstedt (1997)	4e-06	5.2e-06	2.8e-06	1.8724058959868e-07	0.01	8.90635	193	193.5	192.5	Constant load
Goldsby & Kohlstedt (1997)	4e-06	5.2e-06	2.8e-06	2.84642667037422e-07	0.01	10.3562	193	193.5	192.5	Constant load
Goldsby & Kohlstedt (1997)	4e-06	5.2e-06	2.8e-06	3.90571005693757e-07	0.01	12.2264	193	193.5	192.5	Constant load
Goldsby & Kohlstedt (1997)	4e-06	5.2e-06	2.8e-06	6.42835718671385e-07	0.01	14.6184	193	193.5	192.5	Constant load
Goldsby & Kohlstedt (1997)	4e-06	5.2e-06	2.8e-06	6.5328095883039e-07	0.01	15.7797	193	193.5	192.5	Constant load
Goldsby & Kohlstedt (1997)	4e-06	5.2e-06	2.8e-06	7.91954078991278e-07	0.01	16.9668	193	193.5	192.5	Constant load
Goldsby & Kohlstedt (1997)	4e-06	5.2e-06	2.8e-06	1.05730430374218e-06	0.01	18.3527	193	193.5	192.5	Constant load
Goldsby & Kohlstedt (1997)	4e-06	5.2e-06	2.8e-06	8.59805066661175e-08	0.01	1.5787	208	208.5	207.5	Constant load
Goldsby & Kohlstedt (1997)	4e-06	5.2e-06	2.8e-06	2.91809885374184e-07	0.01	2.61879	208	208.5	207.5	Constant load
Goldsby & Kohlstedt (1997)	4e-06	5.2e-06	2.8e-06	8.22810831267932e-07	0.01	3.52533	208	208.5	207.5	Constant load
Goldsby & Kohlstedt (1997)	4e-06	5.2e-06	2.8e-06	8.79832499441866e-07	0.01	3.93459	208	208.5	207.5	Constant load
Goldsby & Kohlstedt (1997)	4e-06	5.2e-06	2.8e-06	1.91029306916366e-06	0.01	5.37279	208	208.5	207.5	Constant load
Goldsby & Kohlstedt (1997)	4e-06	5.2e-06	2.8e-06	2.34153147516931e-06	0.01	5.93745	208	208.5	207.5	Constant load
Goldsby & Kohlstedt (1997)	4e-06	5.2e-06	2.8e-06	2.60315483137418e-06	0.01	7.23103	208	208.5	207.5	Constant load
Goldsby & Kohlstedt (1997)	4e-06	5.2e-06	2.8e-06	4.2884465349682e-06	0.01	7.87952	208	208.5	207.5	Constant load
Jacka & Li (2000)	0.0017	0.00221	0.00119	1.56663289995916e-08	0.0141907	0.424264	268	268.5	267.5	Constant stress
Jacka & Li (2000)	0.0017	0.00221	0.00119	5.83926808166598e-09	0.0141907	0.424264	263	263.5	262.5	Constant stress
Jacka & Li (2000)	0.0017	0.00221	0.00119	1.01092746467626e-09	0.0428642	0.212132	258	258.5	257.5	Constant stress
Jacka & Li (2000)	0.0017	0.00221	0.00119	4.27263518170681e-09	0.0141907	0.424264	258	258.5	257.5	Constant stress
Jacka & Li (2000)	0.0017	0.00221	0.00119	1.02543244360963e-08	0.0141907	0.636396	258	258.5	257.5	Constant stress
Jacka & Li (2000)	0.0017	0.00221	0.00119	1.99389641812985e-08	0.0141907	0.848528	258	258.5	257.5	Constant stress
Jacka & Li (2000)	0.0017	0.00221	0.00119	4.84231987260105e-08	0.0141907	1.06066	258	258.5	257.5	Constant stress
Jacka & Li (2000)	0.0017	0.00221	0.00119	7.07649225273385e-10	0.0428642	0.212132	254	254.5	253.5	Constant stress
Jacka & Li (2000)	0.0017	0.00221	0.00119	1.56663289995916e-09	0.0141907	0.424264	254	254.5	253.5	Constant stress
Jacka & Li (2000)	0.0017	0.00221	0.00119	5.69684690894242e-09	0.0141907	0.636396	254	254.5	253.5	Constant stress
Jacka & Li (2000)	0.0017	0.00221	0.00119	1.26754843723969e-08	0.0141907	0.848528	254	254.5	253.5	Constant stress
Jacka & Li (2000)	0.0017	0.00221	0.00119	1.11088514724377e-07	0.0141907	1.69706	254	254.5	253.5	Constant stress
Jacka & Li (2000)	0.0017	0.00221	0.00119	1.03981110652416e-09	0.0428642	0.424264	252	252.5	251.5	Constant stress
Jacka & Li (2000)	0.0017	0.00221	0.00119	1.56663289995916e-08	0.0141907	1.16673	252	252.5	251.5	Constant stress
Jacka & Li (2000)	0.0017	0.00221	0.00119	5.98168925438954e-10	0.0141907	1.16673	228	228.5	227.5	Constant stress
Piazolo et al. (2013)	0.000495	0.0006435	0.0003465	6.10749185667752e-07	0.0177567	1.22	266	266.5	265.5	Constant displacement rate
Piazolo et al. (2013)	0.000495	0.0006435	0.0003465	2.54790052996331e-06	0.018979	2.07	266	266.5	265.5	Constant displacement rate
Piazolo et al. (2013)	0.000495	0.0006435	0.0003465	1.02543068088597e-05	0.0251127	3.11	266	266.5	265.5	Constant displacement rate
Montagnat et al (2015)	0.00105067	0.00119794	0.00087905	7.65656565656566e-08	0.0100503	0.7	268	268.5	267.5	Constant load
Montagnat et al (2015)	0.00105067	0.00119794	0.00087905	9.84848484848485e-08	0.0100503	0.8	268	268.5	267.5	Constant load
Montagnat et al (2015)	0.00105067	0.00119794	0.00087905	9.47613268608414e-08	0.0112632	0.75	268	268.5	267.5	Constant load
Montagnat et al (2015)	0.00105067	0.00119794	0.00087905	8.21641263752902e-08	0.00934352	0.7	268	268.5	267.5	Constant load
Montagnat et al (2015)	0.00105067	0.00119794	0.00087905	1.62216624685139e-07	0.00752827	0.8	268	268.5	267.5	Constant load
Vaughan et al. (2017)	0.000343	0.0004459	0.0002401	1.01010101010101e-06	0.0100503	1.12	268.4	268.9	267.9	Constant displacement rate
Vaughan et al. (2017)	0.000343	0.0004459	0.0002401	1.00806451612903e-06	0.00803217	1.13	268.4	268.9	267.9	Constant displacement rate
Vaughan et al. (2017)	0.000343	0.0004459	0.0002401	1.10619469026549e-06	0.100926	1.22	268.04	268.54	267.54	Constant displacement rate
Vaughan et al. (2017)	0.000343	0.0004459	0.0002401	1.09529025191676e-06	0.0910194	1.17	268.02	268.52	267.52	Constant displacement rate
Vaughan et al. (2017)	0.000343	0.0004459	0.0002401	1.09289617486339e-06	0.0888312	1.2	268.17	268.67	267.67	Constant displacement rate
Qi et al. (2017)	0.00023	0.000299	0.000161	2.16e-06	0.0223	1.85	263.7	264.2	263.2	Constant displacement rate
Qi et al. (2017)	0.00023	0.000299	0.000161	0.000202	0.0258	8.09	263.3	263.8	262.8	Constant displacement rate
Qi et al. (2017)	0.00023	0.000299	0.000161	1.14e-05	0.0208	3.3	263.3	263.8	262.8	Constant displacement rate
Qi et al. (2017)	0.00023	0.000299	0.000161	4.6e-05	0.0229	5.42	263.2	263.7	262.7	Constant displacement rate
Qi et al. (2017)	0.00063	0.000819	0.000441	1.2e-06	0.0157	2.23	263.5	264	263	Constant displacement rate
Qi et al. (2017)	0.00063	0.000819	0.000441	3.81e-05	0.0146	6.17	263.4	263.9	262.9	Constant displacement rate
Qi et al. (2017)	0.00063	0.000819	0.000441	8.24e-05	0.0157	7.61	263.7	264.2	263.2	Constant displacement rate
Qi et al. (2017)	0.00063	0.000819	0.000441	1.02e-05	0.0174	4.01	263.7	264.2	263.2	Constant displacement rate
Qi et al. (2019)	0.00023	0.000299	0.000161	4.60725514813321e-05	0.0404145	1.50688	267.6	268.1	267.1	Constant displacement rate
Qi et al. (2019)	0.00023	0.000299	0.000161	6.23538290724796e-05	0.0750555	2.42487	267.4	267.9	266.9	Constant displacement rate
Qi et al. (2019)	0.00023	0.000299	0.000161	0.000102768	0.0519615	2.66736	267.4	267.9	266.9	Constant displacement rate
Qi et al. (2019)	0.00023	0.000299	0.000161	7.90969868789788e-05	0.057735	3.49874	267.8	268.3	267.3	Constant displacement rate
Qi et al. (2019)	0.00023	0.000299	0.000161	7.21687836487032e-05	0.092376	12.1763	242.5	243	242	Constant displacement rate
Qi et al. (2019)	0.00023	0.000299	0.000161	7.39008344562721e-05	0.092376	11.6567	243.1	243.6	242.6	Constant displacement rate
Qi et al. (2019)	0.00023	0.000299	0.000161	8.42931393016854e-05	0.057735	11.7953	242.4	242.9	241.9	Constant displacement rate
Qi et al. (2019)	0.00023	0.000299	0.000161	6.87046820335655e-05	0.0750555	7.96743	252.6	253.1	252.1	Constant displacement rate
Qi et al. (2019)	0.00023	0.000299	0.000161	5.47905405460955e-05	0.0288675	8.31384	252.9	253.4	252.4	Constant displacement rate
Fan et al. (2020)	0.000291	0.0003783	0.0002037	1.03e-05	0.02	1.78	263	263.5	262.5	Constant displacement rate
Fan et al. (2020)	0.000291	0.0003783	0.0002037	1.03e-05	0.01	2.92	263	263.5	262.5	Constant displacement rate
Fan et al. (2020)	0.000291	0.0003783	0.0002037	1.11e-05	0.02	2.54	263	263.5	262.5	Constant displacement rate
Fan et al. (2020)	0.000291	0.0003783	0.0002037	1.11e-05	0.03	2.85	263	263.5	262.5	Constant displacement rate
Fan et al. (2020)	0.000291	0.0003783	0.0002037	1.03e-05	0.02	2.13	263	263.5	262.5	Constant displacement rate
Fan et al. (2020)	0.000291	0.0003783	0.0002037	1.03e-05	0.02	4.33	253	253.5	252.5	Constant displacement rate
Fan et al. (2020)	0.000291	0.0003783	0.0002037	8.09e-06	0.02	4.88	253	253.5	252.5	Constant displacement rate
Fan et al. (2020)	0.000291	0.0003783	0.0002037	1.13e-05	0.04	3.64	253	253.5	252.5	Constant displacement rate
Fan et al. (2020)	0.000291	0.0003783	0.0002037	1.09e-05	0.03	4.69	253	253.5	252.5	Constant displacement rate
Fan et al. (2020)	0.000291	0.0003783	0.0002037	1.1e-05	0.03	4.66	253	253.5	252.5	Constant displacement rate
Fan et al. (2020)	0.000291	0.0003783	0.0002037	1.08e-05	0.03	8.24	243	243.5	242.5	Constant displacement rate
Fan et al. (2020)	0.000291	0.0003783	0.0002037	1.07e-05	0.03	8.71	243	243.5	242.5	Constant displacement rate
Fan et al. (2020)	0.000291	0.0003783	0.0002037	1.03e-05	0.03	8.93	243	243.5	242.5	Constant displacement rate
Fan et al. (2020)	0.000291	0.0003783	0.0002037	1.11e-05	0.03	7.6	243	243.5	242.5	Constant displacement rate
Fan et al. (2020)	0.000291	0.0003783	0.0002037	1.1e-05	0.02	7.82	243	243.5	242.5	Constant displacement rate
Fan et al. (2021a)	0.000545	0.0007085	0.0003815	1.11e-06	0.01	1.02	269	269.5	268.5	Constant load
Fan et al. (2021a)	0.000545	0.0007085	0.0003815	7.6e-07	0.02	1.01	269	269.5	268.5	Constant load
Fan et al. (2021a)	0.000545	0.0007085	0.0003815	6.54e-07	0.02	1.01	269	269.5	268.5	Constant load
Fan et al. (2021a)	0.000545	0.0007085	0.0003815	9.74e-07	0.02	1.01	269	269.5	268.5	Constant load
Fan et al. (2021a)	0.000545	0.0007085	0.0003815	9.43e-07	0.02	1.01	269	269.5	268.5	Constant load
Fan et al. (2021a)	0.000545	0.0007085	0.0003815	8.44e-07	0.02	1.01	269	269.5	268.5	Constant load
Fan et al. (2021a)	0.000545	0.0007085	0.0003815	8.41e-07	0.02	1.01	269	269.5	268.5	Constant load
Unpublished	0.000291	0.0003783	0.0002037	2.8e-05	0.0246	8.44	243	243.5	242.5	Constant displacement rate
Unpublished	0.000291	0.0003783	0.0002037	2.8e-05	0.0241	8.8	243	243.5	242.5	Constant displacement rate
Unpublished	0.000291	0.0003783	0.0002037	2.7e-05	0.0266	9.09	243	243.5	242.5	Constant displacement rate
Unpublished	0.000291	0.0003783	0.0002037	5.6e-05	0.0289	10.92	243	243.5	242.5	Constant displacement rate
Fan et al. (2021a, 2021b)	0.000291	0.0003783	0.0002037	5.4e-05	0.0274	11.29	243	243.5	242.5	Constant displacement rate
Fan et al. (2021a, 2021b)	0.000291	0.0003783	0.0002037	5.4e-05	0.0298	10.63	243	243.5	242.5	Constant displacement rate
Fan et al. (2021c)	0.001293	0.0016809	0.0009051	1e-05	0.018	8.82	243	243.5	242.5	Constant displacement rate
Fan et al. (2021c)	0.001293	0.0016809	0.0009051	1.1e-05	0.0152	8.27	243	243.5	242.5	Constant displacement rate
Fan et al. (2021c)	0.001293	0.0016809	0.0009051	1.1e-05	0.0326	8.98	243	243.5	242.5	Constant displacement rate
Fan et al. (2021c)	0.001293	0.0016809	0.0009051	2.8e-05	0.0186	10.54	243	243.5	242.5	Constant displacement rate
Fan et al. (2021c)	0.001293	0.0016809	0.0009051	2.8e-05	0.0226	10.78	243	243.5	242.5	Constant displacement rate
Fan et al. (2021c)	0.001293	0.0016809	0.0009051	2.6e-05	0.0239	10.3	243	243.5	242.5	Constant displacement rate
Fan et al. (2021c)	0.001293	0.0016809	0.0009051	5.4e-05	0.0189	12.37	243	243.5	242.5	Constant displacement rate
Fan et al. (2021c)	0.001293	0.0016809	0.0009051	5.6e-05	0.0257	12.1	243	243.5	242.5	Constant displacement rate
Fan et al. (2021c)	0.001293	0.0016809	0.0009051	5.4e-05	0.0226	12.83	243	243.5	242.5	Constant displacement rate
Qi & Goldsby (2021)	0.00023	0.000299	0.000161	4e-05	0.02	4.95	263.4	263.9	262.9	Constant displacement rate
Qi & Goldsby (2021)	0.00023	0.000299	0.000161	0.000457	0.02	8.96	263.4	263.9	262.9	Constant displacement rate
Qi & Goldsby (2021)	0.00023	0.000299	0.000161	0.000103	0.02	6.84	263.4	263.9	262.9	Constant displacement rate
Qi & Goldsby (2021)	0.00023	0.000299	0.000161	0.000159	0.02	7.19	263.4	263.9	262.9	Constant displacement rate
Qi & Goldsby (2021)	0.00023	0.000299	0.000161	3.49e-05	0.02	4.94	263.4	263.9	262.9	Constant displacement rate
Qi & Goldsby (2021)	0.00023	0.000299	0.000161	0.000326	0.02	9.12	263.4	263.9	262.9	Constant displacement rate
Qi & Goldsby (2021)	0.00023	0.000299	0.000161	9.55e-05	0.02	6.25	263.4	263.9	262.9	Constant displacement rate
Qi & Goldsby (2021)	0.00023	0.000299	0.000161	0.000169	0.02	8.03	263.4	263.9	262.9	Constant displacement rate
Qi & Goldsby (2021)	0.00023	0.000299	0.000161	4e-04	0.02	9.83	263.4	263.9	262.9	Constant displacement rate
Qi & Goldsby (2021)	0.00023	0.000299	0.000161	9.59e-05	0.02	7.11	263.4	263.9	262.9	Constant displacement rate
Qi & Goldsby (2021)	0.00023	0.000299	0.000161	0.000314	0.02	9.44	263.4	263.9	262.9	Constant displacement rate
Qi & Goldsby (2021)	0.00023	0.000299	0.000161	0.000489	0.02	10.45	263.4	263.9	262.9	Constant displacement rate
Qi & Goldsby (2021)	0.00023	0.000299	0.000161	8e-05	0.02	6.32	263.4	263.9	262.9	Constant displacement rate
Qi & Goldsby (2021)	0.00023	0.000299	0.000161	2.53e-05	0.02	4.49	263.4	263.9	262.9	Constant displacement rate
Qi & Goldsby (2021)	0.00023	0.000299	0.000161	3.95e-05	0.02	4.87	263.4	263.9	262.9	Constant displacement rate
Qi & Goldsby (2021)	0.00023	0.000299	0.000161	6e-05	0.02	6.36	263.4	263.9	262.9	Constant displacement rate
Qi & Goldsby (2021)	0.00063	0.000819	0.000441	0.000352	0.02	10.89	263.4	263.9	262.9	Constant displacement rate
Qi & Goldsby (2021)	0.00063	0.000819	0.000441	3.1e-05	0.02	5.57	263.4	263.9	262.9	Constant displacement rate
Qi & Goldsby (2021)	0.00063	0.000819	0.000441	3.1e-05	0.02	5.57	263.4	263.9	262.9	Constant displacement rate
Qi & Goldsby (2021)	0.00063	0.000819	0.000441	3.1e-05	0.02	5.57	263.4	263.9	262.9	Constant displacement rate
Qi & Goldsby (2021)	0.00063	0.000819	0.000441	3.1e-05	0.02	5.57	263.4	263.9	262.9	Constant displacement rate
Qi & Goldsby (2021)	0.00063	0.000819	0.000441	3.1e-05	0.02	5.57	263.4	263.9	262.9	Constant displacement rate
Qi & Goldsby (2021)	0.00063	0.000819	0.000441	3.1e-05	0.02	5.57	263.4	263.9	262.9	Constant displacement rate
Qi & Goldsby (2021)	0.00063	0.000819	0.000441	3.1e-05	0.02	5.57	263.4	263.9	262.9	Constant displacement rate
Qi & Goldsby (2021)	0.00063	0.000819	0.000441	3.1e-05	0.02	5.57	263.4	263.9	262.9	Constant displacement rate
Qi & Goldsby (2021)	0.00063	0.000819	0.000441	3.1e-05	0.02	5.57	263.4	263.9	262.9	Constant displacement rate
Qi & Goldsby (2021)	0.00063	0.000819	0.000441	3.1e-05	0.02	5.57	263.4	263.9	262.9	Constant displacement rate
Qi & Goldsby (2021)	0.00063	0.000819	0.000441	3.1e-05	0.02	5.57	263.4	263.9	262.9	Constant displacement rate
Qi & Goldsby (2021)	0.00063	0.000819	0.000441	3.1e-05	0.02	5.57	263.4	263.9	262.9	Constant displacement rate
Qi & Goldsby (2021)	0.00063	0.000819	0.000441	3.1e-05	0.02	5.57	263.4	263.9	262.9	Constant displacement rate
Qi & Goldsby (2021)	0.00063	0.000819	0.000441	3.1e-05	0.02	5.57	263.4	263.9	262.9	Constant displacement rate
Qi & Goldsby (2021)	0.00063	0.000819	0.000441	3.1e-05	0.02	5.57	263.4	263.9	262.9	Constant displacement rate
Qi & Goldsby (2021)	0.00063	0.000819	0.000441	3.1e-05	0.02	5.57	263.4	263.9	262.9	Constant displacement rate
Qi & Goldsby (2021)	0.00063	0.000819	0.000441	3.1e-05	0.02	5.57	263.4	263.9	262.9	Constant displacement rate
Qi & Goldsby (2021)	0.00063	0.000819	0.000441	3.1e-05	0.02	5.57	263.4	263.9	262.9	Constant displacement rate
Qi & Goldsby (2021)	0.00063	0.000819	0.000441	3.1e-05	0.02	5.57	263.4	263.9	262.9	Constant displacement rate
Qi & Goldsby (2021)	0.00063	0.000819	0.000441	3.1e-05	0.02	5.57	263.4	263.9	262.9	Constant displacement rate
Qi & Goldsby (2021)	0.00063	0.000819	0.000441	3.1e-05	0.02	5.57	263.4	263.9	262.9	Constant displacement rate
Qi & Goldsby (2021)	0.00063	0.000819	0.000441	3.1e-05	0.02	5.57	263.4	263.9	262.9	Constant displacement rate
Qi & Goldsby (2021)	0.00063	0.000819	0.000441	3.1e-05	0.02	5.57	263.4	263.9	262.9	Constant displacement rate
Qi & Goldsby (2021)	0.00063	0.000819	0.000441	3.1e-05	0.02	5.57	263.4	263.9	262.9	Constant displacement rate
Qi & Goldsby (2021)	0.00063	0.000819	0.000441	3.1e-05	0.02	5.57	263.4	263.9	262.9	Constant displacement rate
Qi & Goldsby (2021)	0.00063	0.000819	0.000441	3.1e-05	0.02	5.57	263.4	263.9	262.9	Constant displacement rate
Qi & Goldsby (2021)	0.00063	0.000819	0.000441	3.1e-05	0.02	5.57	263.4	263.9	262.9	Constant displacement rate
Qi & Goldsby (2021)	0.00063	0.000819	0.000441	3.1e-05	0.02	5.57	263.4	263.9	262.9	Constant displacement rate
Qi & Goldsby (2021)	0.00063	0.000819	0.000441	3.1e-05	0.02	5.57	263.4	263.9	262.9	Constant displacement rate
Qi & Goldsby (2021)	0.00063	0.000819	0.000441	3.1e-05	0.02	5.57	263.4	263.9	262.9	Constant displacement rate
Qi & Goldsby (2021)	0.00063	0.000819	0.000441	3.1e-05	0.02	5.57	263.4	263.9	262.9	Constant displacement rate
Qi & Goldsby (2021)	0.00063	0.000819	0.000441	3.1e-05	0.02	5.57	263.4	263.9	262.9	Constant displacement rate
Qi & Goldsby (2021)	0.00063	0.000819	0.000441	3.1e-05	0.02	5.57	263.4	263.9	262.9	Constant displacement rate
Qi & Goldsby (2021)	0.00063	0.000819	0.000441	3.1e-05	0.02	5.57	263.4	263.9	262.9	Constant displacement rate
Qi & Goldsby (2021)	0.00063	0.000819	0.000441	3.1e-05	0.02	5.57	263.4	263.9	262.9	Constant displacement rate
Qi & Goldsby (2021)	0.00063	0.000819	0.000441	3.1e-05	0.02	5.57	263.4	263.9	262.9	Constant displacement rate
Qi & Goldsby (2021)	0.00063	0.000819	0.000441	3.1e-05	0.02	5.57	263.4	263.9	262.9	Constant displacement rate
Qi & Goldsby (2021)	0.00063	0.000819	0.000441	3.1e-05	0.02	5.57	263.4	263.9	262.9	Constant displacement rate
Qi & Goldsby (2021)	0.00063	0.000819	0.000441	3.1e-05	0.02	5.57	263.4	263.9	262.9	Constant displacement rate
Qi & Goldsby (2021)	0.00063	0.000819	0.000441	3.1e-05	0.02	5.57	263.4	263.9	262.9	Constant displacement rate
Qi & Goldsby (2021)	0.00063	0.000819	0.000441	3.1e-05	0.02	5.57	263.4	263.9	262.9	Constant displacement rate
Qi & Goldsby (2021)	0.00063	0.000819	0.000441	3.1e-05	0.02	5.57	263.4	263.9	262.9	Constant displacement rate
Qi & Goldsby (2021)	0.00063	0.000819	0.000441	3.1e-05	0.02	5.57	263.4	263.9	262.9	Constant displacement rate
Qi & Goldsby (2021)	0.00063	0.000819	0.000441	3.1e-05	0.02	5.57	263.4	263.9	262.9	Constant displacement rate
Qi & Goldsby (2021)	0.00063	0.000819	0.000441	3.1e-05	0.02	5.57	263.4	263.9	262.9	Constant displacement rate
Qi & Goldsby (2021)	0.00063	0.000819	0.000441	3.1e-05	0.02	5.57	263.4	263.9	262.9	Constant displacement rate
Qi & Goldsby (2021)	0.00063	0.000819	0.000441	3.1e-05	0.02	5.57	263.4	263.9	262.9	Constant displacement rate
Qi & Goldsby (2021)	0.00063	0.000819	0.000441	3.1e-05	0.02	5.57	263.4	263.9	262.9	Constant displacement rate
Qi & Goldsby (2021)	0.00063	0.000819	0.000441	3.1e-05	0.02	5.57	263.4	263.9	262.9	Constant displacement rate

## Sheet: Supplementary Table 5
Source	GS_ini_mean	GS_ini_upper	GS_ini_lower	rate_c	strain_c	stress_c	T_mean	T_upper	T_lower	exp_type
Durham et al. (1983)	0.0015	0.00195	0.00105	0.00035	0.15	12.8	243	243.5	242.5	Constant displacement rate
Durham et al. (1983)	0.0015	0.00195	0.00105	0.00035	0.15	11.9	243	243.5	242.5	Constant displacement rate
Durham et al. (1983)	0.0015	0.00195	0.00105	3.5e-06	0.15	4.1	244	244.5	243.5	Constant displacement rate
Durham et al. (1983)	0.0015	0.00195	0.00105	0.00035	0.15	12.9	244	244.5	243.5	Constant displacement rate
Durham et al. (1983)	0.0015	0.00195	0.00105	3.5e-05	0.15	6.6	244	244.5	243.5	Constant displacement rate
Durham et al. (1983)	0.0015	0.00195	0.00105	3.5e-05	0.15	7.1	244	244.5	243.5	Constant displacement rate
Durham et al. (1983)	0.0015	0.00195	0.00105	0.00035	0.15	7	258	258.5	257.5	Constant displacement rate
Durham et al. (1983)	0.0015	0.00195	0.00105	0.00035	0.15	6.5	258	258.5	257.5	Constant displacement rate
Durham et al. (1983)	0.0015	0.00195	0.00105	3.5e-05	0.15	3.7	258	258.5	257.5	Constant displacement rate
Durham et al. (1983)	0.0015	0.00195	0.00105	0.00035	0.15	6.9	258	258.5	257.5	Constant displacement rate
Durham et al. (1983)	0.0015	0.00195	0.00105	0.00035	0.15	5.8	258	258.5	257.5	Constant displacement rate
Jacka (1984b)	0.0045	0.00585	0.00315	1.05916930230999e-07	0.113342	0.636396	266	266.5	265.5	Constant load
Jacka (1984b)	0.004	0.0052	0.0028	1.22591431201643e-07	0.0910958	0.636396	266	266.5	265.5	Constant load
Jacka (1984b)	0.0025	0.00325	0.00175	2.10497336304616e-07	0.131315	0.636396	266	266.5	265.5	Constant load
Jacka (1984b)	0.0022	0.00286	0.00154	1.19550592681668e-07	0.146399	0.636396	266	266.5	265.5	Constant load
Jacka (1984b)	0.0015	0.00195	0.00105	1.05986724225456e-07	0.114835	0.636396	266	266.5	265.5	Constant load
Jacka (1984b)	0.0045	0.00585	0.00315	3.28409568022538e-08	0.114835	0.551543	263	263.5	262.5	Constant load
Jacka (1984b)	0.004	0.0052	0.0028	3.27328007573518e-08	0.107388	0.551543	263	263.5	262.5	Constant load
Jacka (1984b)	0.0022	0.00286	0.00154	2.42127782646416e-08	0.146399	0.551543	263	263.5	262.5	Constant load
Jacka (1984b)	0.0015	0.00195	0.00105	2.26994796231015e-08	0.146399	0.551543	263	263.5	262.5	Constant load
Jacka (1984b)	0.0045	0.00585	0.00315	5.56314388805057e-07	0.131315	1.06066	264	264.5	263.5	Constant load
Jacka (1984b)	0.0025	0.00325	0.00175	3.78324660385025e-07	0.146399	1.06066	264	264.5	263.5	Constant load
Jacka (1984b)	0.0022	0.00286	0.00154	3.60852576522199e-07	0.131315	1.06066	264	264.5	263.5	Constant load
Jacka (1984b)	0.0015	0.00195	0.00105	6.01420960870332e-07	0.131315	1.06066	264	264.5	263.5	Constant load
Jacka & Maccagnan (1984)	0.0022	0.00286	0.00154	5.97e-08	0.33	0.2	270	270.5	269.5	Constant stress
Gao & Jacka (1987)	7e-04	0.00091	0.00049	5.11823293726589e-08	0.147913	0.424264	269.7	270.2	269.2	Constant stress
Jacka & Li (1994)	0.00123608	0.00140935	0.00103418	7e-09	0.15	0.2	263	263.5	262.5	Constant stress
Jacka & Li (1994)	0.00123608	0.00140935	0.00103418	4.8e-08	0.15	0.3	263	263.5	262.5	Constant stress
Jacka & Li (1994)	0.00123608	0.00140935	0.00103418	9.8e-08	0.15	0.4	263	263.5	262.5	Constant stress
Jacka & Li (1994)	0.00123608	0.00140935	0.00103418	2e-07	0.15	0.5	263	263.5	262.5	Constant stress
Jacka & Li (1994)	0.00123608	0.00140935	0.00103418	3.8e-07	0.15	0.6	263	263.5	262.5	Constant stress
Jacka & Li (1994)	0.0027175	0.00309842	0.00227362	2.9e-08	0.15	0.3	263	263.5	262.5	Constant stress
Jacka & Li (1994)	0.0027175	0.00309842	0.00227362	7.2e-08	0.15	0.4	263	263.5	262.5	Constant stress
Jacka & Li (1994)	0.0027175	0.00309842	0.00227362	3.5e-08	0.15	0.6	263	263.5	262.5	Constant stress
Jacka & Li (1994)	0.0027175	0.00309842	0.00227362	1.1e-08	0.15	0.8	263	263.5	262.5	Constant stress
Jacka & Li (1994)	0.0027175	0.00309842	0.00227362	3.6e-08	0.15	1	263	263.5	262.5	Constant stress
Jacka & Li (1994)	0.00123608	0.00140935	0.00103418	6e-08	0.15	0.2	268	268.5	267.5	Constant stress
Jacka & Li (1994)	0.00123608	0.00140935	0.00103418	3.3e-07	0.15	0.4	268	268.5	267.5	Constant stress
Jacka & Li (1994)	0.00123608	0.00140935	0.00103418	1.4e-06	0.15	0.6	268	268.5	267.5	Constant stress
Jacka & Li (1994)	0.00123608	0.00140935	0.00103418	5.6e-06	0.15	0.8	268	268.5	267.5	Constant stress
Jacka & Li (1994)	0.00123608	0.00140935	0.00103418	1.3e-05	0.15	1	268	268.5	267.5	Constant stress
Jacka & Li (1994)	0.00159577	0.00181946	0.00133512	6.67e-08	0.15	0.25	268	268.5	267.5	Constant stress
Jacka & Li (1994)	0.00159577	0.00181946	0.00133512	6.42e-08	0.15	0.25	268	268.5	267.5	Constant stress
Jacka & Li (1994)	0.00159577	0.00181946	0.00133512	6.79e-08	0.15	0.25	268	268.5	267.5	Constant stress
Jacka & Li (1994)	0.00123608	0.00140935	0.00103418	1.1e-07	0.15	0.2	270	270.5	269.5	Constant stress
Jacka & Li (1994)	0.00123608	0.00140935	0.00103418	2.2e-07	0.15	0.3	270	270.5	269.5	Constant stress
Jacka & Li (1994)	0.00123608	0.00140935	0.00103418	6.4e-07	0.15	0.4	270	270.5	269.5	Constant stress
Jacka & Li (1994)	0.00123608	0.00140935	0.00103418	1.1e-06	0.15	0.5	270	270.5	269.5	Constant stress
Jacka & Li (1994)	0.00123608	0.00140935	0.00103418	2.6e-06	0.15	0.6	270	270.5	269.5	Constant stress
Jacka & Li (1994)	0.00123608	0.00140935	0.00103418	8.8e-06	0.15	0.8	270	270.5	269.5	Constant stress
Jacka & Li (2000)	0.0017	0.00221	0.00119	5.14521538123634e-08	0.146399	0.424264	268	268.5	267.5	Constant stress
Jacka & Li (2000)	0.0017	0.00221	0.00119	9.98777103416467e-09	0.146399	0.424264	263	263.5	262.5	Constant stress
Jacka & Li (2000)	0.0017	0.00221	0.00119	5.02585137293849e-09	0.16158	0.424264	258	258.5	257.5	Constant stress
Jacka & Li (2000)	0.0017	0.00221	0.00119	2.11861809815614e-08	0.146399	0.636396	258	258.5	257.5	Constant stress
Jacka & Li (2000)	0.0017	0.00221	0.00119	5.48274695229654e-08	0.16158	0.848528	258	258.5	257.5	Constant stress
Jacka & Li (2000)	0.0017	0.00221	0.00119	1.14223894839511e-07	0.16158	1.06066	258	258.5	257.5	Constant stress
Jacka & Li (2000)	0.0017	0.00221	0.00119	1.92908938109367e-09	0.10145	0.424264	254	254.5	253.5	Constant stress
Jacka & Li (2000)	0.0017	0.00221	0.00119	1.03102361647217e-08	0.150943	0.636396	254	254.5	253.5	Constant stress
Jacka & Li (2000)	0.0017	0.00221	0.00119	2.72393755477218e-08	0.146399	0.848528	254	254.5	253.5	Constant stress
Jacka & Li (2000)	0.0017	0.00221	0.00119	3.18811465326174e-07	0.153977	1.06066	254	254.5	253.5	Constant stress
Jacka & Li (2000)	0.0017	0.00221	0.00119	3.48728576159706e-08	0.150943	1.16673	252	252.5	251.5	Constant stress
Piazolo et al. (2013)	0.000495	0.0006435	0.0003465	6.66666666666667e-07	0.105361	0.99	266	266.5	265.5	Constant displacement rate
Piazolo et al. (2013)	0.000495	0.0006435	0.0003465	2.77777777777778e-06	0.105361	1.43	266	266.5	265.5	Constant displacement rate
Piazolo et al. (2013)	0.000495	0.0006435	0.0003465	1.25e-05	0.223144	1.9	266	266.5	265.5	Constant displacement rate
Montagnat et al (2015)	0.00105067	0.00119794	0.00087905	4.4124218051832e-07	0.110708	0.75	268	268.5	267.5	Constant load
Montagnat et al (2015)	0.00105067	0.00119794	0.00087905	5.12336074683263e-07	0.105583	0.7	268	268.5	267.5	Constant load
Montagnat et al (2015)	0.00105067	0.00119794	0.00087905	6.47570218457423e-07	0.108476	0.8	268	268.5	267.5	Constant load
Qi et al. (2017)	0.00023	0.000299	0.000161	2.31e-06	0.21	1.3	263.7	264.2	263.2	Constant displacement rate
Qi et al. (2017)	0.00023	0.000299	0.000161	0.000242	0.22	4.31	263.3	263.8	262.8	Constant displacement rate
Qi et al. (2017)	0.00023	0.000299	0.000161	1.35e-05	0.13	2.18	263.3	263.8	262.8	Constant displacement rate
Qi et al. (2017)	0.00023	0.000299	0.000161	5.02e-05	0.19	3.02	263.2	263.7	262.7	Constant displacement rate
Qi et al. (2017)	0.00063	0.000819	0.000441	1.18e-06	0.18	1.17	263.5	264	263	Constant displacement rate
Qi et al. (2017)	0.00063	0.000819	0.000441	4.4e-05	0.23	2.94	263.4	263.9	262.9	Constant displacement rate
Qi et al. (2017)	0.00063	0.000819	0.000441	9.05e-05	0.23	3.49	263.7	264.2	263.2	Constant displacement rate
Qi et al. (2017)	0.00063	0.000819	0.000441	1.13e-05	0.23	1.94	263.7	264.2	263.2	Constant displacement rate
Qi et al. (2019)	0.00023	0.000299	0.000161	7.90969868789788e-05	0.866025	2.30363	267.8	268.3	267.3	Constant displacement rate
Qi et al. (2019)	0.00023	0.000299	0.000161	7.21687836487032e-05	1.50111	9.52628	242.5	243	242	Constant displacement rate
Qi et al. (2019)	0.00023	0.000299	0.000161	7.39008344562721e-05	0.80829	8.48705	243.1	243.6	242.6	Constant displacement rate
Qi et al. (2019)	0.00023	0.000299	0.000161	6.87046820335655e-05	1.27017	4.67654	252.6	253.1	252.1	Constant displacement rate
Qi et al. (2019)	0.00023	0.000299	0.000161	5.47905405460955e-05	0.635085	4.46869	252.9	253.4	252.4	Constant displacement rate
Fan et al. (2020)	0.000291	0.0003783	0.0002037	1.22e-05	0.19	1.33	263	263.5	262.5	Constant displacement rate
Fan et al. (2020)	0.000291	0.0003783	0.0002037	1.28e-05	0.2	2.93	253	253.5	252.5	Constant displacement rate
Fan et al. (2020)	0.000291	0.0003783	0.0002037	1.31e-05	0.21	5	243	243.5	242.5	Constant displacement rate
Fan et al. (2021a)	0.000545	0.0007085	0.0003815	1.22e-06	0.13	0.9	269	269.5	268.5	Constant load
Fan et al. (2021a)	0.000545	0.0007085	0.0003815	1.58e-06	0.13	0.9	269	269.5	268.5	Constant load
Fan et al. (2021a)	0.000545	0.0007085	0.0003815	1.67e-06	0.13	0.9	269	269.5	268.5	Constant load
Fan et al. (2021a)	0.000545	0.0007085	0.0003815	1.48e-06	0.13	0.9	269	269.5	268.5	Constant load
Fan et al. (2021a)	0.000545	0.0007085	0.0003815	1.57e-06	0.13	0.9	269	269.5	268.5	Constant load
Unpublished	0.000291	0.0003783	0.0002037	3.3e-05	0.2298	5.42	243	243.5	242.5	Constant displacement rate
Fan et al. (2021a, 2021b)	0.000291	0.0003783	0.0002037	6.7e-05	0.2403	7.35	243	243.5	242.5	Constant displacement rate
Fan et al. (2021c)	0.001293	0.0016809	0.0009051	1.2e-05	0.1	5.13	243	243.5	242.5	Constant displacement rate
Fan et al. (2021c)	0.001293	0.0016809	0.0009051	1.3e-05	0.2263	4.67	243	243.5	242.5	Constant displacement rate
Fan et al. (2021c)	0.001293	0.0016809	0.0009051	3e-05	0.1	6.27	243	243.5	242.5	Constant displacement rate
Fan et al. (2021c)	0.001293	0.0016809	0.0009051	3.2e-05	0.2282	5.87	243	243.5	242.5	Constant displacement rate
Fan et al. (2021c)	0.001293	0.0016809	0.0009051	6e-05	0.1	7.03	243	243.5	242.5	Constant displacement rate
Fan et al. (2021c)	0.001293	0.0016809	0.0009051	6.6e-05	0.2325	7.65	243	243.5	242.5	Constant displacement rate
Qi & Goldsby (2021)	0.00023	0.000299	0.000161	4.03e-05	0.2	3.1	263.4	263.9	262.9	Constant displacement rate
Qi & Goldsby (2021)	0.00023	0.000299	0.000161	0.000471	0.25	4.9	263.4	263.9	262.9	Constant displacement rate
Qi & Goldsby (2021)	0.00023	0.000299	0.000161	0.000105	0.18	3.85	263.4	263.9	262.9	Constant displacement rate
Qi & Goldsby (2021)	0.00023	0.000299	0.000161	0.000176	0.26	4.04	263.4	263.9	262.9	Constant displacement rate
Qi & Goldsby (2021)	0.00023	0.000299	0.000161	4.54e-05	0.19	2.84	263.4	263.9	262.9	Constant displacement rate
Qi & Goldsby (2021)	0.00023	0.000299	0.000161	0.000328	0.19	4.75	263.4	263.9	262.9	Constant displacement rate
Qi & Goldsby (2021)	0.00023	0.000299	0.000161	0.000107	0.24	3.29	263.4	263.9	262.9	Constant displacement rate
Qi & Goldsby (2021)	0.00023	0.000299	0.000161	0.000176	0.22	3.88	263.4	263.9	262.9	Constant displacement rate
Qi & Goldsby (2021)	0.00023	0.000299	0.000161	0.000427	0.22	4.85	263.4	263.9	262.9	Constant displacement rate
Qi & Goldsby (2021)	0.00023	0.000299	0.000161	9.17e-05	0.15	3.73	263.4	263.9	262.9	Constant displacement rate
Qi & Goldsby (2021)	0.00023	0.000299	0.000161	0.000327	0.2	4.64	263.4	263.9	262.9	Constant displacement rate
Qi & Goldsby (2021)	0.00023	0.000299	0.000161	0.000484	0.18	5.34	263.4	263.9	262.9	Constant displacement rate
Qi & Goldsby (2021)	0.00023	0.000299	0.000161	8.33e-05	0.17	3.46	263.4	263.9	262.9	Constant displacement rate
Qi & Goldsby (2021)	0.00023	0.000299	0.000161	2.51e-05	0.21	2.3	263.4	263.9	262.9	Constant displacement rate
Qi & Goldsby (2021)	0.00023	0.000299	0.000161	4.22e-05	0.2	2.6	263.4	263.9	262.9	Constant displacement rate
Qi & Goldsby (2021)	0.00023	0.000299	0.000161	7.66e-05	0.22	3.02	263.4	263.9	262.9	Constant displacement rate
Qi & Goldsby (2021)	0.00063	0.000819	0.000441	0.000391	0.27	5	263.4	263.9	262.9	Constant displacement rate
Qi & Goldsby (2021)	0.00063	0.000819	0.000441	3.37e-05	0.17	2.7	263.4	263.9	262.9	Constant displacement rate
Qi & Goldsby (2021)	0.00063	0.000819	0.000441	3.37e-05	0.17	2.7	263.4	263.9	262.9	Constant displacement rate
Qi & Goldsby (2021)	0.00063	0.000819	0.000441	3.37e-05	0.17	2.7	263.4	263.9	262.9	Constant displacement rate
Qi & Goldsby (2021)	0.00063	0.000819	0.000441	3.37e-05	0.17	2.7	263.4	263.9	262.9	Constant displacement rate
Qi & Goldsby (2021)	0.00063	0.000819	0.000441	3.37e-05	0.17	2.7	263.4	263.9	262.9	Constant displacement rate
Qi & Goldsby (2021)	0.00063	0.000819	0.000441	3.37e-05	0.17	2.7	263.4	263.9	262.9	Constant displacement rate
Qi & Goldsby (2021)	0.00063	0.000819	0.000441	3.37e-05	0.17	2.7	263.4	263.9	262.9	Constant displacement rate
Qi & Goldsby (2021)	0.00063	0.000819	0.000441	3.37e-05	0.17	2.7	263.4	263.9	262.9	Constant displacement rate
Qi & Goldsby (2021)	0.00063	0.000819	0.000441	3.37e-05	0.17	2.7	263.4	263.9	262.9	Constant displacement rate
Qi & Goldsby (2021)	0.00063	0.000819	0.000441	3.37e-05	0.17	2.7	263.4	263.9	262.9	Constant displacement rate
Qi & Goldsby (2021)	0.00063	0.000819	0.000441	3.37e-05	0.17	2.7	263.4	263.9	262.9	Constant displacement rate
Qi & Goldsby (2021)	0.00063	0.000819	0.000441	3.37e-05	0.17	2.7	263.4	263.9	262.9	Constant displacement rate
Qi & Goldsby (2021)	0.00063	0.000819	0.000441	3.37e-05	0.17	2.7	263.4	263.9	262.9	Constant displacement rate
Qi & Goldsby (2021)	0.00063	0.000819	0.000441	3.37e-05	0.17	2.7	263.4	263.9	262.9	Constant displacement rate
Qi & Goldsby (2021)	0.00063	0.000819	0.000441	3.37e-05	0.17	2.7	263.4	263.9	262.9	Constant displacement rate
Qi & Goldsby (2021)	0.00063	0.000819	0.000441	3.37e-05	0.17	2.7	263.4	263.9	262.9	Constant displacement rate
Qi & Goldsby (2021)	0.00063	0.000819	0.000441	3.37e-05	0.17	2.7	263.4	263.9	262.9	Constant displacement rate
Qi & Goldsby (2021)	0.00063	0.000819	0.000441	3.37e-05	0.17	2.7	263.4	263.9	262.9	Constant displacement rate
Qi & Goldsby (2021)	0.00063	0.000819	0.000441	3.37e-05	0.17	2.7	263.4	263.9	262.9	Constant displacement rate
Qi & Goldsby (2021)	0.00063	0.000819	0.000441	3.37e-05	0.17	2.7	263.4	263.9	262.9	Constant displacement rate
Qi & Goldsby (2021)	0.00063	0.000819	0.000441	3.37e-05	0.17	2.7	263.4	263.9	262.9	Constant displacement rate
Qi & Goldsby (2021)	0.00063	0.000819	0.000441	3.37e-05	0.17	2.7	263.4	263.9	262.9	Constant displacement rate
Qi & Goldsby (2021)	0.00063	0.000819	0.000441	3.37e-05	0.17	2.7	263.4	263.9	262.9	Constant displacement rate
Qi & Goldsby (2021)	0.00063	0.000819	0.000441	3.37e-05	0.17	2.7	263.4	263.9	262.9	Constant displacement rate
Qi & Goldsby (2021)	0.00063	0.000819	0.000441	3.37e-05	0.17	2.7	263.4	263.9	262.9	Constant displacement rate
Qi & Goldsby (2021)	0.00063	0.000819	0.000441	3.37e-05	0.17	2.7	263.4	263.9	262.9	Constant displacement rate
Qi & Goldsby (2021)	0.00063	0.000819	0.000441	3.37e-05	0.17	2.7	263.4	263.9	262.9	Constant displacement rate
Qi & Goldsby (2021)	0.00063	0.000819	0.000441	3.37e-05	0.17	2.7	263.4	263.9	262.9	Constant displacement rate
Qi & Goldsby (2021)	0.00063	0.000819	0.000441	3.37e-05	0.17	2.7	263.4	263.9	262.9	Constant displacement rate
Qi & Goldsby (2021)	0.00063	0.000819	0.000441	3.37e-05	0.17	2.7	263.4	263.9	262.9	Constant displacement rate
Qi & Goldsby (2021)	0.00063	0.000819	0.000441	3.37e-05	0.17	2.7	263.4	263.9	262.9	Constant displacement rate
Qi & Goldsby (2021)	0.00063	0.000819	0.000441	3.37e-05	0.17	2.7	263.4	263.9	262.9	Constant displacement rate
Qi & Goldsby (2021)	0.00063	0.000819	0.000441	3.37e-05	0.17	2.7	263.4	263.9	262.9	Constant displacement rate
Qi & Goldsby (2021)	0.00063	0.000819	0.000441	3.37e-05	0.17	2.7	263.4	263.9	262.9	Constant displacement rate
Qi & Goldsby (2021)	0.00063	0.000819	0.000441	3.37e-05	0.17	2.7	263.4	263.9	262.9	Constant displacement rate
Qi & Goldsby (2021)	0.00063	0.000819	0.000441	3.37e-05	0.17	2.7	263.4	263.9	262.9	Constant displacement rate
Qi & Goldsby (2021)	0.00063	0.000819	0.000441	3.37e-05	0.17	2.7	263.4	263.9	262.9	Constant displacement rate
Qi & Goldsby (2021)	0.00063	0.000819	0.000441	3.37e-05	0.17	2.7	263.4	263.9	262.9	Constant displacement rate
Qi & Goldsby (2021)	0.00063	0.000819	0.000441	3.37e-05	0.17	2.7	263.4	263.9	262.9	Constant displacement rate
Qi & Goldsby (2021)	0.00063	0.000819	0.000441	3.37e-05	0.17	2.7	263.4	263.9	262.9	Constant displacement rate
Qi & Goldsby (2021)	0.00063	0.000819	0.000441	3.37e-05	0.17	2.7	263.4	263.9	262.9	Constant displacement rate
Qi & Goldsby (2021)	0.00063	0.000819	0.000441	3.37e-05	0.17	2.7	263.4	263.9	262.9	Constant displacement rate
Qi & Goldsby (2021)	0.00063	0.000819	0.000441	3.37e-05	0.17	2.7	263.4	263.9	262.9	Constant displacement rate
Qi & Goldsby (2021)	0.00063	0.000819	0.000441	3.37e-05	0.17	2.7	263.4	263.9	262.9	Constant displacement rate
Qi & Goldsby (2021)	0.00063	0.000819	0.000441	3.37e-05	0.17	2.7	263.4	263.9	262.9	Constant displacement rate
Qi & Goldsby (2021)	0.00063	0.000819	0.000441	3.37e-05	0.17	2.7	263.4	263.9	262.9	Constant displacement rate
Qi & Goldsby (2021)	0.00063	0.000819	0.000441	3.37e-05	0.17	2.7	263.4	263.9	262.9	Constant displacement rate
Qi & Goldsby (2021)	0.00063	0.000819	0.000441	3.37e-05	0.17	2.7	263.4	263.9	262.9	Constant displacement rate
Qi & Goldsby (2021)	0.00063	0.000819	0.000441	3.37e-05	0.17	2.7	263.4	263.9	262.9	Constant displacement rate
