# Supplementary material for: Flow laws for ice constrained by seventy years of laboratory experiments
Source: Research Square preprint supplement (doi:10.21203/rs.3.rs-4809184/v1), 2025-02-26
Supplement: Supplementary file 4 [file Bayesian_low_strain_three_component.pdf › Supplement_code1/Bayesian_low_strain_three_component.pdf]

# Bayesian modelling - low strain, two component (3C): GSI+GSS1+GSS2

Dr Sheng Fan

2024-07-22

## 1. Libraries and Data

The following libraries are essential for the modelling and visualisation

- JAGS <https://sourceforge.net/projects/mcmc-jags/>
- R2jags <https://cran.r-project.org/web/packages/R2jags/index.html>
- lattice <https://cran.r-project.org/web/packages/lattice/index.html>
- ggplot2 <https://cran.r-project.org/web/packages/ggplot2/index.html>
- gridExtra <https://cran.r-project.org/web/packages/gridExtra/index.html>

```
# Import Libraries

library(R2jags)
library(lattice)
library(ggplot2)
library(gridExtra)

# Import data
file_path <- "D:\\Bayesian_modelling\\Input_data\\Supplement_S3_input_low_strain.csv"

data <- read.csv(file_path)

# Assignment of each column to a variable
Source <- data$Source
GS_ini_mean <- data$GS_ini_mean
GS_ini_upper <- data$GS_ini_upper
GS_ini_lower <- data$GS_ini_lower
rate_c <- data$rate_c
strain_c <- data$strain_c
stress_c <- data$stress_c
T_mean <- data$T_mean
T_upper <- data$T_upper
T_lower <- data$T_lower
exp_type <- data$exp_type
```

## 2. Bayesian Modelling

### 2.1 Set Bayesian modelling parameters and output dir

```
## Bayesian model parameters
# Iterations
n_iter <- 4000000
n_iter_str <- format (n_iter, scientific=FALSE)

# Burn-in
n_burnin <- 10000
n_burnin_str <- format (n_burnin, scientific=FALSE)

# Thinning
n_thin <- 20
n_thin_str <- format (n_thin, scientific=FALSE)

model <- "low_strain_three_component"
extension <- ".jags"
model_file <- paste0(model, extension)

## Output dir

strain_condition_input = "Low-strain"

law <- "Three-component"

# Get the current date
date_time_str <- format(Sys.time(), "%Y-%m-%d-%H-%M-%S")

# Create the folder name by concatenating the date and variable name
sub_folder_name <- paste(date_time_str, strain_condition_input, law, n_iter_str, n_burnin_str, n_thin_str)

# Create the folder under the master directory
new_dir <- file.path("D:\\Bayesian_modelling\\Results", sub_folder_name)

dir.create(new_dir)
```

### 2.2 Modelling

```
R <- 8.314*1e-3 #kJmol-1K-1

# number of observations
N <- length(stress_c)

rate_exp = log10(rate_c)

# model 0
data1 <- list("N"=N,
             "rate_exp" = rate_exp,
             "Stress"=stress_c,
```

```

        "R" = R,
        "Init_GS"=GS_ini_mean,
        "Init_GS_upper"=GS_ini_upper,
        "Init_GS_lower"=GS_ini_lower,
        "T_mean"=T_mean,
        "T_upper"=T_upper,
        "T_lower"=T_lower)

vinits <- function(){
  list("n_dis" = 4)
}

params <- c("n_GBS_warm", "n_GBS_cold","n_dis", "p_warm", "p_cold", "Q_dis","Q_GBS_warm","Q_GBS_cold",".

# Start modelling
s1 <- Sys.time()
m0 = jags(data=data1, inits = vinits, parameters.to.save=params, n.chains = 3,
          n.iter = n_iter,n.burnin=n_burnin,n.thin=n_thin,
          model.file=model_file)

```

```
## module glm loaded
```

```

## Compiling model graph
##   Resolving undeclared variables
##   Allocating nodes
## Graph information:
##   Observed stochastic nodes: 305
##   Unobserved stochastic nodes: 621
##   Total graph size: 8317
##
## Initializing model

```

```

s2 <- Sys.time()
s2-s1

```

```
## Time difference of 12.09502 hours
```

```
m0
```

```

## Inference for Bugs model at "low_strain_three_component.jags", fit using jags,
## 3 chains, each with 4e+06 iterations (first 10000 discarded), n.thin = 20
## n.sims = 598500 iterations saved
##
##           mu.vect sd.vect   2.5%    25%    50%    75%   97.5%  Rhat
## A_GBS_cold_log -0.946   0.737  -2.441  -1.429  -0.929  -0.443   0.455 1.001
## A_GBS_warm_log 22.820   2.006  19.077  21.426  22.750  24.154  26.909 1.001
## A_dis_log      5.020   1.008   2.935   4.372   5.057   5.704   6.905 1.001
## Q_GBS_cold     51.492   3.303  44.933  49.307  51.515  53.713  57.918 1.001
## Q_GBS_warm     182.296  9.997 162.613 175.523 182.305 189.125 201.741 1.001
## Q_dis          61.869  4.856  52.038  58.686  61.991  65.157  71.134 1.001
## n_GBS_cold     1.892   0.146   1.598   1.797   1.895   1.992   2.171 1.001
## n_GBS_warm     2.519   0.259   1.992   2.348   2.526   2.699   3.006 1.001
## n_dis          3.626   0.114   3.432   3.548   3.616   3.691   3.878 1.001

```

```
## p_cold      1.197  0.098  1.013  1.131  1.195  1.261  1.397 1.001
## p_warm      1.920  0.369  1.150  1.675  1.942  2.186  2.578 1.002
## deviance    -17.901  6.741 -30.210 -22.568 -18.229 -13.593 -3.740 1.001
##            n.eff
## A_GBS_cold_log 43000
## A_GBS_warm_log  6700
## A_dis_log      12000
## Q_GBS_cold     15000
## Q_GBS_warm      4700
## Q_dis          16000
## n_GBS_cold     84000
## n_GBS_warm      5300
## n_dis          17000
## p_cold         12000
## p_warm          2600
## deviance       110000
##
## For each parameter, n.eff is a crude measure of effective sample size,
## and Rhat is the potential scale reduction factor (at convergence, Rhat=1).
##
## DIC info (using the rule, pD = var(deviance)/2)
## pD = 22.7 and DIC = 4.8
## DIC is an estimate of expected predictive error (lower deviance is better).
```

```
m0.mcmc <- as.mcmc(m0)
```

```
# Document the summary of output
jags_output_path <- file.path(new_dir, "jags_output.txt")
sink(file = jags_output_path)

print(m0)
```

```
## Inference for Bugs model at "low_strain_three_component.jags", fit using jags,
## 3 chains, each with 4e+06 iterations (first 10000 discarded), n.thin = 20
## n.sims = 598500 iterations saved
##           mu.vect sd.vect  2.5%   25%   50%   75%  97.5% Rhat
## A_GBS_cold_log -0.946  0.737 -2.441 -1.429 -0.929 -0.443  0.455 1.001
## A_GBS_warm_log 22.820  2.006 19.077 21.426 22.750 24.154 26.909 1.001
## A_dis_log      5.020  1.008  2.935  4.372  5.057  5.704  6.905 1.001
## Q_GBS_cold     51.492  3.303 44.933 49.307 51.515 53.713 57.918 1.001
## Q_GBS_warm     182.296  9.997 162.613 175.523 182.305 189.125 201.741 1.001
## Q_dis         61.869  4.856 52.038 58.686 61.991 65.157 71.134 1.001
## n_GBS_cold     1.892  0.146  1.598  1.797  1.895  1.992  2.171 1.001
## n_GBS_warm      2.519  0.259  1.992  2.348  2.526  2.699  3.006 1.001
## n_dis          3.626  0.114  3.432  3.548  3.616  3.691  3.878 1.001
## p_cold         1.197  0.098  1.013  1.131  1.195  1.261  1.397 1.001
## p_warm         1.920  0.369  1.150  1.675  1.942  2.186  2.578 1.002
## deviance       -17.901  6.741 -30.210 -22.568 -18.229 -13.593 -3.740 1.001
##            n.eff
## A_GBS_cold_log 43000
## A_GBS_warm_log  6700
## A_dis_log      12000
## Q_GBS_cold     15000
## Q_GBS_warm      4700
```

```
## Q_dis          16000
## n_GBS_cold     84000
## n_GBS_warm     5300
## n_dis         17000
## p_cold        12000
## p_warm        2600
## deviance      110000
##
## For each parameter, n.eff is a crude measure of effective sample size,
## and Rhat is the potential scale reduction factor (at convergence, Rhat=1).
##
## DIC info (using the rule, pD = var(deviance)/2)
## pD = 22.7 and DIC = 4.8
## DIC is an estimate of expected predictive error (lower deviance is better).
```

```
summary(m0.mcmc)
```

```
##
## Iterations = 10001:3999981
## Thinning interval = 20
## Number of chains = 3
## Sample size per chain = 199500
##
## 1. Empirical mean and standard deviation for each variable,
##    plus standard error of the mean:
##
##              Mean      SD Naive SE Time-series SE
## A_dis_log      5.0195 1.00754 0.0013024      0.0169870
## A_GBS_cold_log -0.9457 0.73696 0.0009526      0.0065073
## A_GBS_warm_log 22.8202 2.00623 0.0025933      0.0323339
## deviance     -17.9010 6.74083 0.0087133      0.0256165
## n_dis         3.6255 0.11356 0.0001468      0.0005556
## n_GBS_cold     1.8925 0.14589 0.0001886      0.0009218
## n_GBS_warm     2.5194 0.25948 0.0003354      0.0023804
## p_cold         1.1973 0.09778 0.0001264      0.0005108
## p_warm         1.9203 0.36897 0.0004769      0.0041583
## Q_dis         61.8687 4.85552 0.0062763      0.0811832
## Q_GBS_cold     51.4921 3.30286 0.0042693      0.0294390
## Q_GBS_warm     182.2958 9.99706 0.0129223      0.1610838
##
## 2. Quantiles for each variable:
##
##              2.5%    25%    50%    75%    97.5%
## A_dis_log      2.935    4.372    5.0565    5.704    6.9053
## A_GBS_cold_log -2.441   -1.429   -0.9294   -0.443    0.4553
## A_GBS_warm_log 19.077   21.426   22.7502   24.154   26.9086
## deviance     -30.210  -22.568  -18.2289  -13.593  -3.7404
## n_dis         3.432    3.548    3.6156    3.691    3.8782
## n_GBS_cold     1.598    1.797    1.8954    1.992    2.1708
## n_GBS_warm     1.992    2.348    2.5261    2.699    3.0058
## p_cold         1.013    1.131    1.1948    1.261    1.3971
## p_warm         1.150    1.675    1.9421    2.186    2.5784
## Q_dis         52.038   58.686   61.9906   65.157   71.1335
## Q_GBS_cold     44.933   49.307   51.5150   53.713   57.9184
```

```
## Q_GBS_warm      162.613 175.523 182.3045 189.125 201.7409
```

```
gelman.diag(m0.mcmc)
```

```
## Potential scale reduction factors:
##
##           Point est. Upper C.I.
## A_dis_log           1      1.00
## A_GBS_cold_log       1      1.00
## A_GBS_warm_log       1      1.00
## deviance            1      1.00
## n_dis               1      1.00
## n_GBS_cold          1      1.00
## n_GBS_warm          1      1.00
## p_cold              1      1.00
## p_warm              1      1.01
## Q_dis               1      1.00
## Q_GBS_cold          1      1.00
## Q_GBS_warm          1      1.00
##
## Multivariate psrf
##
## 1
```

```
sink(file = NULL)
```

```
# Save raw outputs
```

```
all_samples <- as.matrix (m0.mcmc[,])
```

```
all_samples_path <- file.path(new_dir, "all_samples.RDS")
```

```
save (all_samples, file=all_samples_path)
```

```
m0_file_path <- file.path(new_dir, "m0.RDS")
```

```
m0mc_file_path <- file.path(new_dir, "m0mc.RDS")
```

```
save(m0,file=m0_file_path)
```

```
save(m0.mcmc,file=m0mc_file_path)
```
